# Supplementary material for: Enhancing sentiment analysis of online comments: a novel approach integrating topic modeling and deep learning
Source: PeerJ journal article supplement (doi:10.7717/peerj-cs.2542), 2024-12-05
Supplement: DatasetStaffHC.zip [file Chinese Product Reviews.xlsx]

## Sheet: Sheet1
Comment	Class
快就是手感满意也好喜欢也流畅很服务态度实用超快挺快用着速度礼品也不错非常好挺好感觉才来还行好看也快不错的送了非常不错超级赞好多东西很实用各方面挺好的很多漂亮\配件还不错也多特意慢满分好用非常漂亮外观卖家质量评价还可以老板钢化哦值得信赖很好是快递几天李小冉赵丽颖还会棒一段时间用的很赞值得像素美全收到了挺好用是好些漫妮宋慧乔有需要林妙可有点足开错也相当物流耐心很全挺多其他漂亮的非常喜欢总体没的说儿子都很合适好多赵奕欢秦岚运行高大运行速度原装追加热心很好用赠品范晓萱款式超多来说非常满意再来反应速度店家小礼品试用外形整体光顾了几习惯萧亚轩宋佳完美张惠妹刘若英林志玲蔡依林机子一大堆满意的应该是感谢用了我老公不太比张韶涵真品推荐给孙燕姿超好的顶峰服务唯一感觉不错张含韵确实很多东西晚了倍挺很喜欢的很好的愉快的电池很好看真货戚薇实惠都满意习惯性帮赞一个绝对吴千语谢谢发热应采儿非常杨颖朱丹唐嫣正品行货速度…	-1
差评，说好的返现返现都是骗人。东西很差 很垃圾	-1
售后真是差 买了不到15天锁屏键出现故障,申请换货过了审核说上门取件了 等了几天没人来 然后再查看进度就又进审核了 问客服怎么回事 说我说已经维修好了 不需要售后服务了. 我什么都没动就说我这样.然后我说现在怎么办.她说让我取消重新提交一次,取消了之后再也没有上门提取 和换货这服务了.她给我的解释是可能刚取消所以没有让我等. 我当初就是看那些评论说售后好买的. 别被人迷惑了.售后真是差.建议还是去实体店买把 那些给好评的我不知道是内部人员还是没用就评的 真是害人	-1
郁闷啊多等2天多无线充 充电宝和贴膜 和京东沟通没补发 心里那个郁闷啊不摆了 失败 失败 但东西还是 不错滴	-1
今天去贴膜时才看到在卡槽右面有一处很小的刻痕，很是郁闷	-1
，三星屏幕就是垃圾，碎的一塌糊涂，不要再买	-1
，冲着几千块钱去的，我看，什么锤子屏幕，10厘米不到竟然角被摔破了，差，差，差，重要的事情说三遍。防水，防尘，就是不防摔，怪不得推出碎屏保，就是清楚屏幕质量差。	-1
，放卡进去一直搞不出4g，第二天到3星专卖店让人鼓捣了20分钟才有，晕死了。另外充电时看视频处于发烧状态，微信点赞不灵光，来电接听你若在看微信，我考不知怎样接，有些方面还不如s3，唯一能赞的就是运行速度超快，看视频不卡。客服服务太一般，好像文字是做飞机去的，半天才有回应，售后也一样。唉，不说了。	-1
????????差差差差。。。。别的不多说，那做工真叫一个烂烂。。。	-1
(?_?)手机拿到手发现屏幕上面有小黑点(?&bull; . &bull;?)，虽然很小但&hellip;&hellip;	-1
*，老子昨天刚买就降价，还不能领取减100的券！恶心*	-1
**的*，618卖的都是问题机，真**的气人，*买买个二手机子，谁***爽？	-1
*元手机。其他优点没发现	-1
*实体店****,差评，没什么好说的	-1
*店大欺客，不讲信用，欺诈顾客！！！！！！！！！！！别的说多了都心累，你们看其他评论也能知道怎么回事多余的我也不说了，以后他们家的东西大家就看着办吧	-1
*拉机，客服骗人说内存卡没货了，以后都不会赠了，结果我拍的第二天就有了！！！	-1
*玛摔了一小下屏就碎了，去客服修吧，修完后有缝隙没粘住，第二天又翻修，倒腾了半天还是依旧，*还说我把框摔变形了，不到半米高，就变形了，好。三星牛比！发完评论，我就把手机摔了，你*用老人机我都不用破三星了！！！	-1
&zwj;卡死&zwj;了 &zwj;终究还是&zwj;信不过安卓，&zwj;真想说&zwj;给我的是次品	-1
~京东服务真垃圾，联系我购买了399服务，手机出了问题，双方互相踢皮球 谁也不给管，京东客服工号 52428 前面说的话，一会自己全部不承认，还说我以后也找不到他，还好，我手机都有录音，希望向有关能给给与消费者一个说法	-1
1，左下角缝隙处存在1CM左右的凹痕 2，摄像头右上角背板处存在十余个较为集中的类似于生锈般的小气泡。 申请换货，垃圾京东售后客服给我打电话说是做工问题，不给退货。去你MD，老子的金牌会员当喂狗了！ 强烈建议大家去线下门店买！再问候京东，问候那个客服，去尼码的！	-1
1，我是预售期付定金 2，我是13号上十点十分付的尾款，3，推迟发货时间，4，还没两天又多了赠品我都纳闷，你们是什么营销手段前期购买少赠品，后期购买多赠品。差评我必须给。还有以后不会在京东买东西了，你们欺骗的不是付定金这2000多人，而是这2000多人的心，我第一次差评，也是最后一次了。	-1
1,我要的雪晶白给我发成冰玉蓝 2,看了一眼后，联系客服说换货发回去，用你同样的包装，到最后拒签，跟我说内屏坏了，拒签三天你们不联系我，等物流打电话给我我特么才知道被拒签了。3，你们所谓的内屏坏了，怎么看都是机子本身的瑕疵，后来协调，从头到尾不说发错货，就一直咬着说内屏是人为造成不属于三包，不退不换。我特么用你们原来的包装发回去，手机包装盒上一点损坏的痕迹都没有，然后就一直说让我找快递开证明，我特么真的是呵呵！反正我是看出来了，你从一开始发的就是瑕疵品，我特么没看仔细签收之后，所有责任全特么推到我和物流身上，真是熟练。后来想想，我同学没帮我开盒，为什么封装纸是开了的。没那么多时间跟你们撕逼，认栽。发回去的东西还特么偷偷把保修卡和出货单给拿走了 真特么无语\n无良	-1
1，有问题找不到客服，让留言，留了言也不回。 2，14年买的s5，那时机器老重启，用了俩月气的不用了。现在出了S7，以为还进了，结果仍然一样，每天3-4次重启。 3，拨号键盘太*大，首选界面也不是通话记录，无法调节，不如三线品牌。 4，指纹识别很任性，有时不错，有时不灵敏，俩手（俩都录入了）轮着摸都不管用，等29秒。 5，手机待机一般，重度使用（我说的重度不是玩游戏看视频，就是长时间的用微信）待不了一天。 6，同花顺闪退，触宝拨号最新版闪退，其他软件暂时正常。 7，曲面屏误触比较严重。 优点，颜值高，反应快。 我说了这么多不知道能给我30块话费不	-1
1，跳出快速恢复弹窗微信一直失败，短信可以。2，上手第一,二天在三星应用商店中，打开App出现闪屏。3，能从三星应用商店下载的基础App太少，多数需要下载其他应用商店。4，手机里面预装App还是太多，多数不实用。	-1
1、手机屏比非曲面的易碎。 2、京东的手机碎屏售后非常繁锁。 3、本人对京东售后不满意。	-1
1.预定了绿色，八天了还不送货，被迫换了黑色，鄙视京东的违约行为。2，手机很漂亮，精致，黑色的也很有质感。3.手机软件依然喜欢，文字名片的扫描很好，系统流畅，感觉比过去的note4 流畅4.不足，发热，发热，这个热度，只有早年我用过的三星9100可以比，后来的note3 note4 都不会感觉手机热，即使是玩游戏也不会。这个6可不行，通话热，充电热，普通使用也会热	-1
10月6号下的单，手机是5月生产的，5个月没卖出去还是别人退货的？打开包装，手机屏和封套之间全是灰，东哥你倒是擦擦再发啊，直接就发了。 检查外观，正面上方有两处明显的划伤，在金属边框上，但不是很严重，此时已确定不可能是全新的手机。 其他没什么问题，考虑到换的话很可能更差，就不换了。 做为京东老用户，第一次做实了二手东果然让人无语。	-1
11号晚上收到的，昨天用一天，今天上午就坏了，触摸屏不管用了，关机也需要触摸选择才行，所以关机都不能用，崩溃！！	-1
11月卖的居然还是5月初的货，显示严重阴阳屏，申请换货，好几天都还在路上，担心过了7天我更麻烦，直接改成无理由退货。非常不愉快的交易。	-1
11点抢的没充电器，人家第二天不用抢的赠品全有	-1
12月买5月3的手机，拆开包装屏幕手机有灰，手机没电必须充电才开的了机，屏幕上黄下红。*果然不是瞎编的，电子产品再也不会在网上买了。	-1
12期免息变成一次付清，不开心	-1
15号下单，16号到手，之前产品不能使用东券，17号今天突然可以使用了，你们这是闹哪样？	-1
16号才买的，半个月就降价，申请价保，客服说超过7天，申请不了，当时买的时候页面显示送300优惠券，现在又说没有那个活动，真是气死了，强烈差评！！！！！	-1
16年6月12下单 6月13到的 晚上回去才打开 才用了两天 新机器电量费的太快 而且喇叭有问题 玩游戏 放歌本应该扩音喇叭响 但总是中间响 还发闷 而且内存占用特别高 膜是新贴的 不应该是7天无理由退换嘛 在京东买第一个机器就这样伤心 就想换个机器这么难吗	-1
17号23点下单的现货 23号才收到一分给物流 手机还是不错的 很惊艳	-1
17号买的，终于收到手机了，不过怎么不是三星原包装呢？怎么是京东塑封？难道是别人用过有问题返回来的产品吗？别人有这样包装的吗？	-1
17号买的一直没有送到，打客服说是有一个赠品没有货，所以没有发货，因为着急用手，客服建议分开送，先把手机送到，好不容易21号送到了，打开机手机屏幕里面有一个黑道&hellip;让我这失望，联系客服换新机器，好麻烦，真耽误事，发到厂家3天，检测7-15天，确定是机器的事安排换货。买个手机好麻烦，这钱花的好不痛快。手机什么时候能到&hellip;	-1
17号凌晨就下了单，下单的时候显示现货，下完单变成预定了，等了14天才到货！	-1
18号我下单买，今天才拿到，等了快半个月。然后说好的大礼包包装也没有	-1
18号直接抢到，然后十来天换了两次货，一次是屏幕有黑点，一次是连WIFI重启，耽误时间就算了 然后抢到的24期免息白条 直接没了 12期加500+ 24期加1000+ 尼1玛 我想说脏话...	-1
18号订单，22号送到，客服程序化的回答让人恼火，联系几次退货居然都不给退，作为一个钻石会员，我只能说：京东，我对你太失望了！	-1
19号为了不耽误晚上大巴特意下午打车上门自提，20号家里来人，21号上午开箱就发现灰尘很多，而且顶部有磕痕！客服以时间过长无法界定是否因我使用造成为由拒绝换机。老子连膜都没撕，我用你大爷啊？么办法，算你狠，打碎牙往肚里咽，郑重提醒诸位，以后一定要第一时间开箱检查，让配送员现场等着也要当面开箱，深度后悔开箱的时候没有录开箱视频！ PS：外观控值得拥有但是电池真不经用！！！4G网络下用今日头条看新闻，一个半小时掉了20%的电。真的是眼看电量蹭蹭蹭往下掉哦！	-1
１分评价只针对产品，对于京东的服务及售后本人非常满意，手机２次有问题都积极给予解决！对于今年的旗舰产品，三星的品控做的实在是差强人意，京东给我送的２个手机都存在液晶漏液现象，就是屏幕边缘有黄豆粒大小的黑点，实在是懒得折腾也就不换了，其它反面还是比较满意的．	-1
1刚买几天，今天设置一个功能，好像在指纹里面。就是头向左返回上一级，头向右返回下一级那个功能。第二次就没找到这个功能在哪儿了，求知道的说说，，然后手机两边曲屏直接花屏！中间一根花线一直上下来回动。手机瞬间发烫，关机都没用。气死我了。！！！！！！！看下图【图片】	-1
1星不是手机问题，是物流问题。帮客户买的手机。7号就应该到的。今天才到。早知道去某-*发顺丰了。	-1
1星给京东，反复重复过13号之后增票寄给我没有用，要求等变更好之后寄出。前后给在线客服，400电话无数次确认这件事。3号购物的商品，15号还是收到了我表示不需要寄出的发票。这种服务真是太赞了。	-1
2010年是全触屏时代我先择了三星s2因为屏大功能强大一直用了3年2013年我选择了苹果5s因为追求时尚都在玩苹果加上苹果漂亮2015年我想起了s2因为他是我追求全智能时尚的开始功能强大应用多感觉苹果5s没有那么因为应用少没有三星多所以我选择了s6+因为科技时代三星有着不断创新一直领先苹果加上曲面屏让我在次相信了三星当我拿到s6+时和苹果5s比让我失望难道三星一直没有变出了屏大和曲面屏其实并没有什么卵用屏幕发黄清晰度还没有5s好跟我2010年s2差不多一样难到你写着好像人家说的把牛?都吹到天上一样写那么高有用吗只能是欺骗再这样下去不求质量你就是下一个诺基亚	-1
20号收到的货25晚上用着就黑屏了，这算啥吗？	-1
20岁小青年在京东上消费好几万了，这次消费太让我伤心了；拿到手手机系统有bug申请了换机，就让我心里有点儿不爽了；用了一个星期这款手机就降价了。哎是么也不说了。刚才售后打电话说是咋么没有购买是么保障，信号不好没听清就断了，打过去就是机器说话了。 哎以后不想在京东买东西了 这次消费好伤心、好难受	-1
22号购买，23号到手，7月8号屏幕出现蓝点，经售后检测是屏幕有问题，按22号出库恰好过了15天，京东不给换，但我到手使用从23号开始正好15天啊，ci ao ni ma，路上物流花掉的时间凭什么我承担？？？售后给我修屏幕，正好这款屏幕全国无货，售后向总部申请给我换新机，三天后被拒绝，从别处给我找了块屏幕发过来。呵呵，这辈子不会再用三星，ci ao ni ma，要不是粉蝙蝠侠，锤子大爷买三星，老子不怕谁看到，不匿名，求你搞我，bitch	-1
23号到的三星s7 第二天贴膜发现home键和屏幕磨痕，而且贴膜距离我把手机自带膜揭下来只有4小时左右的时间，找了京东客服，说超过一天，是不是人为原因，不给退。就这样不了了之了。正常人会没事找事把手机划一下吗？还有手机充满电待机一夜跑了16％的电，就问问京东，你发给我的是新机子吗？你京东厉害，我第一次在你这上面买就遇到了这么些&hellip;&hellip; 这是第一次也是最后一次，这一次也就认了，虽然不能拿你这么牛逼哄哄京东怎么样，最起码能让我身边的人不在你京东上买东西，什么七天无理由啊！有理由都退不了。给你一颗星都多了，简直就是垃圾！本人不是水军，同时提醒一下准备买手机的 慎重慎重再慎重 ！	-1
23点抢购的送的东西表示不服，强烈推荐大家维权，越想越气，客服说给20东券，叫我去买我想要的本来送的无线充电器，我需要你那*块钱呀？搞笑。。。。。。。	-1
24期免息，还有680多的利息，客服解决不了！推来推去，我只能认倒霉	-1
27号零点下单，28号早上收到货。收货后因工作未拆封，晚上回家拆封发现手机不错。29号早上发现右下侧有一瑕疵。申请退换货，客服要求返厂检测手机，七天检测，来回十天左右。我嫌麻烦，问还有没有其他办法解决。答曰可以补偿代金券*在京东买个手机壳。 晚上发现代金券有效期截止到今天！！！真无语了。哪有*钱的手机壳！！！	-1
29好签收的，30号就直降*，泥马，可不可以再坑点，本来说如果可以价保，就将就用用，联系客服说使用过白条不能价保了，果断退货，说实话真不值*，曲面屏就是个噱头，看着很拉轰，然并没有什么卵用，发热就不说了，三星通病，也就最多值*，已经入手，能退就退，打算入手的，果断放弃，不要相信京东，不要相信三星。	-1
2k屏幕，太耗电，息息屏提醒很好用，但是没发票是什么意思啊？？？？？？	-1
2次销售 曲屏发绿 屏幕不受控制 乱跳 边角有切割破坏 面下面有图 也有放大图 最后一张是刚拆封单反拍的左下角有不正常的反光 由此证明拆封前就有上面的看不清楚了 我该说什么好呢 当初没有好好看看 过了15天了	-1
300多块钱，我不要了，我一直在京东买东西，很信任你们，但你们真让我失望，明明说12期免息，当时看着没问题，过几天突然冒出来个300多的手续费，最让我受不了的就是白条金融客服，我不想说了，我用了这么多年京东，今天算是领教了，那300多，我认了。	-1
30号买的31号就降800，真给力。	-1
30日晚上付钱买的6088的价格，31日下午降价为5288了， 要求京东价格保护，退800， 最后说我是分期的，不能价格保护，我说一次性付清分期，也不行 我说那帮我申请一点京券做补偿，最后都不行 态度不好，就让我退货。 如果退货我就买不到这个绿色的，我都收藏了很久 对京东的政策和客服都很不满意。	-1
31号订货的，最终4月11日才到。催了无数次	-1
32G太小，没有下几个软件就满了。这次对进洞彻底寒心了。看到以旧换新咬咬牙835把note3-9002给了他们。回头买松绿，不好用抵用券，打电话若干客服换来换去，上来先叫你讲一遍经过，非常理解我的感受，但是问题就是解决不了，我就是卖给地摊上也不会给我消费受限的人民币吧！既然消费不了，你们在松柏绿三星挂什么以旧换新？这个不让买，那个没有货，等我没有机器用，只好找一个可以用的，又内存这么小，，，京东，进洞！！想说爱你，找不出任何理由啊！！！白金卡，毛用！！！众筹股东商家，毛用！	-1
3月18号当天活动三星全场满1000-100 但是特么的我的就不给优惠。找客服SX客服还要我提供有优惠的订单。我脑残？有优惠的订单我还下普通的订单？	-1
3月22号购买，24号收到，4月20号出现这种问题，手机很爱惜的使用，放在电脑桌上突然出现这种情况，联系三星和京东，说过了7天退换货时间，只能免费换屏！这样的品牌和服务，我只能说我不在**买来这里买机器出现问题都是自己作的，我5688不去买苹果6s，买个次品三星也是自己作的～～～	-1
417号抢的中午就收到货了 非常惊喜 可惜！516号就黑屏坏了！还不到一个月 ！ 拿去三星官方旗舰售后点！维修的人一直诱导我说是我搞进水 接口发霉了！看我态度非常坚决才认定是质量问题。新机啊就被拆机了 说要换零件 但是现在没零件要等 。结果就是现在519号了还没给我修好 和苹果雨理由换新机比三星的售后真的是伤人。这就是我在京东购买三星的体验！咨询过两次京东客服。都没有给我指出我应该怎么做！	-1
4G卡放进去，始终显示3G信号，经常出现花屏或者部分黑屏	-1
4月21日花了*多购买的，还不到半年手机就出现问题了，真冤	-1
4月24号下单，25号收到货，物流给力没的说。今天5月18号，手机从电脑桌掉地上，右侧摔烂一个角，曲面从上到下一路碎到底，但触摸一切正常，不影响使用，屏保揭掉的话外屏碎渣全下来了，这质量没谁了，和小米3的屏幕质量有的一拼。京东说不在质保范围，只能去售后自费更换。三星售后说内外屏一体，需要整个更换，更换要价*。总的来说，这次网购真是糟糕透了，第一次用三星，真心让我失望透了。希望有意购买的朋友们三思而后行。	-1
4月24日下单，收货时快递员并没有开箱验机，也是因为我的京东的信任，也就直接拿回家了。因个人原因4月28日才开箱，结果一开箱就是右侧屏幕碎裂，于是马上打电话给京东PLUS客服，说是马上反馈，尽快为我处理，过了一会有人打电话来说不能处理，原因是怀疑是我自己摔的，即使不是自己摔的也不会来取件，只能自己掏钱去修，（搞笑吧，在你这买的有问题，让我自己买单！）于是继续给京东客服打投诉，到今早还是这个回复，真是店大欺客啊。本人京东钻石会员+第一批PLUS会员，花钱买了会员，却没享受到应有的待遇，本号一年在京东消费三到四万元，却出现这种情况，真心失望，对京东的售后真是不敢恭维，还好我是打的白条，已经把所有关联银行卡取消，也不准备还了，爱怎样就怎样吧，真心失望，奉劝大家别来京东买东西了！！！！！！！！ 附上手机碎图！！	-1
4月份买的，到现在才评价，就是想看看手机有没有其他问题，结果真就屏幕碎了，问售后客服本地没有维修地点，要到哪里维修，说了句请稍等，结果没反应了，问他怎么样？就给我说现在询问的人很多，结果15分钟以后还是没反应，有这样的客服真是京东的荣幸啊！下次绝对不来京东了	-1
4月份的机器，品控真心不好，卡槽按到底都不平，商品必须差评加退货。售后服务倒是真心不错，效率很高，手机给零分，仅有的一颗星是给京东售后的。	-1
5.15预订付的全款，等了20多天，终于拿到货，结果包装特别看着让人心醉，连个盒子都不舍得用，就一个塑料袋子，居然看到别人评论说现在有满4000减240的活动，我想知道京东到底在搞什么，最先预订的一分优惠没有，后面买的开始有活动，送的充电宝就是个大砖头，死沉死沉，根本不会用这样的东西，还有这客服，纯属应付，什么信息也问不出来，非常恼火，对京东非常非常非常不满意，果断卸载京东，以后永不来往	-1
5.16号预定，6.5号下午18点左右拿到真机 随机带的充电器 8.7日晚上充电，发出一阵异味，随后一摸 手烫出红片， 手机充电接口巨烫 真怕爆炸了 充电器也直接坏掉了！ 才两个月而已... （不知道各位同仁有这种情况没有） 客服傻B说 说我不在退换货日期内，只能返修了.. 然后上实体店问问有没有买这个快速充电器的 人家说只有普通的！ 觉得被坑了 ... 我没办法给予好评了 两个月而已....	-1
5000多块就这么个破手机，第一，电池不行，一天都用不到。第二，预装软件太多，还无法取的ＲＯＯＴ权限，还3个Ｇ的内存，通常在８０%，降不下来。第三，手机发烫，玩小游戏还卡得不行。除了曲屏好看点，我还真没发现这手机的优点在哪？上当受骗！~~~~~	-1
5288就这样的货色，右上角边框划痕，右下角严重凹陷，左下角边框黑点。京东越做越垃圾了，这样的东西也敢发出来，店大欺客	-1
5688，我爸让我给他买手机，给他挑了4g的ram的s7，找客服要序列号没有，还和我说别人能改！后来发现打电话中间容易断，十分差评，要是给其他人订，指不定还说我拿了回扣讷，卖东西卖掉了我的尊严～～强烈建议看到的好友买官网手机，虽然贵点，但质量保证啊，不会和一群套路的客服扯	-1
5688的东西，20天就出现了严重的质量问题，在售后检测为屏幕非人为花屏不开机，需要更换屏幕，我要求换机售后却说超过5天了。刚买回来20天的机器需要拆机换配件，买这个手机都知道这是三防手机，还是一体机，拆机直接造成这个手机三防功能损失一半。这些我都忍了，谁让有国家政策，放到售后说是五天之内修好，现在已经过了快十天了，竟然告诉我屏幕缺货，厂家还没发货。大爷的，我花这么多钱到底买了个什么，用 用不成，看 看不见，我即将出差，逼的我又买了个国产手机凑合着，我一直三星粉，今后不是了。这是最恶心的一次购物。	-1
5个单子 3个超时 现在还有单子没送到呢 电话客服预约不了 在线客服不鸟 京东你还能再烂点不？	-1
5月15日购买，足足等三个星期，不管由于什么原因，京东这种置之不理，毫无歉意，店大欺客的行为都是不能接受的。。 手机说实话，真的很不错，比我预期的还要棒，本来是当做送朋友5.20礼物的，后来不得不改为6.1礼物，最后又成了提前到来的端午节礼物。。。幸好朋友拿到时非常喜欢，不然要跟京东算账了。。	-1
5月16号下的单，足足等了三个礼拜才到货，还没法兑换三星的微信红包。包装简陋，非常粗糙，比首发大礼包差远了，还少了无线充电座！差评！	-1
6.18买完就便宜400，那些赠品可有可无....真心感觉一点都不保值...	-1
6.18那天搜集价格降到4000多 ，真无语	-1
618买的，以为便宜了四百，结果变成了4888又降了400！！！送的赠品以为我想要啊！宁愿不要赠品好么！	-1
618促销标价5688，促销过了4888，强烈谴责京东虚假标价，虚假促销	-1
618当天4998买的，没想到过了几天降成4888，妈的还降100搞什么飞机，真是买的不如卖的精...4998赠品有个硬壳和一个无线充电器，我就想问下一下，4888买的都是什么赠品？（手机用着暂时没啥问题，无线充电开了快充，充满的4个小时以上，其中规中矩）	-1
618活动买的 ，手机怎么样暂不评价， 差评的原因是618的时候价格是5688 ，然后给400优惠券，现在没优惠券是5288 ，既然优不优惠都一样还搞什么活动？直接多少就多少不得了？还搞个屁的活动？把消费者都当傻子忽悠吗？之前用的几个手机都是在京东买的觉得还挺靠谱，但这次被忽悠太让我失望了。	-1
618活动买的，4708。没几天就降价了，彻底无语，还618大促，这不骗人么。	-1
618活动周期搞活动，有一定幅度的优惠，这点还不错。不过包装相当的烂，赠品的包装有挤压变形的现象，手机包装非常的脏，就跟垃圾站里捡过来似的，不知道京东的仓储和物流是怎么搞得，这种德性的包装让人感觉怎么看怎么不像正经货，京东让人越来越没安全感。	-1
6PLuS坏了，11月4号买的三星手机，送到手以后发现听筒处金属有划痕，由于损伤太小懒得退货，但是今天发现屏幕出现彩色斑点，给三星售后打电话说漏液了，是人为损坏，但是我刚到手3天，自认为呵护有加，没有摔过，挤过，而且屏幕完好，手机周围完好！我实在不知道怎么人为损坏的！	-1
6千多买的没到3个月 发热烫手什么的我都忍了 几天更新完新系统出亮线了 前两张是拿别人手机照得明显的亮线 后一张自己的截图看不到 估计是屏幕完蛋了 从1代iPhone用到5s从来没坏过 因为总见别人三星质量不好 一直很鄙视三星 终于被曲面屏诱惑了买了三星 果然没逃脱三星的厄运	-1
6月13日手机买了10天就黑屏了，联系售后要求换货，售后一直协调，至今没有解决方案。再次提请售后换货，就没有声音了。没想到京东也会做这样骗人的勾当，不讲信誉，大家以后网上别买电子产品了。	-1
6月14号买的机器，一天后出现自动关机的问题，跑三星售后就是给刷系统，也不检测就说机器没问题。找京东售后更牛逼，检测7-15天，宣传的7天无理由退货呢？真是够了！	-1
6月3号四五点到手的，6/6上午就坏了！因为是急用，没有等6/18活动的时候买，价格也不便宜，所以用起来也特别小心，放在裤包里，出去半个小时，拿出来一看还以为是根头发，怎么拿也拿不掉，结果一看，已经裂屏了，正好这款松柏绿是没有保修的，现在申请售后，京东推给三星售后，三星售后说，没有什么维修贴，发票开的也不对，拿上这些单据再拿去售后点寄回三星公司还得签定结果看是人为，还是自裂，如果结果是人为，我就疯了，除了这条裂痕，其他什么印都没有，送的自拍杆一看都是劣质品，电线芯线都是外露的送也不能送这么差的，其他的赠品， 目前还不知道，那个充电宝都不敢用，万一爆炸了怎么办！	-1
6月5号到手的，才18天，刚好过了换货日期，屏幕就坏死了，这就是6000块的质量，真是恶心。即使修好也太不放心了。	-1
6月7日搞的预定活动是我见过的最恶心的活动了，最后没人买，开放购买反而比预定用户条件好，真T M扯淡，现在都不建议再买这蝙蝠侠版了，百分百是买家退货的货，有人已经收到蝙蝠侠是开封的了，现在都别买了，*名不虚传了！！！所有手机都是买家退的货重新包装再卖，这已成事实！！大家注意了！！！！	-1
7月15号买的5288元，7月31号降到4488，期间还能领一张4000返600的8月20号到期的专门买S6和S6E的优惠券，现在算下来只需要3888就能买S6。京东你坑人的能力今天算是认识了，这才十多天就坑了1400块。申请价格保护告诉我手机价格保护时间是7天，只有家电才是30天价格保护，我R你DA爷的，手机7天的价格保护我还不如申请7天无理由退货呢。这7天内的价格保护有个屁用！以前相信京东每年都在京东花个上万，现在京东玩 蛋去吧。越来越坑人了，以前的诚信也没了。	-1
8月14号购买，15号到货，今天是9月3号。出现的问题，一、到货时充电宝的电源显示灯就不亮，能充电，就是不知充电宝的电量情况。考虑到麻烦，又是手机附件就没理它。二，现在问题是用了不到20天，照相功能不好用了，显示照相故障。应该不是行货，质量很差。千万别再上当了，把我的遭遇告诉大家，就是不希望你们也被骗。	-1
home 键不对称，机身有缝隙，做工不好	-1
home按键，按下去就弹不上来了。什么品控啊。。	-1
HOME键掉了一点点漆基本看不出，本来想上图的但是单反也拍不出掉漆的那一点。差评！	-1
home键掉漆严重，基本残了，价钱不公道，我买后没几天从4888降到3888，搞什么。坑我么，差评	-1
mdzz 刚到货就能用优惠卷便宜100 不愧是* 怕麻烦懒得退了！	-1
S6 EDGE+ 9280 国行耗电太快了 ，我已经快忍受不了了，真后悔买这个了，以前苹果6的新机刚开始还可以用两天，后来用一天，现在这个9280使用频繁点连半天也撑不住，这有什么用啊 ，3000mA电池就这鸟样子吗？几个活跃的群都赶紧退掉了 国行9280，开飞行模式待机一晚耗电13％。这怎么用啊 。	-1
S6E除了缝隙大 品控烂 很费电 机器热 系统卡 易死机 电池小 活动坑 价格贵 贴膜不好配 重感应失灵 指纹解锁未响应 白条分期活动依然要手续费其他还是完美无缺的	-1
S7 edge 边框的缝隙可以插入两张A4纸，真的可以防水吗？请客服跟进！，多谢！	-1
S7e刚拿到机器就点升级，提示&ldquo;设备上的操作系统已遭未经授权的修改。。。&rdquo;，且恢复出厂设置后第一次进入恢复界面显示&ldquo;非官方系统&rdquo;。在网上查了，属于非全新机器。第二次恢复出厂设置后，上述两种情况都消失了。爱人让我退货，我当时也没计较什么，只要硬件没问题就行了。可是用了三天，心里面还是有点疙瘩，申请换货。原因也写得很详细，结果售后的来电话说这种情况要去三星售后开检测证明，还强调京东售出的绝对是没有二手的，听得出来说话语气比较轻蔑。我就呵呵了，*的名头是哪来的？？？之前买的surface也是有问题换货的，也没需要开什么检测证明。这次购物很失望，主要是在售后这块。	-1
s7e颜值不错，但是用了不到俩个月就黑屏起不来了。网上查了一下，这还不是个例。黑屏问题有不少起了，这一点大家慎用。找京东售后，态度和速度都没有问题，但是返回到三星售后去维修，到今天已经有一周了，还没信儿呢，这款花5000多买的高端机至此到达失望的顶峰。相比之下，还是手上的果6sp更皮实耐用。	-1
sim卡槽凸起的很厉害，已经退换了，要等15天，三星的品控就这么差吗，要买的人三思啊，说不定你就中奖了。	-1
tao宝上三星旗舰店买s6 edge送碎屏险 垃圾京东还需要买了才行 以后不会在这垃圾平台上购买东西了 要买手机的也注意了 京东上的手机不保修 和我在*上买的差很多 都是行货 不如自己去实体店购买 或者三星官网 千万别来这里买 百度上京东的贴子一大堆 都是客户购买后后悔的 什么垃圾服务 还不知道有多少人上当受骗了 前车之鉴 你买你吃亏	-1
一个只可以用15天的手机 手机从第16天各种问题各种问题，先是数据线不行了 然后按键又发卡 ，也不知道这个评论他们屏蔽 不屏蔽，反正这个手机太次了 问题重重，现在联系我只能拆机维修，想想都好笑 都看看啊下面有图片 这个之前都换了根数据线了，谁买谁SB	-1
一个如此高配置的手机玩一个小时的游戏机身就发烫，为什么？还经常卡住不动 ，我花6088就买一个垃圾吗？	-1
一个月，手机左上角的面的一小块就翘起来了！	-1
一催再催晚上才送到 什么事都耽误了 在家整整等了一天 送货的工作人员也真是让人无语 询问半天东西还不给我 直到我伸手要才给	-1
一塌糊涂破手机，过了退货期就出问题，只能维修还到处推责任	-1
一天两充，三棒子优化越做越烂，除了颜值和拍照以外，一无是处	-1
一天重启5 6次 无故重启，要求换货，京东墨迹的一笔，还要啥质量检测报告，搞笑么？	-1
一定要差评，看了好久为了赶父亲节给老爸买了这款手机，手机没问题，但6月17号买，18号价格还没变，到手里19号你就降价200，你咋不上天啊，要不是已经送老爹了真想退了，京东看来只有物流靠谱，价格什么的就是放屁！骗钱！	-1
一开始用的还不错，但现在用了半月这手机让我可头疼了，总是毫无征兆的卡壳，需要重启，手机没有任何信息自己在那响，现在充满电待机一会就没好多电，不值这个钱	-1
一摔就碎，一碎心碎，玻璃手机！随便换个屏幕都要1000多！	-1
一星差评是给京东的，明明白白的三星自营手机优惠卷就是用不了，过了618就能用了，骗人的京东优惠！！	-1
一星差评给京东！！！产品没有任何问题！！！！一星差评给京东！！！产品没有任何问题！！！！一星差评给京东！！！产品没有任何问题！！！！一星差评给京东！！！产品没有任何问题！！！！一星差评给京东！！！产品没有任何问题！！！！一星差评给京东！！！产品没有任何问	-1
一星我都不想给，发票硬是说给我了，让我仔细翻破盒子，就那破盒子都快被我弄烂了，可是发票在哪？我赖你们一张发票玩呢？我看你们咋给我解决，后续追评！另外手机纯属被外观征服，三星优化的可以用最差来形容，对不起这配置，玩游戏的朋友绕行吧！	-1
一星是给手机的，京东一星都不想给 ，才两天就降价，还不给退，以后再也不会在京东买东西了	-1
一星是给手机的，京东真是太恶心了，放在购物车里反复确认过的赠品(手环和三星原装无线充电器)，付完款就给我变成一堆乱七八糟的东西了，你们真会玩!呸!	-1
一星纯粹是给发货速度，整整晚发了一个月，中间不断忽悠我取消订单，忽悠我马上到货，结果现在一点补偿都没有，什么玩意儿？	-1
一星给物流 才买半个月就降价300 还有没有天理啊	-1
一星给的是三星。这才几天，都一直很注意！屏幕竟然好多划痕！！！就这样，半年后还用看？打字已经略显卡顿了！	-1
一星评价 预订的都懂 另外 我的货15号就收到了 订单完成时间是25号 这什么意思？	-1
一星都不想给，不到一个月就死机，黑屏，怀疑是不是正品	-1
一星都不想给，发票都不给，京东垃圾了，连钻石老客服都这样说。	-1
一星都不想给，快递倒是很快，结果拿到机开机屏幕亮的那一秒傻眼了，屏幕左下角好大一片黑的。一直京东方买东西手机也是，这次真的很失望。已经申请换货	-1
一星都不想给。手机屏幕是翘起来的，手机是弯的，还有点掉漆，已经送回去换货，前面看了评论也有这种情况，没想到自己也遇到了，不知道是运气差还是京东的品质有问题，去年在京东上买了两块表都出现了问题，换货一次维修一次，以后买东西应该不会再考虑上京东	-1
一次太失败的购物！什么叫双卡双待，当中移动和电信卡放一起的时候，移动4g功能就如图失效，差差差！	-1
一点也不好 手机脆 很容易刻出印记 发热 卡顿home磨损闪光灯磨损	-1
一点也不好，手感不杂好啊	-1
一点都不好，掉价太厉害，刚买几天就掉了几百，建议大家不要买，还不可以申请差价	-1
一点问题来回折腾，买过三星s7刚化膜窄了蛮多，京东客服推400，400又推给京东，一点解决问题的诚意。一点小事折磨客户，让人不胜其烦	-1
一用就发热三星的通病	-1
一直以为京东卖二手货是传言，让我碰上了，手机有划痕	-1
一直在京东买东西，这次真是让我从此不在京东买了，一个手机几天就优惠400。???大商家也不会缺我一个客户。???	-1
一直在京东购物，现在是钻石会员了，前段送了张券，是S6系列手机的，好像挺划算，就买了，绿色S6 edge，那么问题来了，收到打开货打开，有一层京东的塑封膜，再是三星的塑封膜，拆开来，手机的保护膜上面，里面都有很大的灰尘，心理就觉的不对，回想以前一直在京东上买手机，平板，都是这个情况，总觉得不对劲，因为去年在电信营业厅买的note4，是不会这样的，打开包装，是很干净的，*元的手机，这次就较真了，选择了退货，不敢说是假货，或是翻新机，但我可以肯定是京东重新包装过的，就在刚才，京东客服打来电话说，已处理完成退货，退kuan，但是之前用的优惠券已经过期，说是不能返还我，可我看了下，有效期是7－22到8－20，怎么个算过期，真怀疑京东是积压了一批重包装产品，要处理，才发的优惠券啊，你想用这券买好的是不会给你的，大家做个参考	-1
一言难尽，买的手机还是挺满意的。朋友一直说在外面买药便宜500-1000元，当时我看到京东可以分期免息和手续费，想着买两部，分期免息压力没那么大，因此买了，我第一次付款的时候没有成功。第二次重新付的时候看到页面上确实是显示分12期，免息，每期666.66，但是他系统的信息却不是这样的，因为当时已经是下班时间，就也没看他系统的信息，系统上显示的是30天免息，跟页面上显示的完全是两回事，京东的处理实在让客户无法接受。我确认当时页面显示是12期，每期约666.66，我拿了计算器算了下，确定是没有手续费，所以才一下买了两部，现在欲哭无泪。主要觉得亏了。外面买可以省好多	-1
一颗星也是给售后的，十一活动买的，第一个邮过来各种重启，后来申请换新，速度很快，不过两个手机都是5月份的老机器，第二个前屏右侧很大的一条缝，一张纸轻轻松松放进去，但是其他的没什么毛病，就不打算再换了	-1
一颗星给手机 客服实在太垃圾 问什么都不知道 真不知道京东客服有什么用	-1
一颗星都不想给，一个月不到听筒黑色掉漆掉成银色了，京东不解决，三星售后没权利！5千多的东西这个质量！希望大家不要被漂亮的外观给骗了！质量真的狠差！	-1
三天放口袋隔碎了。客服说修需要*	-1
三房买的这个手机送半年碎屏险！！！！在京东买的不带碎屏险！！！！需要单独购买！！！！！！！京东也没见便宜多少 ！所以直接去三星官方店买！！！！！！！	-1
三星s6edge预定机买不到，却有抢购机，但所有的赠品全没了。 京东营销手段~~~~duang`duang`duang`	-1
三星s7旗舰机还自营的竟然发热很厉害？无语了，玩一会就非常发热，电量一般般，顶不了发热这个现象！	-1
三星你T&amp;M&amp;D行不行啊。刚买了不到半个月降价*元。第一次用你丫的就这操行。还是用苹果吧，T&amp;M&amp;D没出息，你讲价也得有不长吧。靠。以后绝对不尝试你们任何东西，没品。	-1
三星最垃圾的手机，一下就没电了，，一周死机两次，反应越来越慢	-1
三星原封包装，摄像头进灰，侧面掉漆，Home键划痕，最不可接受的是Home键的位置是歪的！草尼妈的三星，**就买这个品质的手机，山寨的品控都比你好！赶快把惠州垃圾工厂关闭算了！不可原谅！	-1
三星商店根本用不了~垃圾	-1
三星太小气，孩子喜欢的环形无线充电功能才把计划买水果6调整为三星6的，结果看好的那个充电器竟然不是标配，还得自己花钱买，这和骗子没区别呀，我强烈鄙视三星这种五良商家，建议大家用脚投票吧！	-1
三星官网旗舰店买的，第一天用了三四天手机开始会卡屏，充电也很慢，建议要买请谨慎。	-1
三星应用垃圾。。。根本进不去。。	-1
三星想凭这手机咸鱼翻身？！发热，卡机，耗电，易误触，侧面按键卡死！还钱！	-1
三星手机不行、很差、速度慢、根本不值这个价位、请大家买的时候要三思、反应迟钝、信号一般、注意??真心奉劝	-1
三星手机好垃圾！！！运行内存严重缩水！！！4G的什么都没运行就只有1g！好骗人！手机发热厉害得要死！电一点都不经用！一天4充少不了！软件运行起来卡得要死！经常卡黑屏！！！！真的太垃圾了！！！以后再也不在京东里买三星了！！！是骗子的话就去死！！！！	-1
三星手机真烫，跟要爆炸了一样，打电话咨询说是正常现象，破手机浪费钱	-1
三星手机通病.80分钟快速冲好电.40分钟就玩个聊天就可以用完电,手机用超过10分钟就发热很历害.不懂还能换么?	-1
三星是我买过就恶心的产品，降价速度前所没有的快，买来刚过七天就降一百多，半个月又降，这机还没什么优势，这个价不如买苹果	-1
三星是给快递的，昨晚下的单今天十点多就到了；但是......快递员帮忙拆快递的时候，手机就这么掉在了地上，很恼火，过两天，不行的话果断退货。	-1
三星本来想分粉他，但是太难了	-1
三星标志下面有裂痕，已申请换货，哎	-1
三星永远都是垃圾 苹果还是好	-1
三星的4G内存简直不够安卓吃的，之前一直用ios，下载几个app内存占用就快满了，还有卡顿，希望官方赶紧出优化	-1
三星的品控真的不行，边框缝隙可以塞下A4纸。	-1
三星的手机就这样，买了很快掉价。首先电很不经用，要随时带充电器。其次曲面屏其实很容易误操作。最差的是前摄像头，稍微斜一点自拍，那镜头的畸变要吓死人。自己用过才知道。其实以前一直用苹果的，买三星是为了能通话录个音。以后应该不会再买三星的手机了，再买安卓系统的，也要买华为或中兴的。	-1
三星的系统兼容性太垃圾*块的手机，还没国产*块的好用。大部分手游都不能玩，等下就莫名其妙就切换到桌面。钱大掌柜都装不了。打电话去客服，售后也去了，讲是系统兼容性问题，不是机子硬件问题，不能退货。既然系统不行，就不要卖啊。太垃圾了。早知道这样，还不如买苹果6.还害我等那么久	-1
三星系统 用习惯了 不过时间长了就卡	-1
三星质量太差了，买两台S6 edge 两台都出现质量问题，第一台直接拍照时功能键相反了。第二台用了不到四个月直接开不了机了。三星真的太差了。不过京东的客户服务真的好！	-1
三星质量真心差，手机用时发烫的厉害，电池电量飞速下降，通话没声音。。。各种问题，去三星维修中心鉴定为硬件性能有问题，办退货时又发现京东电话客服人员连业务都不熟就上岗，本来留下手机上传三星开具的鉴定书就能办理退货，京东非要从我手里拿回手机，造成我与三星产生不必要的纠纷，给京东的电话客服差评！	-1
三星贵也就算了&hellip;&hellip;一直发热&hellip;&hellip;电也没以前s4耐电&hellip;&hellip;价格一直在进步&hellip;&hellip;技术一直在退步&hellip;&hellip;我就呵呵呵了&hellip;&hellip;送货京东更过分的，那么贵的手机扔那就跑&hellip;电话也没打，气的人直吐血。这要丢了谁负责啊！！！	-1
上个月买个手机不到一个月降价400元，这个手机不到10天又降了100元。不想骂脏话，搞的什么事。还能在京东买东西吗？问了客服也是白问，漠不关心。	-1
上个月十八号预定的，等了十几天，送来的手机上方的缝隙可以塞进指甲了！	-1
上午下的单，没有的赠品，下午就加上，玩我呀！！！给一星是看在手机的面子上，京东太差劲！	-1
上午刚买的手机，中午设置铃声就开始死机，换不了铃声！问售后说无解，让退货！???三星，我好不容易相信你一回，你却让我如此无语！或者根本就是京东的问题？大家别上当！	-1
上图片看看	-1
上网通话时间久了会发热	-1
下单之前有无线充，提交之后就没有了，问客服也是推三阻四，&ldquo;赠完为止&rdquo;，呵呵，是不是根本就没有？后来在看又有，呵呵啊。	-1
下单带无线冲，发货就给换了一堆破烂。	-1
下单时京东显示第二天到货，结果没有按时发货，客服说赠品无线充电器无货，其它都现货，外地调货，无期限等。致电客服，客服告知可以拆开发货，然后帮我安排了发货，赠品继续等，怎么早不这样安排，让我白等，我买的是手机，不是赠品，这次购物是我京东第一次没有五星评价。	-1
下单时提示6月8日到货，我在家里等到7点多都没有消息，后来联系京东客服，只是忽悠我，最后说提交给专员24小时给我答复，留下我手机，一直没有人给我打电话跟踪落实情况。第二天手机到货。是一次很难受的购物体验。	-1
下单明明选了24期分期，居然变成30天免息，白激活24期白条了，联系客服也无解，特别来气。。。。手机确实很好看，只是系统没苹果好用，曲面屏边会误触，电池容量加大也不是特耐用，没有评论说的发热量大，拍照也没感觉那么强大，夜摄效果确实牛逼。最接受不了是安卓微信实在没iOS微信好用，毕竟微信天天用。。。。	-1
下单的时候，无线充电器没货，拖了一天找客服才知道，然后让客服分开发，然后我又不小心取消订单了，无线充电的订单取消了，但手机却可以正常派送，最后联系客服说无线充电器的订单取消了就没了，也没的补发&hellip;&hellip;好郁闷。为什么是这样&hellip;&hellip;要是在莫猫猫购买随随便便随时都可以补发！莫猫猫还比这便宜300！！！大家还是不要上东狗狗了，此次购物1分，非常不愉快。	-1
不使用情况下充电！（因为根本不敢用）手机温度36-39度。我这是买了暖宝宝么？已申请换货！	-1
不像正品，质量极差，钻石会员PLUS也基本没有售后。东G的货一如既往的垃圾。	-1
不像正品，质量极差，钻石会员PLUS也基本没有售后。东G的货一如既往的垃圾。	-1
不出问题，大家都皆大欢喜，貌似服务很好！6月24号出现问题到今天7月6号，一直不能处理。甚至你都投诉无门&hellip;&hellip; 我只能说服务很差很差&hellip;&hellip; 金牌会员累积的信任从此没了&hellip;&hellip;	-1
不到一个月，用的莫名其妙花屏了	-1
不到一个月降800元，无语凝噎......	-1
不到七天屏幕摔坏，所谓的七天无理由退款都只是一语双关，极度差评	-1
不到十天掉了*！误触厉害手机放着不动乱触，建议大家不要上当	-1
不到半个月就掉*，找客服还管不了!!!!	-1
不多说自己看，刚到手的&ldquo;新&rdquo;机器	-1
不好	-1
不好	-1
不好	-1
不好，homo键偷工减料，很爱护的使用第二天就发现划痕，指纹感应不灵敏了，	-1
不好，买回来没多久卡槽坏了，手机卡卡里边了	-1
不好，垃圾	-1
不好，特别卡，屏幕还经常点不动。经常还没信号	-1
不好，看见到处都是用*券买的，我还是原价买的。而且这个机器屏幕上方左右品控不是很好，感觉没贴合好，这么贵的机器居然品控这样，瞬间对国行无爱了。快递周六也不给我送，就凭这个给差评。要不是水货价差小，我才不到京东买这货。	-1
不好，退了	-1
不好不好不好	-1
不好不好不好不好不好不好	-1
不好意思，我是10月4日买的，便携式充电器都不送，没过一周赠品就不同了，就有便携式充电器送了，感觉太坑人了！！！！！	-1
不好意思，手机很漂亮，一切都很好，为什么给差评呢，因为这个手机三星阉割了mhl功能，我极端使用不方便。以前的三星都支持mhl直接输出电视，这款竟然把这个最有用的功能阉割了，真的是越来越坑了。	-1
不好用 懒得解释 还是苹果好用	-1
不好用，打电话声音逐渐变小，真心不顺手，之前都用苹果	-1
不好用，老是有安全声明，已检测到未经授权的动作。重启卸载软件都不起作用。	-1
不好用！！！！！！！！！！	-1
不好用....................................................	-1
不好用啊 以前三星用3年 现在的三星用3个月	-1
不如苹果	-1
不就手，不好用	-1
不带一个礼拜就掉了。三星 Galaxy S6 edge（G9250）32G版 雪晶白 移动联通电信4G手机	-1
不建议买三星手机，不能也不让root， 我现在想骂人，你自身不带管理软件，还不让买家root，弄的手机天天跑流量，天天都是后台启动，天天发热，耗电量非常大，待机不打电话一天不到就没电了，什么破烂东西，问京东客服一问三不知，问三星客服他装死，装没看见一直不吱声。我很想大声的对你说我去年买了个表！！你继续装死吧！	-1
不建议大家购买，价格贵了不少，没有亮点，手机发热严重，系统呆滞反应慢，最主要有了问题三星售后不管，得找京东，京东的处理周期是一个月。收到手机时发现屏幕右下方有个坏点，当时想不影响使用就不折腾了，过了二十多天发现发现那个坏点有扩大的迹象就联系了三星客服，特别版让找京东，京东的客服就是一句话过了换机时间只能取回维修，不能换新。至于能不能认定是质量问题还的另说，但是维修得一个月周期。六千多的手机有瑕疵真不知道是怎么出厂的？京东这样处理我觉得太伤大客户的心了，现在的京东用店大欺客来形容一点也不过分。这款手机的屏幕坏点现象是很普遍的，百度搜一下就知道了。建议大家买这种电子产品要谨慎，最好到实体店看仔细在出手。现在投诉中。	-1
不建议购买，除了曲面没啥，用了一天屏幕就刮了，不说好的最新大猩猩呢，这么质量差最特么关键是没钢化膜贴，边框太软了，跟我2015一块儿放裤兜里直接干俩坑，再重复一遍，不要裸奔，屏幕质量太差，当然，这款机子颜值确实高，顺带，为什么我机子预装的软件在程序管理看到有，却找不到图标呢，真的是未开封原装？你们有预装搜狐新闻曲面版，新浪体育曲面版，新浪财经曲面版么？没有这就是二次封装！	-1
不建议购买。 说最重要的两点（说多了会被认为是黑）： 1：心率感应器有灰，很脏。镜片内侧有水痕和纸屑。轻轻敲击灰尘不动。 2：主页键声音过大。弹力过大。 另包装、配件很脏、曲屏误触等就不提了。	-1
不开心刚买2天就又降价了好几百，三星你就这么降价吧早晚没人买了	-1
不得不告诉消费者，由于本人很忙出差没时间去三星客服，导致现在手机用的很不方便，刚买的时候用两三天音量跟关机案按键不好使，找客服客服让我自己去三星维修，那时候刚买不到15天，然后我一直没去昨天又问客服尽然说可以申请京东守候，这不是坑人么神马意思而且现在京东售后越来越欺骗人了，第一次问为什么不说怕我退换么这就是现在的京东，今天让我特别生气昨天申请的售后今天来取手机由于我不再公司今天尽然说东西今天必须给他不给不行明天也不行我去吧这就是京东的垃圾产品跟垃圾售后这**是不是二手货，大家以后买东西要慎重京东已然不是以前的那个京东了	-1
不怎么好，音量键都已经按不动了，还有锁屏键	-1
不怎么样不怎么样不怎么样不怎么样不怎么样	-1
不愧是*	-1
不是什么好东西，买来第一天就没有信号，很麻烦要到处跑，换又要等几天，不如去商场里买	-1
不是双卡 双待 很不开心！	-1
不是很好！屏幕与边框连接处缝隙比较大！	-1
不是很好散热很差电用的也很快，唯一快的就是物流比较快，膜和壳也没送	-1
不是很满意，我是没有贴膜的，正常使用，屏幕也刮花了，背部也刮花了，建议大家贴膜吧！所谓不会刮伤，请大家不要相信，正常使用都这样，别提会跟钥匙放在一起了，对于不贴膜，不带保护套的用户，不建议购买	-1
不是想象那么好。还是实体店的好，sm9250和G9250有什么不一样	-1
不是正品	-1
不是第一次在京东买手机，不过居然没想到会收到次品货，不停的在提示静音状态，就算调了音量不到几秒又弹出来提示，恼火啊！！！！	-1
不是说有配件赠送吗？发过来怎么什么都没有？	-1
不是说防水的吗，今天下雨我淋雨了手机放在裤袋回来看屏幕都花了，屏幕还有点抖	-1
不是针对手机，说好的送内存卡我没收到，我手机都买了还会骗你个50块钱内存卡？送不起就别搞这些。你送不送无所谓，客服搞好像我骗内存卡的。还补偿我20块钱豆子，你补偿200块的豆子我也没骗你内存卡。问能不能退货，客服说可以退货但是赠品也退要退，我没拿到内存卡拿什么退给你？除非自己贴个内存卡的钱，我也是醉了，这样子不是无缘无故的花了50块钱吗？	-1
不满意，买了两次了，一直出问题，手机充电发热高温度	-1
不满意，我申请了退货，而且是七天无理由退货，十七号申请的到现在二十八号了还没有授理	-1
不满意，触屏反应狠狠慢，慢得让人想砸手机，很生气	-1
不满意，轻轻摔一下就摔碎了，真心不如店里，我在店里买的s4摔几十下了还没有摔碎，你这一下就不行了，电还行，	-1
不满意，非常不满意，手机在盒子里，过一天拿回手机壳准备安装，发现后方玻璃背板有裂痕，跟京东要求换货，京东回复因为超过24小时，不予支持，只能自己承担，不满意，非常不满意，非常失望的一次购物，差评，差评，差评，经常在京东购买，没有像这次真的窝火生气，不满意	-1
不满意，非常不满意！双十一的时候买的。活动宣传送价值200多的礼包，包括充电宝、手机壳，内存卡。结果15号收到货后只送了充电宝。立马跟客服联系，告诉我一到三天内会核实好，告诉我处理结果。后续问了两次，都是让我耐心等待。到了今天19号才告诉我前面一个客服根本就没有帮我处理.....还要再等三天才有结果。总之是非常不满意京东的这次购物。店大欺客，虚假广告......	-1
不满意不满意不满意，昨天刚买的今天就降价	-1
不看不知道，本来想来看看评论屏幕有没有漏光现象，因为我手机亮屏周围一圈会发光。没想到看到了现在的价格只要4888，当初618搞活动减400是5288。exm？这也太坑了吧。给一星已经是我仅有的理智了	-1
不知是否系统还没完善,刚开始用就经常卡机,超级烦	-1
不知道为什么经常死机呢 准备退了 再重新拍 不过挺喜欢	-1
不知道什么原因，偶尔会出现按亮屏幕后，触摸屏没有反应，必须关闭屏幕重新按亮才可以在触摸屏上操作，不知道有没有跟我一样的情况	-1
不知道是不是翻新机。用不到一个星期就坏了。这是第二次购买了，第一次购买现在没出现问题，这次肯定是发垃圾货给我的。你妹的。不想说了。坑货！打电话断断续续的声音，有时候干脆就听不到，垃圾货。老客户还这样坑！京东这次是第一次差评！	-1
不知道是别人拆开用过还是怎么的 耳机口有明显划痕 凑合用吧 换一台说不定也有问题	-1
不知道是我人品不好还是怎么刚过半个月就开始自动关机，也退不了货了，几千块买个手机用着都闹心。	-1
不知道是我倒霉还是怎么，刚买的机子就出现问题，，而且还是新出的，也许是硬件兼容问题，为了省掉麻烦环节，我还是直接去三星售后维修吧，挺郁闷	-1
不给力	-1
不给发票，无法保修上当了	-1
不给发票，预定官方给的*红包也得不到	-1
不能刷pos机	-1
不能勾选 心得不好吗 京东的服务和伎俩让我触目惊心，1 关于附属品购买。犹豫jd不到位的提示 未按指示优惠购买皮套。商品拍下后居然就不认账了。我说奇怪了 发票上不是你们的名字。 2 商品 这款手机存在瑕疵 不过不换了 用了3天，手机机身和卡槽都存在很大问题。 3 客服一塌糊涂 没有解决问题，已经不耐烦了 我也懒的再点击打开客户在线。 4 屏幕有坏点2个 细微，难道京东这批货特殊的？？ 这是 次非常糟糕的购物！	-1
不能发购买的情况吗？	-1
不行 手机问题很多，不会自动待机屏幕一直是亮着的，而且会卡机充电充不满	-1
不行，信号不好有问题	-1
不行啊，有时会出现没有触摸，屏幕都会不断闪，出现无法控制的状况，想尽办法才能关机。关机后重启就没有问题，果断时间又会出现。	-1
不要脸的京东，有赠品的非说没有，这个订单被前面的订单覆盖了，?两个订单的手机型号不同内存不同，非要说是一样的，不是在乎你们的赠品，这么大的公司，睁眼说瞎话，没诚信可言！	-1
不解释	-1
不解释。	-1
不该不给环形充电器，人家都有，为何就我没有？	-1
不送充电宝?	-1
不选择苹果6s的原因是看到满大街不是装逼就还是炫耀的二货！看不惯装腔作势的样子，所以选择了三星。说说该手机的最大使用感受，首先是特别有质感，不会给人摇摇欲坠的感觉。鄙视三星继续使用发烫的高通cpu，ram继续在原来的手机上进行阉割，说好的4GB怎么只有3.3？你是拿消费者当猴儿吧！	-1
不针对手机和物流，买的时候送12期免息，交易完成没免息了	-1
不错漂亮，但是没有发票和意外保	-1
与预期差区太大，失望中	-1
东东假货不是盖的，以低价诱人上当，机子已退	-1
东哥玩不起就别玩，说好给2万京豆那，付完款就不承认那，你雇的都什么客服专员啊，参加满减就不返了，没有质量问题不能退货，吓唬谁呢这，我有截图，你们字面上没有一处表明参加满减不能返京豆，付款的时候可以两个活动任选其一啊，为什么我还能正常付款呢，奶茶又缺奶粉钱啦，从我们老百姓身上骗是吧，最近参加这活动买这手机的人挺多，我**非得把这事弄微博上去，联名点人臭臭你们丫挺的，骗到我头上你们丫算是骗错人了！	-1
东西一般手机，边上有很大的缝隙正准备退货了。	-1
东西不是正品京东就是个大骗子大家最好不要到京东上购买手机居然连卡针都没有找售后爱理不理要么就打个电话过来立马就挂断老子就当花几千块钱买了个教训这么多年网购以来第一次给超级差评	-1
东西值得购买，不错&hellip;&hellip;，京东有点不靠谱	-1
东西发热严重品控差劲很多问题已经退货	-1
东西只能说还行，感觉京东有欺骗的嫌疑，下单以前说是北京有货，下单后就说北京没货。	-1
东西好坏先不说，快递了一个星期才到！！！这速度我也就不说什么了！！！绝对差评！！！承诺第二天到货，还跟客服联系了好几次，完全没人理！！！！	-1
东西就不说了，我洛阳的东西居然给我送到开封了，京东太不靠谱了。	-1
东西很垃圾，才买一个月手机就自动关机无法开机。所以方法都用完了都不能开机，售后差的没法说！要看证据可以私聊我	-1
东西很好，送货很快。	-1
东西很帅 不过工艺太差 边框黑边宽度右边是左边的两倍 下面耳机接口和充电接口边缘很毛躁 金属边框两边的切削宽度也是明显不同。屏幕边缘 摄像头边缘 各种缝隙。对这种旗舰手机的这种问题 京东还不给换 理由是可以打电话 可以用就不给换 嗯 确实可以打电话可以用	-1
东西很快收到，售后服务太费劲，也太死板了。选择发票明细的时候系统自动识别为电子版，然后选择补开纸质的客服告诉我需要3-5个工作日才能开出来，服务也太费劲了。	-1
东西挺好就是发货慢！	-1
东西挺好的黑色炫酷，就是刚买你就发券我还抢到了，便宜了300很不爽，为啥快递要隔天到	-1
东西是不错的，唯一非常不满的就是32G的没货，退货了换成64G的了。。京东不作不会shi！这个必须差评。这么大的电商，让人失望。	-1
东西是好东西，快递员服务态度太不好了，东西不送到地方，打电话不接还不回，电话里大声喊叫，我没看到东西他提前签收了，因为一个快递员对京东快递伤透心，再不会用京东快递了。Tmd	-1
东西是我喜欢的，没话说。。 但是因为京东的服务，无法好评！这么多年以来，第一次给最低分！全额付款预订，美其名曰：5月21日全额付款的优先发货，但是足足等了半个月才收到，头两天发现楼下的小店都已经有现货了。。没有接到京东的任何提示、道歉、补偿！中途找过三次客服，全部答非所问，一群戏子！ 京东这样的服务，离埋葬自己的日子不远了！	-1
东西是真品。。\n就是颜色色差严重。。和图片真的不一样。。\n本想退货，可是店家不同意。拿出来很多文件，意思就是说国家规定了上了电池就不能退。\n我其实想说了。这个电池也不是我想上的，就是在上边的。。\n建议：在宝贝描述里写清楚，开机了就不能退换。。这样大家买的时候都会考虑。。起码连告知都没有。就说开机不能退。。\n你们不说我们怎么知道，我还以为你们官方店铺和京东一样呢。7天无理由退换呢。。\n结果不是这样。。\n卖家也承认了。色差存在。。就是不给退。还给我说乱七八糟的，后来竟然不说话了。。这个客服也真可以了。\n后来一个客服还是耐心解释了，虽然也是不能退，但是心里心里没有那么难受了。。\n浙江电信还是值得信赖的，可千万别做出来让我们不信任的事情来。。。	-1
东西是翻新机，买过来还有磕碰，内存占用高，发烫厉害，不给换不给退。给维修还要等30天，买手机买了个心病	-1
东西有问题，品控太差	-1
东西还可以 说了有发票的 结果没有 联系客服客服说有电子发票寄给我了 结果我翻了半天也没有 再联系客服 要发票 东西到手到现在快两个半月了 也没有给我寄 气得不行 直接给差评	-1
东西还是很满意，不过服务不说了，以后尽量去*买了，以后国米买人就有我的一份。	-1
东西除了速度慢了外还是很帅的，就是我拿到手不到2天，优惠马上就变了，增加赠送的东西，这不是坑那些先定东西的人么。蝙蝠侠版本来就不参加5000减400的活动，为什么又突然增加赠送？还不能补送。完全就是打击在京东买东西的积极性，定了半个月才送来，一送来就增加赠送，不知道是什么意思。以后在京东上买东西真的要好好思考下了。	-1
两个星期碎屏，懒得说了。另外装两张sim卡就不能装内存卡了，好晕的设计，越做越落后了。	-1
两台手机，浅色那台在京东买的，深色那台**广场买的。请告诉我哪台是真的？买回来玩王者荣耀就觉得帧数不对。**买的那台高画质稳定30帧，京东这台低画质27.28帧。请告诉我谁是翻新机？京东就是这样？	-1
两张卡只有一张能通话，要命的是，一张卡在通话，有别的电话打另一张卡，竟然是静音，既不忙音也不提示占线，就是那种类似于故障的状态。 电池真烂，充满电没什么用顶不了一天。 从三星铁杆粉丝到失望，三星没落了，s6是个转折点！	-1
两点非常不满意，一耗电相当快，充满电玩微信网页3小时电量剩10%，二近五千的手机也不贴个模！ ??	-1
严重欺诈，说好的赠品直接换掉，没有发票， 属于诈骗了11点下得单，以后基本不会再京东购买手机了，太伤心了，而且新机偶尔还会卡，完全比不了苹果	-1
个人原因，手机卡都还没有装上，平时玩的时间也不多，由于卡没装上，就放家用来听听歌，看看新闻。今天突然在听歌的时候出现花屏，没摔没砸。到今天一个半月没到。又超过了换货的时间，只能申请维修。第一次用三星的机子，这种机率都被我碰到了。已申请售后了。后续怎样再来评	-1
个人觉得此款手机就是个花瓶，电池玩游戏最多半天没电，而且发烫，充电过久会导致黑屏无法开机需要按开机加功能建加音量减才能开，反正最后一次买三星产品	-1
个人认为不是国行，因为附近没有检测点所以还没去检测！礼品东西没有其他店铺好，送的无线充电器经常不能用	-1
中秋节收到，结果是个残次品，1CM的坏点你们是瞎子看不到么？这样的东西也敢给顾客？	-1
为了得京豆，三星s7掉漆严重，谨慎购买	-1
为了豆豆，我就评论一下吧。	-1
为什么，刚买第二天就降价***，这是坑人嘛！包装简直烂的要死，一星是给物流速度的	-1
为什么SIM卡槽外凸？退货。	-1
为什么一个月前不送无线充电器？？？	-1
为什么一出贴了两个标签 而且里面那个标签是之前就被割开过 被人动过手脚吗还是假货	-1
为什么不开发票，万一手机有问题我找谁，京东越来越不负责了。	-1
为什么差评 因我是预定客户	-1
为什么感觉看微信朋友圈照片不清晰有没有同感的人不知道什么原因	-1
为什么我刚买的手机里面会绑定着两个银行卡？请，你们给我个解释，	-1
为什么我收到的新手机里面。在设置呼叫转移里面。已经有了别人设置好的号码。13701110216	-1
为什么我的联通卡装手机里只能打电话，不能接电话？？？	-1
为什么收件的时候不让开箱？不然就不会有这么多事 收到的手机后盖玻璃居然是碎的	-1
为什么每次在京东买的三星都会有质量问题呢？我也是醉了，第一天就发现屏幕右下角不能正常显示！	-1
为什么没有发票，碎屏险也没有！？	-1
为什么没有发票？？？？？？？？？？？？？？？？？让人买着不放心	-1
为什么没有发票？说的有呢？我在怀疑是&hellip;&hellip;大家注意	-1
为什么没有进网许可证，	-1
为什么没有配送环形充电器？三星官网上是有配的，我要投诉，打劫了我的赠送品！	-1
为什么用起来很卡，无线上网都会慢，还有别人苹果手机发的短信息我收不到，问题太多，好失望	-1
为什么给1星,日了jd,组合白条竟然不能免息,那我买的时候特么为什么还有免息选项,大爷的,玩我呢	-1
为什么耳机打电话，对方听不见声音？	-1
为什么要评论，不评论，就是好点，讨厌这种方式和这个产品！	-1
为什么要评论，不评论，就是好点，讨厌这种方式和这个产品！	-1
为什么非要十个字(⊙o⊙)	-1
为何别人收到的是六七月的机器 我收到的是四月份的 而且那包装真是无力吐槽 所有东西就装在一个塑料袋子里	-1
为何安兔兔性能测试才8或9万多分，为何远达不大13万，是不是三星手机参数星作假欺诈，还是我的手机有问题？	-1
为啥12月底买的手机，生产日期竟然是4月份？？	-1
为啥我买完了就送无线充电了。怎么可以这样！	-1
为啥给1星呢，我是4月18号下单19号到的，着急有事儿就没当面拆封验机，等到回家后，金属框有划痕，狗东，凑	-1
为毛没有入网许可证？	-1
之前S6+的使用还是很满意，没有以前朋友给我说三星会卡会自动下载软件的情况。这次的S7我就曰了您妈妈了，才买几天？天天早上起来就看见屏幕上显示什么什么垃圾已经安装完成，您妈那个B的垃圾三星真是狗改不了吃屎是不是，我就说这次S7怎么比S6便宜*块，都您妈节约到下载垃圾软件上了，滚您妈的，真J8后悔！老子一颗心都不想给你们，垃圾三星	-1
之前买的S6都没出现 侧面按键软绵绵的没弹性 才不到半个月就成这样了	-1
之前用过s5就觉得不好，电池不耐用，发烫，于是换了苹果，这次禁不住是6的外表又买了，结果真的很失望，被外表迷惑了，还是苹果好用	-1
之前的订单，只送了无线快充，从17号开始突然加送相机和OTG优盘，京东你让之前预定的老客户们十分伤心，一心差评妥妥的！	-1
之前看到央视的每周质量报道京东商城涉嫌售卖二手苹果手机的事情，里面提到京东在网页上自称获得苹果官方授权销售的说明，但实际苹果公司官方声明从未授权京东商城销售，这点让我对于京东作为这么大一家的上市公司的信誉打了很大的折扣。 这次买的手机虽然是正品，但是外观却有多处磕碰，只能说京东的工作人员的责任心越来越差了，希望相关领导能注重细节，特别是贵公司客服的服务培训，实在是越来越差了。	-1
之所以给1星，完全看手机的面子，非常不满意的一次购物，明明买的是S7edge送的赠送却是按照S7的送，问客服还说换不了，退货还得自己出运费，还说什么送完即止，完全是骗子	-1
之所以给差评，是因为它误导消费者，什么双4G，骗人的，只要你插了电信卡，另外一张无论是移动还是联通都只支持2G，参数和海报上也不说特别清楚，纯纯粹粹的欺骗，说什么移动联通电信都支持4、3、2G的网络。因为电信套餐没有联通的好，可绑定的太多没办法消掉电信卡，所以就办了联通卡，现在毛线用都没有，还花了这么多钱买了个破手机，早知道还不如去营业厅充话费送一个手机算求！	-1
乐呵给男朋友买个生日礼物 发现内屏里有个坑 于是吧 联系京东 京东让我们找三星 联系三星 让我们找京东 最后两边给的答案是 哎 这又不耽误您用 您倒霉啊 这个不在三包范围里啊 您活该啊亲 呵呵哒 跑了一整天 售后店跑了一大圈 打了n个电话翻了n遍地图 要我说吧 卖不明白就别卖了行吗 要我都不好意思可哪儿打广告 你说对吧 呵呵	-1
也就是因为蝙蝠侠才买了这个。但是才用一个月就坏了，而且是备用机，基本不怎么用。一点亮屏幕，听筒下面那块温度有70℃以上，打个电话都烫耳朵。手机现在已经返修了，不知道啥样！	-1
买一个多月了，出了各种问题。哎。我很失望对这款手机。屏幕在包里放着压到包。手机屏幕碎了。去客服告诉我换屏幕要1260。太贵啦	-1
买个手机从20号开始买 到手第一台屏幕坏的，为了能尽快退货自己去三星售后开的检修报告，然后退钱退了5天，结果少退给我400多找了2天，重新下单显示是现货，下单以后发现不对被骗了。显示库房没货又等了N天，催了客服N遍。这次京东买东西真的买的很恶心，费时费力。早知道这样让朋友从外面带一个回来早就用上了，希望京东以后对售后这部分要加强改善，另外机器发货之前的检验希望能仔细点。	-1
买个这么贵的手机,连个膜都没有,追问售后也是一拖在拖.其中还包括让我自己去联系供应商;我滴个天哪~~~东西反正你也买了,好与不好你都得接受.这对我再京东坚持购物的信念给了重重的一击;伤心难过也失望.提醒各们朋友.买之前请先找好膜~~~.太让人失望了~~~京东~~~	-1
买之前客服说没拆封过，结果拿到手发现已拆封，表示很不爽，怀疑机子被人动过手脚，请大家慎重购买	-1
买了10天降了300，真坑	-1
买了20多天摄像头出问题照片有个黑影，垃圾京东售后垃圾三星。其它的不想说。	-1
买了一个多月 充电器就接触不良 三星质量太差 不建议购买	-1
买了一个星期，竟然就降价*了，这价格，永别了，三星！	-1
买了一个星期降价。还没有补偿，果然很垃圾的电商	-1
买了一个月，传感器都坏了	-1
买了一天 快充头就坏了 京东给换了 但是不爽	-1
买了一天降价600。还没送无线冲。我呵呵了，手机很好，但我很不爽。权衡之下也懒得退了。习惯性5星现在被打破了，给1星吧。	-1
买了一星期降*元太坑人了！	-1
买了一礼拜就修了，真不怎么样	-1
买了七天 正好第八天的时候屏幕破碎了 返修还得自己掏钱 质量有待考证	-1
买了三天后就加送无线充电，我三天就亏了好几百（不知那无线充电是否值那标价），打电话问客服，说促销不是降价，所以不保值，我服了。所以我建议京东：以后凡是降价的东东，你们标价还是不要变，在赠品那加一个全品券。那以前的买家不会再说什么保价了，因为你们一句促销不是降价让所有的买家无语。就算买家打官司，投诉等也无门。京东够绝，美名其曰，俺家的东东都保值	-1
买了不一个月。前段时间一下子又降价400.好纠结啊	-1
买了不到10分钟就出现了严重漏液现象，申请退货，各种叼难，说插卡处有划痕，不给取件，质量问题那么严重，还在别的地方挑刺，那种划痕根本就是叼难，jd越来越霸道，越来越叼难人	-1
买了不到20天，送话器就坏了，特殊情况京东平台操作死板，不建议在京东买，还是到实体店吧，对京东太失望了，差差差差差差差差差差差差差差差差差差差差差差差差差差差差差差差差差差差差差差差差差差差差差差差差差差差差差差差差差差差差差差差差差差差差差差差差差差差差差差差差差差差差差差差差差差差差差差差差差差差差差差差差。。。。。	-1
买了不到一个月前面板与边框出现缝隙，前面板松动，缝隙可塞进一张A4纸厚度，京东售后服务态度也不怎么样，说是正常现象，令人难以接受。	-1
买了不到一个月就坏了。充不了电。。。	-1
买了不到一周就降价（*元），超不爽，申请补差价！！！	-1
买了不到一周降价400，还京东618？？？我就呵呵了	-1
买了不到一礼拜，充电器头坏了，手机扬声器滋啦声，我送去保修，保修单弄丢了，然后就给我打电话各种推卸责任，到最后赖快递身上了，我就想问问如果没有保修单你们怎么给我换的充电器，还跟我说没收到保修单，这么不负责任的话也能说出口。	-1
买了不到两个月，主板就坏了，到三星服务中心维修，维修工程师既然说（机身串号在三星系统查询不到，三联标与机身标号不一致，保修不了。）。一直信赖的京东既然有这种问题，失望啊......	-1
买了不到二十天，就死机了，进不了系统了，质量有点怀疑哦！	-1
买了两个星期，小孩玩一个核桃，大概40厘米高度自由落体，把屏幕砸成这样，屏幕硬度绝对有问题。	-1
买了两台、开箱后发现其中一台镜头明显是歪的，三星品控有问题！换货因要检测，不知什么时间到手，五一前没希望用了。郁闷的购物！	-1
买了两台白色这台屏幕泛蓝 打侧看严重变色 金色的那台没事 已经申请退货	-1
买了之后一周发展home键两端按下去虽然听到了反馈声音，但是没有反应，售后说这不是问题，我就联络了京东，京东很干净利落，给换了新机。给京东好评，三星售后差评。放几张夜景图	-1
买了之后把我的白条止付了！打电话到客服说我的账号存在系统风险，叫我把密码改下，改了之后也没声音，白条依然处于冻结状态，玩不起就不要玩！本人从来无任何不良信用记录！	-1
买了五天出现质量问题	-1
买了俩星期就降四百！受不了了	-1
买了几天就降价，*买的，真心垃圾！	-1
买了刚好第七天屏幕就花了，正常退换中，真心差劲	-1
买了十几天出现相机故障，返修到现在为止还没有消息，实在没有心情给好评	-1
买了后，当天下午出现问题，屏幕白线，换货把送的手机壳弄丢了，不过后来给补发了一个。 最关键的来了，换的货明显京东自己翻新的旧机器，像是别人退过的，京东号称送过来的是原封未拆封，但是换货回来的机器的封条居然是京东自己封的，而不是三星原厂的。再换就不给换了，给公司买的机器不计较了，但是告诉广大网友，京东买的东西如果出了问题，选择退货重新下单购买，如果选择换货100%会遇到翻新机，我买了好多次了，真的是这样	-1
买了四天就2次显示无SIM卡状态，售后告诉你没有质量问题，简直就是垃圾。最恶心的一次购物，垃圾垃圾垃圾垃圾垃圾。奉劝大家不要在京东购物，产品太差。	-1
买了就降价 还不给退差价 差评 恶心	-1
买了当天，快充就中奖，重力失灵，嫌换机器麻烦，凑合用了1个多月，今天快充完，直接黑屏，各种没反应，我反正是对这手机伤心了，想换新机器还没法换，只能维修。求说法。	-1
买了很多京东的东西都很好。直到今天第一次送出一星。第一第二张是我的图片看屏幕右下角，到货后一小时发现的。第三第四张是京东评论里的图片。我只能说中奖。大家以后拿到手要看仔细，开箱验货。 京东这点很好，让我无理由退了。	-1
买了快一个月己经五六次屏幕乱闪失灵！	-1
买了手机就半个月，没有发票不说，手机一直自动关机自动重启，去三星维修点，刷了机还是如此，这明显坑顾客！！！怀疑这是不是正版机！！	-1
买了才15天就降价，而且在办公室空调间里还能热到烫手，好奇是不是能够煎鸡蛋了。。手机曲屏还有反光，影响屏幕显示，差评！	-1
买了才一个月就降了一千，强烈要求补差价。太烦人了，以前从来没出现过这种情况。	-1
买了才一个礼拜,申请价格保护,却说是用了东卷,可是现在一样可以使用东卷价格也确实跌了!霸王条款!欺骗消费者!刘QD 的 全家去死!	-1
买了才多久，就这么掉价？	-1
买了没两天就坏了，中间检测到现在都没有个结果。真的没什么话可形容了	-1
买了没两天就降价500，申请保价说是送了个赠品不让保。 刘老板，少一些套路才能走得更远。	-1
买了没多久就大降价，说好的返券也没收到，机子本身很好看，5寸屏也比较适合小手，刚好一手可以掌握，侧屏没什么用，发热还是比较厉害的，电量就上下班用用的话还是可以撑一天半，一直开着看网页的话大概3-4小时就得充电。信号还好。	-1
买了第三天，这特么送的壳就裂开来了，都不知道配件是不是原装的，就是京东的速度快这个好	-1
买了第三天就屏幕下方触摸失灵，京东卖次品的申请换货就要15个工作日客服一个一个推	-1
买了第二台了，用起来卡顿，无语，已退货	-1
买了第二天就送无线充电器，什么意思，	-1
买了还不到一个月就降价800，无语了，以后再也不买三星了	-1
买了这个手机半个月信号格除了打电话来电话信号格是满了剩下的全是一两格什么玩意啊4888，白花了。	-1
买到不到一个礼拜就降价800	-1
买到手之后因为种种原因没有第一时间拆开细看&hellip;后来细看之后手机表面有被硬物硌压的痕迹&hellip;想说找客服换一个客服不给换&hellip;对京东失望了	-1
买到手以后才发现太贵了	-1
买到手第二天就降800元，无语。	-1
买到手非常的失望，手机并没有和这个价钱成正比，还没有国产的手机好用呢，骁龙820的手机？安装个app都需要很长时间，等待安装中，非常的慢，	-1
买后就降价，home键太容易花，用了两周都花完了，	-1
买后第二天降价*，京东承诺的保价就是骗人的！不能退货不能退差价！找客服理论，客服说这就是这个游戏，你玩不起？？818当天，*厂邓超打广告的店才卖*，而且也是限时达。SN入住*后京东优势没有了。以后不会在京东买东西了。（发表评论说有竞争对手的名字屏蔽不让发！！！！）	-1
买啦不到就降价啦 还直降*~~哎	-1
买回15天内，发生四次自动挂断现象，听闻京东7天包退15天包换大名很久，于是，我申请换货，客服答应给我换新的，问派送人员会不会给我拆了修修了拆的，拍胸脯说不会，肯定给我换新的。结果，我要求的是换货，他们给我原物返还了，人家检测中心自作主张给我升级，说我的手机问题升级就能解决，说什么都不给换。有问题不尊总客户第一要求，自作主张给我升级了，手欠。我看到我的处理方式是原物返回后找客服说明情况要求换货，客服答应给我处理，第二天来个电话京东的，让我先接货，然后再反映问题，我说我不同意，货我不接，然后他挂断了，当天下午，我下班路过门卫，说有我快递，我一看，特么的手机给我拿过来了，我没接到电话，我也没签字，京东好霸气哈？强制客户接货？都不电话通知我取货，随便一个人就能接货？有没有点责任心？店大欺客啊？要我说你们没那本事就别吹那牛B，7天包退15天包换要我看不如换成7天没毛病包退15天修不好包换行不行，…	-1
买回一个星期就降价!水深啊&hellip;&hellip;	-1
买回来5天就白屏了，变成转头。换货却告知要半个月！一直信赖京东，一次不爽的购物	-1
买回来一个礼拜，手机就关机后开机不了。后来返还给京东售后部没有下文 问找到客服一直两边推。 问客服处理结果。客服回答前后矛盾。	-1
买回来一周降价了 我吗有怨言 这电子产品 本身就是这样 但是经常死机 就是你们机器单问题了 最让我恼火的是 手机居然是别人用过的 我C 你们广告打单响 干点正事呀 别人用过的 退货 也没有关系 关键是打开以后 机身 有被摔过单迹象呀	-1
买回来上网搜一下才知道手机出厂日期是5月4号，现在都8月了，3个多月居然还有43%的电量这怎么可能，缝隙能插纸，手机以后绝对不能在京东买了，第一次买的魅蓝note，买回来居然是开机状态，要求换机客服居然让我证明一开箱就是开机状态，那你不如让我证明你ma是你ma容易点，到底用了5个月就剩半个屏幕能亮了，以旧换新才给*E卡，E卡买的手机居然又是这么坑，充满电浏览一分钟网页就能掉3%的电，一局开心消消乐能掉2%，那我还怎么用，客服又让我去售后开证明，又不就手机收走15天，我都换成小卡啦那有那么多小卡手机呀	-1
买回来就出问题，去三星检测居然主板都有问题，劝朋友们还是别在网上买这样的东西，还是要去实体店买	-1
买回来就是阴阳屏上阴阳屏，上红下绿。京东确以边缘一个针尖大小肉眼几乎不可辨的划痕拒绝退货的送货。打数次电话都没人管。这就是京东所谓的服务，所谓的尊重消费者。从来没用过的手机有极细微的划痕就可以逃避售后。	-1
买回来没用几天时间，液晶屏就坏了，打电话给客服说不在保修范围，我也是醉了，	-1
买回来用就开始死机一天死机重启十多次，好吧我拿回去三星售后开个检测单吧！检测单开好了证明手机有问题，他爸妈的退换货竟然要15天，反正我都无力吐槽了，早知道我直接7天无理退款了	-1
买回来的时候发现摄像头掉了一点漆，想想就算了吧。没太在意。可是用了几天发现屏幕上有个小伤痕。这几天越用越生气。每天保护的好好的从来没有碰过磕过。哪来的伤痕。再这样下去下次还能不能在京东买东西了？	-1
买回来第二天耳机孔就出现问题，接触不良。现在换货中，希望换个完美机	-1
买完，没几天就降价*，钱行列谴责加鄙视！	-1
买完不到16天就降价了*块钱！！！！我去年买了个表，*块钱呀，*块钱呀，我靠！！！！！而且现在64g的用完优惠券后竟然和我当初买32g一个价位！！！！！我真的很不爽，不爽！！！！！！大家说三星不保值是对的，不要买三星，后悔没听大家的，还是买苹果6吧，我想骂人，太坑人了，骗钱，现在是140，往后不知道骗我多少钱！！！！！！手机还特别热，用一会就热，买三星不怕热，怕热不买三星，这句话是对的，曲屏没什么大用，就是来电闪光还有滑动显示时间和信息（但是每次需要手指不断滑动半天才能显示出来，有这时间我都可以打开待机键解锁看东西了），肺腑之言，对天发誓，千万别买s6eage，就是照相清晰点，花这么多钱买s6eage就是为了照相清晰这个功能想想就觉得很不值，买了就是坑，坑人也坑钱，买苹果6吧。千万别买三星！！！！！！京东快递员倒是挺好的，给好评，商品一分都不想给。	-1
买完以后送多一个充电板	-1
买完就便宜那么多！！！！！！！！！！！！！！！！	-1
买完就降价，晚了几天没评价，就看到降价了，真是不知道说啥好了。	-1
买完就降价&hellip;&hellip;	-1
买完掉价.......................................................................................................................................	-1
买完第三天降价1000，呵呵。京东这售后和什么价格保护都是假的不能再假了，就这样的企业难怪竞争不过别人。	-1
买完转天就降价，而且是翻修的！大家买之前考虑好，而且退换货相当麻烦	-1
买手机不送无线充电器就算了我问客服为什么他要我找商家我以为是三星技术顾问，三星技术顾问说这直营店要找就找客服，我在找京东客服说结果立马闪人第二个客服也是!后来气不过打算退货后来想想就算了！何必跟狗计较呢！劳资不差这280！这是京东最后一笔生意！	-1
买手机时，遇到非常不愉快的经历，京东做法让人伤心，但是三星客服专员，态度很好，积极处理好问题，赞一个	-1
买手机第十二天手机从一尺高的沙发掉下去，屏就坏了，还带着手机壳，一点不夸张，太脆弱了，还是建议大家不要买呀，这种情况还不保修，换个屏要1300多，无语了！彻底对三星失望了！！	-1
买手机顺便在京东买了贴膜，钢化膜用了不到一周就裂开了，再也不相信京东了，京东售后不给换，三包写的什么一1周内质量问题包换，都是骗人的，京东质量差，售后服务更差，差&hellip;&hellip;	-1
买时明明标的送移动电源，来了却没有，搞什么	-1
买时是铂光金，送时是白色的，说了补回为什么这么久没消息？	-1
买来16天就坏还不给换只能修，修了20天才修好气死人了	-1
买来20天相机就故障，已经返厂，现在还没到	-1
买来三天，出现多次死机，不知道是不是中奖了	-1
买来今天才打开，就感觉像是被人用过的，擦，那个充电器外包装都磨损了，我也就忍忍了，卡针插孔，明显被插过的，开机有吧嗒那种声响，像保险丝烧掉的声音，手机开机不应该有这种声音吧，不知道是不是维修机，生产日期4月12号的，拨号键输入一些数字也没有反应，感觉自己被坑了，晚上拿去售后检测下，修手机的朋友说网上不靠谱，我。。。。。都是泪	-1
买来刚开机就发现卡的不行，连打电话按键都卡，所有APP按钮都点很多下才能点开，更坑的是连屏幕都划不动！也不知道是卡到极致了还是有什么隐藏设定！秒退货，再也不会在京东买电子产品了！	-1
买来就后悔了，真心不怎么样，用半个月了，机子好卡，要不是老婆喜欢，打死都不会买三星手机，还卖这么贵，跟2000的手机没区别，依旧那么卡，反正我是不会推荐身边朋友买三星的任何手机的	-1
买来就有卡槽就有问题，三星不给换货！自己去店里换了卡槽，还好京东给报销，屏幕有缝，白纸可塞！不愉快的一次购物！	-1
买来拆机背面字体模糊	-1
买来用几天就后悔了！手机玩游戏可以说很发烫！垃圾曲屏，有谁要便宜 出售，	-1
买来的时候 出厂的屏幕贴膜不是原装的顿时心里一紧 开机不用注册激活 还有豌豆荚 唉 不多说了	-1
买来的时候没有送手机壳，而且手机的原装充电器一直不能快速充电，客服各种推让我去维修站，维修站让我返厂！手机壳找了他们好几天终于给补发了。充电器的问题都一周了还在互相推！刚买手机才几天啊就让我返厂维修。差评以后不会在京东买东西了。客服就是一帮踢球的互相推脱责任也是够了！！！	-1
买来第二天就掉了*元，有种被骗的感觉。和客服商量他们不愿意补差价，送个膜都不愿意送，以后再也不打算在京东买东西了，	-1
买来过一段时间就降价了，真心不爽，差评	-1
买的 64G版本 6688,过了不到一年，今年的s6edge+ 64G版本只要 6288，略无语，送的东西除了无线充电板之外全是垃圾，再无语	-1
买的很后悔，会滑动屏幕错误碰触	-1
买的早亏的早，才隔了1周，白条12期免息没有，手机壳也没得送，郁闷&hellip;	-1
买的时候5688 买回来第一次是屏幕出现小黑点，返修 花了我半个月的时间 好不容易拿到手机 后盖因为拆机了胶没有粘好 找客服 客服问我有没有问题 我说home键按20下 可能有3-4下不灵 客服又说返修 从5月29到现在6月22号了 中途给我打了一次电话 我也查询了一下 到现在也没到 还有就是现在价格已经降价800了 可以告诉我为什么吗？心里非常不高兴 真心的	-1
买的时候6088用了20元代金券，手机到我手里的时候便宜了800，跟售后找差价反了480元现金，那三百说给优惠券，都气死了，买的时候又不是没付钱，退差价的时候就退优惠券，太不厚道了，还有这个海南志行快递，太坑人了，比蜗牛还慢，同时买了一条裤子都快穿破了手机都没到，一个月吖	-1
买的时候写白条免利息，现在发现多了392的手续费，真是骗人	-1
买的时候啥也没送，到现在坑死了，早知道再等等入手了，	-1
买的时候是12期免息，后来要还的时候一看竟然有手续费，咨询客服说没有支付界面截图的话不行。我买东西还得截图？奉劝大家买东西记得截图，要不*不认帐，我特么当花钱买个教训。	-1
买的时候没有无线充 居然不补发	-1
买的时候没有无线冲送 买完收到货就又用的送了 京东你给我补个码	-1
买的时候用张减100的券，过了两天出了张减400的券，7天内，像客服索要差价，客服不给，真不知道钻石会员有什么用。	-1
买的时候讲的是618促销价，这还没有到6月18号，又降了近*块，真坑人	-1
买的时候赠品没有了，收到货赠品又有了。。。。。。。	-1
买的时候还挺喜欢的。 买回来之后因为京东产品说明，都没有说明质保贴怎么去贴。要不要小心保管。 手机买回来的时候打开包装，质保贴不小心弄丢了。然后反应客服，客服就给补发了。结果不会贴，贴坏了。 在给客服反应，找各种理由和各种借口。总之不会给你补发。那我的手机就不能享受保修了吗？？？？？？？京东售后真心差！！！！	-1
买的这台有品控问题,卡槽一边高一边低,home键金属环有划痕,不知道是三星的问题还是京东的问题!	-1
买的铂光金，打开是银色的，客服打电话还要我买服务，一颗星都嫌多	-1
买着假货了～头一天收货没注意，下了各种软件，电用的差不多了，，晚上睡觉充电，醒来一看还少了，靠，接着就退了！几天后说外壳有伤，卡槽不到位入不了库，我去了！入不了库怎么出的库！！！！质量还有问题！到现在都没动静了！再也不买京东自营了！	-1
买贵了 本以为京东是可以信赖	-1
买贵了很贵，手机不错，不想退了怕遇到别人退的或者其他，本来和客服商量看能不能买新的，退回新的，这样就可以省很多，主要实体那会都在五千＋，要不真想退了，死活不同意结果别人成功了我不行就这还想要好评，	-1
买这个手机的时候，本来苏宁是比京东便宜的，但是京东商家说送俏江南500块充值卡。冲着这个卡我才在京东买的手机。天哪！！吃完俏江南结账的时候人家说这个卡是2015年的！！！！原谅我说句脏话&ldquo;XXX&rdquo;	-1
买这个手机简直一波三折 不知道怎么说 买第一个 摄像头闪光灯上面没有密封 退货换货 换来的那一个屏幕右下角有个巨大的黑点 简直不知道还能说什么 真是不知道他们是怎么让这些残次品出厂的 我严重怀疑618的大减价活动 是从二手仓发货 换了第三个 终于正常了 我不知道以后会有什么问题 诶	-1
买这个手机说实话，是我6年网购生涯最折腾，也很无语的一次，跑了两次维修点才把事情解决。虽然客服对于手机的了解程度不够，不专业外，不过还是以不厌烦的态度，耐心的解决问题，这点还值得赞赏，希望客服专业些，不要动不动把复制的一搭段话发过来	-1
买这个要了解，这是移动定制版，会有一个问题，就是在同时插有移动联通两个卡的情况下，只能用移动的4g网络，换卡糟也一样，默认就是移动4G，没得切换的，切换的话只能用联通2G，如果只插单卡就没可以用联通4G	-1
买这手机降价不说，送的意外险，抱了一个多月都还拿不到钱，估计是骗人的，大家买京东上的东西时要注意了，他们的意外险是保险公司的，不是手机厂家的，赔付周期最少2个月，还不一定能陪给你。	-1
买这款手机完全是因为老公喜欢蝙蝠侠，预定时，宣传页面上说可以使用0条件24期免息白条，担心有问题还咨询客服，是不是都能无条件使用，得到的答复都是&quot;没问题的,可以使用&rdquo;，也没有人说你们京东白条是不一定每个人都能开通的，到付款了，告诉我白条不是每个人都能激活，让我咨询你们京东金融，好吧听话的咨询，客服给了一堆方法让我去试，听话的又去了，然后还是不行，我说那不成就退货，客服说退货订金不退，我说我知道，但是你们在宣传的时候的承诺也没有遵守，我觉得被骗的感觉，说实话不是付不起尾款，但是你商家的承诺根本不遵守，真心不想买了，多次联系客服，都没有给我一个答复，最后说给我联系专员处理，问过老公他还是很喜欢这个机子，在支付尾款最后时间给他买了，付款前还跟京东消费者维权电话客服沟通过，也告诉他专员一直没有跟我联系，直到到货前一天专员才跟我联系，时间都已经晚上8点左右，一看我已经付款了，…	-1
二手后封的机子！！！标签有两层！	-1
五个字！烫 烫 烫烫烫	-1
五月份的 二手 不说了 屏幕边缘有缝 退也麻烦 将就着用	-1
五月份的机器，大家看着办吧，不多说	-1
产品不怎么样，做工真是水的很，中间缝隙能塞纸进去了，指纹解锁真是垃圾到底了，经常识别不出来，半天解不了！自带输入法卡死，慢死，换第讯飞输入法一个样，卡顿。Samsung Pay 指纹支付一直失败，形同虚设！自启程序太多，内存被占了大半，一点儿都没有旗舰机应有的流畅度！信息内容只显示2/3屏，看着就不舒服。对不起5688的定价！	-1
产品不错，但服务却让我永生难忘。我信赖了三年的京东居然骗我，这是我没想到的。也是让我对京东的失望，我再也不会在京东买任何东西了，希望以前喜欢京东的朋友也要小心了。	-1
产品很好，这一星纯粹是给三星和快递小哥的，京东的销售真心是玩文字游戏，买的时候说可以先白条后免息分期，也没说要什么条件，买完了到白条分期界面看又没有免息了，客服说先要抢免息券才有免息！本来就没打算分期，只是这么一搞有点被诱骗购买的感觉！	-1
产品感觉很次，很像翻新机，屏幕色彩也很淡。质量也是边缘缝隙很宽，感觉像是刚组装上去的，查询不到条码和串号。充电手机很烫！各种不足，还比市场价高出几百！不值的&hellip;	-1
产品收到，手机是很漂亮，别人的包装是礼盒，我的却是一个小纸箱，更不愉快的是我添加到购物车赠品是有无线充电器的，寄过来却是没有的，找客服还说是我下单就没有的，欺骗用户，亏我还是金牌客户。气死人了	-1
京东 你的品控能好点吗。 你的膜都没撕里面封条就那样的。能告诉我咋弄的不。 明大明卖二手啊。 真是失望透顶。 买的时候一起买保险不能分期。说可以续保险。我买了。回访告诉我特惠的不能买只能买起*的两年全险。这就算了。咨询下货物情况专员电话一个劲不来。自己打过去有推三阻四时间没到 明天之前才有专员来处理。我好歹还买的会员plus。就这待遇。这推那推。 着急用手机给人发的这个莫名其妙二手货。让人咋敢开咋敢用。幸好你们发货都有编码备案。自己查查 省的在被你们说我诬陷你们。 烦透顶了	-1
京东 真他 ma 的太坑人了 刚买就掉*， 老 子 还是京东的钻石会员， 顶他 麻痹 的用，以后不在京东买东西了，我劝大家也不要上当了	-1
京东，不是东西，这次买的是三星s6edge,大家千万不要在这里买，商家坑人没有商量，qipan我们消费者，彻彻底底的大骗pianZi。我是17号下的订单，将订单一分为二，收到手机及赠品后发现没有无限充电板，联系客服，等到第二天才联系，说问下发货地，今天回复说发货地邮寄了，我当时要求看视频，他说按规定不能发给我们！说可以给个10元什么券，卧槽，安慰奖吗？当初买手机就是因为要送这个充电板才在网上买的，要是没有寄手机消费者也只有承担了。打电话的时候正麻将，害得电话中输了**！各位，千万不要在京东上买，虽然送了膜，三星店都说不能贴，还花了一百贴，昨天一去了解，其实实体店都要送充电板，送膜的。京东，大pianzi，太他made坑人了，极度不愉快的一次购物体验，从今以后，绝不买京东的任何产品。本人申明，绝对没有收到充电板，绝对没有无理取闹，否则不得好死！	-1
京东6.18！宣传真给力！原价5688优惠完5288！交完钱拿到手4888！你们真**的缺大德了！东西挺好没得说！这种手段不觉得有点卑鄙吗？不过也是！你们京东卑鄙惯了！	-1
京东上买东西 最失望的一次 26号下单 第一次送错地方 等了好几天 送来屏幕是坏的 换新到现在没消息 打电话就说让等 现在京东服务就这样吗	-1
京东买东西真的越来越闹心，竟然封账号，	-1
京东买了这么多手机最差的一部，手机网络太不稳定，2G一下满格一下又直接断网，结果就是经常漏接电话。到网络不好不坏的地方完全不能联网，同张卡同地方用在同事的7E上就正常使用，拿到售后去检测 垃圾三星售后连个检测的仪器都没，只是用他们的电话卡插上到附近试了试手机网络状况就完事了，这手机在周围网络好的情况下，是一点问题也没有的，所以他们也检查不出个什么来。	-1
京东偷换赠品！欺骗消费者！	-1
京东卖次品，后摄像头是歪的，经常掉信号，现在换货还麻烦死了，主机都被三星收回了，还要寄回去配件京东检查了再发货出来！！！手机卡剪了不能在旧手机上再继续使用，至少耽搁6天！ 这是最差的购物体验！	-1
京东卖的东西垃圾的一逼 用几天之后卡的要死 估计可能是翻新机 签收第八天又掉价* 一样的价钱 看不到机器质量 还得等两天才能拿到为什么还要在京东买 真么失望的一次购物	-1
京东商城就是店大欺客，抢了24期免息卷，东西抢到了，优惠券不能使用，最后变成付利息，打电话就是客户问题。请大家买东西小心。	-1
京东商城网购以后注意点，别被忽悠了	-1
京东坑人，刚买了6天，就降价了，我要退货	-1
京东够垃圾的，发个闪光灯已经挨划伤的手机给我瞬间什么心情都没有了，算了也懒得换了。直接差评！	-1
京东太不地道了，预售什么优惠都没有，并且手机还有毛病。最后就是一个大坑	-1
京东太伤人心了，最早预定的用户发货速度和买现货的一样，我忍了，预购用户不能用e卡我也忍了，预定用户退货不能退定金好吧反正我是忠实粉没打算退货，但是你特么又来一出多送个u盘和拍立得是几个意思，变相降价？还是把预定用户的感受当空气，最忠实的用户就是你用来伤害的吗？我算是京东接近五年的老用户了，这是头一次被恶心到，我觉得很失望。	-1
京东太坑了吧，5月没有活动的时候5688,618活动直接掉价800度，这不是坑消费者吗	-1
京东太坑人了，第一天11点的不送无线座充，买了有划痕，还不给退货。	-1
京东太垃圾了，买来高温黑屏，因外壳摔花一点居然说不保修，坚决打给315求维权	-1
京东太让人失望，最后一次购物，说好的赠品呢，你们的承诺呢，	-1
京东客服真的越来越差了。。。不想说什么了。只是让客服和他的同事反馈而已，客服说反馈不了而且同事也不管这个事情，在结束通话后根本不让你评满意度，他可能是知道自己没有让用户满意吧。。。。	-1
京东对客户太不负责了，欺骗消费者，明明官方有送*元的无线充，就给送了张100不到的内存卡了事，打电话，又专员又主管又经理的，最后了解情况后又说等几天回复，到现在还没有给个答复或者补偿方案，好失望，必定@刘qiang东，也不想等你们的解决方案了，直接评价，直接了事。 不过机器确实可以	-1
京东就是个垃圾，售后都处理不了，还做什么电商啊， 大家不要在这买这个手机，售后不行，没法沟通！！！ 还是去专卖店买吧，这是良心话。 差差差！！！	-1
京东就是个垃圾，骗客户	-1
京东就是骗子、我5月底买的手机忽悠我送无线充电宝、到最后说7月10号以后发、都是骗术	-1
京东就是骗孑，说好17号下单送一年意外保险，货到没有客服都是SB态度很差。差，差，差。京东大骗子。	-1
京东已经不是原来的那个京东了。第一，大标签覆盖小标签，京东回复说正常，我的认为是别人退回去后又拿出来销售的，大家看看图片。第二，手机确实存在屏幕松动翘屏，我买之前看评论有很多这情况，我不是很信，因为我还是很相信京东，结果我也中标了。第三，现在京东发票也不给了，现在想换不给换，想退又没发票，哎，算了，不想折腾，就算给大家提个醒吧。总结:东哥结婚后已经变心了，各位买家须谨慎。	-1
京东强买强卖，真是没想到被自己碰上了。 收到手机之后，后置摄像头发现有算上，立刻联系了售后申请退款。 结果收走手机之后态度就180度转变，说什么收到了残次商品不可以办理7天退货。 京东，强买强卖有一手的啊，要不怎么说是*呢。以此为戒，谁在京东上买东西谁倒霉。	-1
京东彻底的堕落了，不诚信！这是我最失望和极不愉快的购物！失信的京东，一切都无从谈起！	-1
京东快递确实给力，虽然包裹让其他人签字领走拆包了！但是快递小哥只用了20分钟就把打开的包裹追回来了!很强势，给点赞！手机暂时没碰到网上说得问题，物流其实挺好了，如果没被人领走这波我给10分	-1
京东快递第一次让我失望，武汉本地仓库发往武汉市区2天才到，手机发热严重，至少不是买断货了吗，我收到的手机是4月20生产的返修机还是？好歹也是*的手机充电线和耳机的线尽然这么细，为切莫这么细呢？*滴手机包装和如此简陋一点防护措施都没有，失望的一次购物，京东真是越来越让人失望。	-1
京东怎么了，我的魅族都可以无理由换货，为什么三星不行，也不是退货，什么情况是不是有意欺骗消费者？	-1
京东无得，客服稀烂，差评先。	-1
京东明显坑。618买5688 622买就只要5288.同样的赠品。降价了还不给价保。说是有赠品。操他的 618花了老子10000 买了一个上当受骗。。	-1
京东是个大骗子，购买时显示有无线充电器和手环手表，收货时就没有。是欺骗行为，我们一定要向12315投诉，状告京东，违反消费者权益法。	-1
京东是怎么回事。今天刚收到的S6 打开包装就看到home键都陷进去了，一边高一边低！	-1
京东服务太烂了，买商品的时候咨询了，要开增值税发票，材料也上传了，结果一个月了还没给增值税发票！！中间咨询了客服无数次，都是让别急，先等等，612号的时候说1-3天可以邮寄给我，今天623了，又说需传什么委托书？！中间过程没有任何主动联系客户的动作，这就是京东对一个钻石会员的服务！！！！差评，特别差！以后远离京东，还要找12315投诉！！	-1
京东服务质量直线下降了，下单已经半个月过去，机器已收到，赠品无线充电器居然连货都没有库存，还没发货，但是系统又显示有的，骗子啊！	-1
京东爱回.收太黑。我的6s屏幕碎了，京东爱.回.收报价*，想想修不如换。2016年7月27日上午9时 短信提示他们收到手机，同日上午11时短信提示他们质检完成，会有工作人员与我联系处理。我当时就纳闷干吗联系处理。质检完成直接给钱不就得了。 然后就等了2天多时间，没有电话。我联系京东爱.回.收，客服说已催促，会尽快联系我。 一小时后，有工作人员说报价调整到了2490。我说质检报告给我看下，他说需要拍照，等待2个工作日。后来把价格提高了50元，变成了2540.和之前报价差了360元。我斟酌了下，这两天里不知道会对我手机干了什么事情，不想再折腾就同意了。但心里感觉京东爱.回.收好黑。网上说的&ldquo;到手刀&rdquo;是真的！京东太令人失望！ 我把经历写出来提醒朋友们京东爱.回.收有风险，回.收须谨慎！PS：图就不上了，京东肯定不然通过审核！	-1
京东物流太烂	-1
京东现在是不一样了，店大欺客啊！！！ 11月1日下单购买的手机，赠品充电环迟迟不发，期间以次充好发错两次，全部拒收，时隔一个月后询问处理结果发现京东已经私自改变了赠品的描述，由&ldquo;颜色随机&rdquo;变为&ldquo;型号随机&rdquo;，这是玩的什么文字游戏？敢问价值相差几倍两种东西如何随机？抽奖吗？期间多次与客服沟通无果，沟通进行不下去就换个人过来要求把问题全部重新描述一遍！ 手机本身没问题，但是这是三星产品本身没问题。京东的品牌信誉又在哪里呢？ 强烈建议各位在购买产品的时候仔细阅读各项条款及内容，避免落入文字陷阱！	-1
京东现在连信誉都没有了，上面写的送充电宝和保护壳还有膜，结果只记回个裸手机，手机还没用，待评价	-1
京东的东西小问题很多，不靠谱	-1
京东的售后让我无言以对，已经转售，差评。	-1
京东的手机，真的是不敢买了。掉价快不说，问题多。检测换机的时间都掉了大几百，一点补偿没有，也没有备用手机给你，给日常十分不方便。垃圾	-1
京东的手机真心垃圾，刚1个多月就开不了机，花了5000多的价格买的，怕出现二次这种情况，就跟客服咨询退换机，哪知道不给我退换货就算了，居然叫我自己去附近找维修点维修，然后居然用新消法和三包法来压我，我想问下，难道机器出现这种问题，我只能人气吞声	-1
京东的服务太差了，5月26日买的手机到6月13日没收到发票，问客服，先后5个客服网上咨询都未果。竟然告诉我说发票已经在5月14日签收。都要让人笑掉大牙了，5月26日才订货，居然京东就是神机妙算的提前给我开出发票寄过来。真的是太牛了。看来京东真的和别人说得一样越做越差了。	-1
京东的活动很坑人！现在买比预约的多一个蓝牙耳机，虽然不值钱的东西但是心里不平衡，预约说明对你们的信任和支持，可你们的活动就坑老顾客。	-1
京东真垃圾，上面说500元返卷，结果一分都不返，问客服，一个劲的给我发图片，说赠品有限，赠完为止，真幽默，京东卷会赠没？姐姐，咱不闹行吗？客服解释来解释去，没有一句在点上，说白了，就是不返卷呗？不返卷你写什么下单返500京卷啊？我去哪买都比你这便宜啊！现在京东越做越垃圾了，店大欺客，误导消费，垃圾！	-1
京东真是太让我伤心了，我这么忠实的客户，一年要在京东消费几十万，几乎所有东西都在京东买，现在竟然把我账号封了，原因是我买多了，	-1
京东第一次差评 买安卓手机是我今年最后悔的事 入手三天 系统不流畅 经常遇到卡顿 侧边广告推送难删除 半小时掉电10% 手机发烫严重	-1
京东网上有无线充电器却不给发货。骗子网。差差差差差差差差差差，大家不要上当。	-1
京东自营为何不开发票？怀疑不是正品！	-1
京东自营我真的长知识了!赠品尽然不一样。	-1
京东虚假宣传赠送物品，变更赠送物品，物流变慢，送货人员效率低下，服务不好，客服只会扯皮，没有实际作用。京东走下坡路咯！	-1
京东购买的这款手机活动打白条太坑人，明明说的免息，可等着还款时比利息还高，手机也没法退货了，客服都不给解决问题，一年下来得多还好*，太太坑人&hellip;&hellip;	-1
京东购物体验太差，等了半个月才发货不说，赠送的无线充电器现在都没发货	-1
京东越做越不好，我这个钻石会员对京东太失望了，s7 买回来10天左右才发觉桌面程序和图标自己会不停打开，我想关掉都关不来，关机重启就没事了，5688，心疼	-1
京东越来越垃圾了，那些优惠卷都是摆设吗！完全领不到！	-1
京东越来越虚了，活动也越来越假了！	-1
京东配送没的说很快 服务态度很好，手机到手一个月，屏幕碎了，放在兜里拿出来两三个碎点，就算有可能是钥匙什么硌到了，可同在一个兜里的苹果6一点事没有，苹果还是夹在钥匙和三星中间，同样没有摸，三星怎么就这么脆弱，问客服，直接让我1500换，不问怎么弄的，也不考虑下屏幕质量过不过关！最早用过三星，那个卡，近五年一直苹果，好不容易说买个三星试试，就这用户体验，三星质量跟客服解决问题的方式真的nb！！！我再也不会用三星！就这质量，就这服务，我是用不起了！屏幕也不修了，就这么用着吧，好好给三星宣传宣传！	-1
京东配送简直垃圾配送员	-1
京东首发做的太烂了，可惜三星这款手机了， 三个账户订了5台手机 ，3台有问题，不是系统问题造成订单无效，就是仓库拖10多个，20个小时不发货，从系统，到服务都太失望，客服也是推来推去，不正面解决问题，没能力就别做首发，丢自己的人!!!!!!!!!!!!	-1
人家都有送无线充电板的这家没。下次买去良晋了	-1
什么2k超清屏。还没有我的苹果开起来清晰，外包装丢嘎了不能换了、不过外观我喜欢	-1
什么也不说了。	-1
什么垃圾东西，昨天收到的今天就出问题。自动跳出窗口。	-1
什么垃圾玩意！呸你一脸！自己看看	-1
什么垃圾货，故意发一个烂手机还不带发票，退的时候还退不了，电话接听不清楚有噪音，屏幕还乱跳，再也不在京东买东西	-1
什么手机用了一周手机开不了机了	-1
什么玩意 喇叭都坏了	-1
什么玩意，下单前赠品是 无线充电器，手机壳等等，怎么莫名其妙就变了呢，非常不开心的一次购物，我在京东购买这么多年了这次真的让我很生气，后果很严重	-1
什么玩意，就差两天，少了两个赠品	-1
什么破京东，刚买时候6600不到就好就降价到5888	-1
什么破几把手机，太烂了	-1
什么破手机，我才用4天，手机就开不开机了，不讲了，手机已退	-1
什么破手机！用了不到一个星期就碎屏！垃圾！建议你们不要买！	-1
什么破手机信号差的太厉害了 生气	-1
什么破手机啊，简直差差差！有听说过防水手机里面有水的吗？客服就是推卸责任，为什么新的手机内部会有水，拿去售后说是我弄水进去了，妈的，手机都没怎么使用，因为有水不知道的情况下充了电导致主板也烧了，叫我花2000块换个主板，气人，真是花钱买教训，以后不再用三星，再也不在京东买货，卸载京东！这*就当喂狗了！	-1
什么破玩意，之前买过一次，由于老是自动重启，退了。这次又买，黑屏！退了。不是京东的东西就这样糊弄人啊！建议千万别买！	-1
什么破玩意，垃圾的不行不行的	-1
什么质量破三星手机?大家千万不要买，没用呢刚到2天屏幕就碎了！	-1
什么都没送，大礼包也没见着，用了两天才来评论，什么都好，就是右下角的屏幕和边框高差好大！电池超级不耐用	-1
什么鬼东西！明明写着12期免息！我选了12期分期&hellip;&hellip;还跟我要利息！明明就是陷阱。4月的时候说12期免息活动做到月底！4月 13日赶紧下单！快五月了，走出来5月免***开始坑人了！&hellip;&hellip;	-1
什麼京東打白條，什麼優惠券，分24期免息，給了首付第二次就要你全額給，態度極差，不人性化。	-1
今天刚打开手机 能发短信 收不到短信 怎么办	-1
今天刚收到手机，发现左侧屏上有一个豆大的斑点，这种有明显瑕疵的手机也能出厂？严重怀疑三星的生产质量控制。大家看看。马上退货！！！	-1
今天发现降价，618活动没有优惠反而5688呵呵哒。还说有赠品？赠品不是我们自己拿钱买的吗？算什么赠品？？不让价格保护。这种事情不是我一个人遇到。大家好自为之。钛泽银看来看去像金的。	-1
今天心情五好，差评，差评，差评，差评!	-1
今天收到的手机，拿出来一看屏幕左下角就有黑点，反馈的人这么多，他们当没事一样。京东这样不亏钱都不可能。	-1
今天是第五天，手机经常会出现卡机现象，感觉不值	-1
今天是购买手机第18日，手机主板已坏，正在维修，服务中心的技术人员鉴定是产品质量问题，建议不要在京东购买这个手机，因为京东修改了手机里面的网络信号，这个是服务中心的技术人员拆机检查发现的，也就是说，你购买的手机已经被打开过了。	-1
今天终于收到货，不明白他弄预定干嘛，明显坑人吧，预定都比没预定的晚拿到，退货还要定金没收，早知现在买都没啥事，害我的热情都没有了	-1
今日手机终于到了，怀着激动的心情拆开包装，哇！好多赠品呀！拆开手机包装，终于见到S6的庐山真面目了，激动的开机，唉！开不了，可能没电了，我想着，赶快插上电源充电，没反应，等等，我想着，过了一会，还是没反应，我终于明白了，草，手机是坏的。	-1
从10月24日办理退货到11月4日都没有任何反馈，这就是京东对待退货的态度，而且还是这个手机无故黑屏，自动关机的原因造成我退货的，手机从23号晚上6点开始就再也开机不出来，导致我很多账号都是在登录保存密码状态，连删除都没机会。。。。。。就是这样的问题，还手机一去不复返，到现在都没结果出来，并且给我造成很大的通讯不便，我需要一个说法。。。	-1
从6plus换成edge真是最失败的决定，除了外观好看其他各方面完败，尤其是这电量真心，╮(╯▽╰)╭	-1
从分期免息系统出错开始，一路过五关斩六将，惊险刺激，京东客服和金融客服说法不一，论战300回合终于要回tui款。购物需谨慎、勿轻信京东。	-1
从前我就缺心眼，一直缺，自从买了s7以后，嘿嘿，，，我变机灵了，一个破手机才才多花 了不到2000，真的值。	-1
从拿到手机第一天，我去移动补了一张4G的卡，经常显示 仅限紧急通话 每次这个情况就完全接不电话，耽误了我不少事情。每天大概出现这种情况3次，我只有每次调飞行模式然后在调回来，才有信号！起初以为是卡的原因，可是换了卡还是这样，不知道是什么原因！花了6000多买的手机，基础的通话都不能保障，我真是无语了。虽然想过寄给京东去维修，但是大家都知道，修过的手机更容易坏，保不住还把零件换了。烦死了！	-1
从昆明到香格里拉用了10天！这都不值一提，关键是被人代签收，也不给我发个短信更不说打电话了，几千块呢？我特么一天才挣50块钱，还不是天天能挣到！这买的那是手机，是心跳！我本人没收到东西却叫我晒单评价！这是专业送货的水准吗？业余的都比你们强。	-1
从来不给差评的，忍不住了，电池太不经用了，一会就没有电了	-1
从来没用着过这样的手机，用一个月就开不了机！！	-1
从首发到现在三个半月一下子降价八 百，太它嘛坑了！	-1
付款后等了20天，答应的五天到货。一点诚信都没，一点补偿都没有。下次，没有下次了。	-1
以为双12会有活动，等到12点多还没有。本想白天再看看，上午下单时还没有赠品，结果下午就有了，可是已经收到货不给补赠品，退货还要自己花运费，坑啊	-1
以为是双卡的，结果时间晚了又换不了。	-1
以前有过2次不满意的三星使用经历，一台是Galaxy Tab,一台是Note 2。 但最近见一朋友买了一台最新款的S6 edge,把弄了一阵感觉很不错，以为三星终于有一款令人满意的产品了，所以自己一时脑热也买了一台。机子到手头几天感觉很新鲜，显示屏很优秀，摄像也不错；但用上几天下载了一些常用软件后，系统开始变得拖沓、反应开始变慢！最不可思议的是电池的跑电速度，早晨6点刚拔掉充电器，8点半左右吃完早餐去上班时发现电已剩80%多，问题是跟本就没用它！现在基本上每天最少充三次电,中午一次，下午一次，晚上睡觉前插上充电器，有时一天充三次还不够！！！真是垃圾级产品！！！！强不烈要求退货！！！！！！	-1
以前没用过三星的手机，买来用了一段时间觉得三星的东西做的真是太差劲了，不值这个价。先说硬件，1.HOME键有的时候要按两次才起作用，2.充电的接口有些小问题，有一次充电充了1个小时发现电量从43%才充到50%，一抹手机，我去，充电器的接口处烫的要命，幸亏没把手机弄坏，3.屏幕触摸不灵敏，使用单手单手玩手机时点击不灵敏概率很高。再说软件吧，对于手机最重要的是什么功能？毫无疑问，是打电话！三星的拨号功能做的十分不人性，操作太过繁琐，按下拨号按钮不能立即显示最近通话记录，T9键搜索通讯录没有按使用频率排序，左划最近联系人便打电话的功能很容易误拨，单手玩手机时来电显示的按钮显示在屏幕上方，接电话单手不易操作，再说其它软件，发短信时不能快速选取最近联系人，S助手太过烦人，提示信息太多，语音助手容易被误触发，有一次手机在裤兜里居然自己发出声音，吓我一大跳，原来是语音助手。反正是不建议大家购买，性价比…	-1
以前都是给的好评，今天买个这么贵的机子我自能给最差，只能说京东太扯淡，各种坑，不是说白条自动触发吗。但是白条未触发，赠品也不够，客服就是摆设，欺骗消费者，各种理由推脱。以后再也不会上京东购物了，三星其实没想的那么好看那么流畅，有时候要卡，屏幕颜色太鲜，看久了闪眼睛，电太快	-1
以后不会在网上买了，买了也得当时拆开仔仔细细的看好！	-1
以后再买三星剁手，降价太nm恶心了	-1
价格一个多星期掉了800，感觉被骗了，京东永远答复不退钱不退货没办法，很不愉快的一次购物，感觉不会再爱了！	-1
价格波动太大了，手机除了曲面和别的也没有区别，然而曲面贴膜让人无奈，感觉屏幕颜色有偏色发黄	-1
价格贵，做工确实垃圾，听筒上边框的缝隙差不多有2毫米，曲屏的黑变宽得吓人，唯一的卖点就是夜拍确实不错，但白天拍照发红，严重失真，不知道为什么还卖这么贵，被坑了。1星是给京东快递的	-1
价格超级**。。。价格超级**。。。	-1
优点：手感好，外观好看，屏显好，相机好。反应速度流畅，系统好用，上网速度快。 缺点：系统占用内存大，耗电待机时间短，SIM卡信号弱不稳定，听筒声音小，喇叭音质差， USB接口松动，SIM卡槽是朔料的，屏幕无法贴膜，不能扩展内存卡。	-1
会死机，会卡屛，有时反映不是很灵敏	-1
伤心，用了一个多月，现在右侧解锁键塌进去了，不知道找谁售后，其他都还好，怎么办	-1
伤心，这么贵的手机才用10来天就开始卡顿，手机顶部那个间隙很宽。严重怀疑是翻新机。	-1
伤心了，以后不再买了。刚买没几天降&，你让我们老用户情何以堪？还不能申请价格保护，两年前的京东真的不错，现在感觉一点也不友好了。	-1
伤心了，让买完就降价还是618买的还降这么多，算了京东也就这样了，去年双11买的主板以各种借口接口不给换新，返厂维修2次没解决问题才给换新，弄好了半年都过去了。13年就钻石，真心想不到。趁国米这事卸载京东转*了	-1
低分是给京东的，操	-1
作为一位三星的忠粉，从s3到note3到s6edge到钢铁侠版s6,对我伤害真是巨大的，三星一直用降价来提升销量，但从没有考虑过高质消费者的感受，居然是旗舰机，受众人群当然有所区分，毕竟不是苹果，品牌逼格过高什么群体的都会用，买的大多数人也不差这几百一千的，但你一降价消费者就会觉得手中的产品档次变低，三星因为这样流失了多少高质量买家，这次s6本以为是三星挽回消费者的开山力作结果note5还没消息32g暴跌接近*，哎，难。	-1
作为京东钻石会员和会员plus，我不得不说说这次购物体验。4月8号晚上下单用京东白条付款，选择使用12期免息券但还有利息，我取消重新下单还是这个问题，跟京东客服打电话，客服也说我用了免息券但不知道怎么还有利息，让我第二天早上问京东金融客服，第二天我问金融客服，金融客服说是操作有误，我没用免息券，我就想不通作为一个老用户怎么连买个手机都不会用免息券了，并且操作两次都一样，这真是我的问题？好吧，我第3次下单确实没利息了，跟之前操作一模一样，这就不说了，我记得下单是黑色，结果后来看订单是银色，特么到货是金色，这又是怎么回事？这又是我的问题？京东服务越来越垃圾，伤的是众多用户的心。运费越来越高，服务却越来越差，下年不会再买会员plus，买的什么服务！	-1
作为忠实的钻石会员，这次的购物体验必须给个差评，手机预售火爆到货慢就不提了，不是京东的原因，但是收到的手机 是开过封的，这个不得不说。手机盒子的封签破损，直接用一个新的覆盖贴住，不用心还看不出来。仔细看，屏幕也有一条轻微的划痕，懒得退换了，不影响使用但是心里肯定不爽。另外，赠品里的无线充电器明明有货，但是就是不发，非要拆分订单，当天买的可以211，提前付款的就需要等。手机用起来还行，除了发热没有重力门之类的瑕疵。	-1
你也太差了吧，才用刚好两天充电器就冲不起电了，接触不良不会吧？那么大的品牌，有意思吗？堂堂正正的三星是这样假冒伪劣吗？看看我的评价记录从来没有这样给过差评，这次必须差评，充电器两天就坏了，电池半天都管不了，京东一直信奈的品牌怎么会突然伪劣成这样？	-1
你们的手机出现自动重启么？ 有的时候打电话 或者微信语音的时候自动关机了	-1
你们说的原装正品在哪里，第一次买不带这样坑的	-1
你这个降价也太快了吧，没买两天就降了600，坑死人	-1
使用13天就屏裂，没摔过，没顶压过，不包换不包修...其实这也不怪京东，收件次日客服MM就告诫过我:S7Edge曲面屏易碎，请购买**2年延保(带碎屏意外险)。当时秉着对三星质量以及行货售后的一贯信任拒绝了客服MM...结果就杯具了...	-1
使用3个月，屏幕换了两次，手机是不错，还是建议大家去实体店购买，感觉京东这批货有问题~	-1
使用一个月,现在通话出现严重杂音 根本无法正常通话 垃圾！	-1
使用不到2个月，手机电量只能支撑半天了	-1
使用不到一个星期，首先手机很漂亮但是有以下问题存在，存储不好设置及切换，触摸屏有时候不反应，曲面侧屏设置为小的时候常常需要滑动很多次才能出侧屏，而且很容易和左滑翻界面这种功能相冲 最最差的，手机一不小心摔了，然后屏就碎了，什么鬼质量	-1
使用两个月 左键频繁自己启动 屏幕乱跳 没办法用了	-1
使用两周多屏幕无故出现条纹，上网查询这不是个例，而后黑屏无法使用，联系售后只能换屏不能换新，总之是一次很不愉快的购物经历，希望想入手的朋友再想想，样子虽然帅气带不代表用户体验	-1
使用了三天的心得：返回键和选择键突然不见了，经常死机，今天才去三星售后维修中心检测是机子有问题，但只能选择要检测单或者要手机，手机要退回去所以单他们不给！退货！是运气不好还是质量不行呢？	-1
使用了半个月，说一下感受，1：都说安卓的软件多，但三星的应用商城确实太垃圾了，很多垃圾软件；2：我怀疑电池是不是有3000毫安，怎么还没有我的2600毫安A7使用时间长，一天都撑不了；3：广告吹嘘的液冷似乎并没有什么卵用，快速充电烫，看电影烫，怎么还敢玩游戏。作为一个三星的忠实用户，下次不会再买三星的手机了，系统优化敢我天朝国产的差一大节，价格还死贵	-1
使用了近两个月 最终结果，我的个人感觉 是山寨的，手机屏幕90%是换过的，清晰度和我在实体店里面见过的差了不是一点两点 ri le gou	-1
使用了这么久，对这款三星s6很失望，首先，左键功能丧失，用看书软件功能，没有办法切到目录，使用微信拍照小视频，马上退出重启退出重启，关机了也不顶用，必须卸载了微信在重新下载安装。跟炒股软件发生冲突不兼容，根本用不了。还有莫名其妙的顿卡。最让人受不了的是商家送的钢化膜，一摸就碎了，跟自己后来买的钢化膜一比，跟地摊货没两样，期间自己的手机屏幕还刮花了两处，很不满意的一次网购，给返现也不会给你们好评的。实事求是的评论，请别打骚扰电话过来要求改差评，谢谢。	-1
使用几天才来评论的，对于这款s7手机特别不满意 ！ 1.曲奇屏幕两边触摸非常不灵，扯淡。 2	-1
使用刚一个月，屏幕出问题了，虽说免费换了新的，但心里恶心	-1
使用半个月先是充电器头坏了！耽误了三天换了一个！之后HOME键严重磨损我之前2000块钱的三星用了一年HOME键也没这样！客服还劲儿劲儿的让我掏钱维修！真逗了！	-1
使用第二天就出现黑屏！什么功能都正常，打完电话就黑屏了，关机开机都不行，后来充电也不行，屏幕就是不亮，什么都看不见，凭记忆记位置去关机，后来又自动好了，不知道什么原因！	-1
使用过程中和充电过程中手机都会发烫	-1
侧键按不动，特别卡，翻新机机器	-1
促销完了以后，马上降价，比促销还低*块。靠	-1
信。用 卡刷的钱 还没还 就碎了	-1
信号，纯粹垃圾的不能用啊，气死我了	-1
信号不好，充电发热，玩王者荣耀卡得没话说，还没老手机乐视的流畅还让我花了*，打电话都经常听不到声音，也是无语了。很多人说会误触，其实没那么容易误触的。谁想说我黑三星，那么我手机*你拿走才买了几天，直接降*出售了	-1
信号不好容易死机，才用2个月时间已经刷了一次机了，真心觉得垃圾	-1
信号太差了 售后太不好了 到现在也不给我解决什么啊都是。同款式手机 都是移动号码 再同一个地方 使用比我在京东买的手机好用多啦 大家不要在这家买了 太不靠谱了	-1
信号差 非常差，屏幕点击 非常不灵敏。简单说就一垃圾手机，后悔 这是最后一次用三星手机了，以后都不会在京东买了手机了，太差太假。朋友们 想买手机还是去店里买吧，别跟我一样上当，手机才用了一周，就这样了。钱掉水里了。。。。。	-1
信号差，待机时间短，已退货	-1
信号差，运行4g内存才有1点几g可用	-1
信号极差，不知道是不是个列	-1
倒霉的一次购物经历。今天方才开机使用就发现商品有问题。来电时，系统铃声自动默认为静音。太奇葩了。。强烈申请换机中，等待售后处理。。。。	-1
倒霉第一次买5千多的手机下载速度这么慢还不如小米手机	-1
假货，太坑人了，找客服还不说话，新机子刚用就死机，京东怎么开始卖假货了，还联系不上客服，太黑心了。	-1
做工不好，性价比不高，电池不耐用，发烫	-1
做工太差，屏翘开有缝隙，当天就退货了.	-1
做工太差劲了，第一台红屏幕+坏点，第二台边框和背后玻璃有瑕疵，但屏幕完美，顾虑红屏幕是通病而且不给开检测单，就忍了。三星啊快提升品控吧，旗舰机都这样真是无语了。	-1
做工差劲呵呵，边缝能插纸进去了	-1
做工很一般，屏幕有划痕，也懒得换了	-1
儍呀 做充不能用！	-1
充一次电，只能用一天，待机时间太短了！	-1
充电发烫，京东和三星叫我去检测，无语了。	-1
充电发热，不是热，简直就是烫了，急着用手机，也没去换货	-1
充电器充一次充不了，坏了，手机暂时没发现问题	-1
充电器用了2天坏了，手机用了20多天主麦克风坏了	-1
充电有时充不进去，手机有时会死机	-1
充电的时候手机太热，都快烫手了，不好啊，有点上当受骗的感觉	-1
充电超级无敌烫，电池还不耐用，今儿刚买的，一会就没电了，然后插上冲，没5分钟就显示百分之二十二点电了。也是醉了。	-1
先不看手机，物流不是京东自己家的吗？咋这么不着调用邮局吧手机直接放在信箱里自取呢？我明明就在家等货呢也不打个电话联系我下？发票怎么是晶东呢？	-1
先亮一星，新机收到开不了机，换机时间16天很不爽，刚收到换的手机还在用，暂时没发现异常	-1
先手手机&ldquo;本来想退的，但是想想太麻烦，太垃圾，经常通话掉线，手机听歌音质烂到家了，无话可说。*，真是够了。 再说京东：明明选择12期分期免费，结果还收取手续费，电话客户永远是买家责任，给你的只能一句话：对不起给您带来不好的体验。 垃圾京东，霸王条款。 奉劝大家不要买，而且更加不要在京东买。	-1
先说包装 任何填充物都没有 那个无线充电器脏了吧唧 预付款说是13号到货 结果16号还显示正在和经销商采购 今天一看价格还是那个价格。 赠品送了一大堆 京东最失败的一次购物	-1
先说手机，品控一般，一开机就发现屏幕内有一颗灰尘，两颗小杂质 再说京东，手机有货时说是抢购没赠品，我刚买完没10个小时就变成了可购买有赠品，不带这么坑用户的	-1
光运行一个微信，就烫，手机不行	-1
免息白条，忽悠了我多花*悲哀！	-1
入手1个多月了 屏幕突然有一条竖线 然后去售后 机器拆开后发现内贴码和机身码不一致！！ 这不是翻新的是什么？？？	-1
全一快递公司私自乱收费，投诉几次，为什么京东商城不闻不问！	-1
全家手机一直都在京东购买，这次购买两天就减价*	-1
全新的拆封， 频目有坏点，退换货 还要等7到15天严重对京东不满。。。。	-1
全网通的定义是什么？有电信卡在的时候移动和联通都永远2G，有受到欺骗的感觉！不知道选择这台机子的朋友们是否注意到�����	-1
六月底买的，一充电手机就发烫，然后就卡机，照相就无法使用，到后来相机就完全不能使用了，打开就显示照相机故障，要求售后，客服让我自己拿去售后网点，去了以后帮我恢复了下出厂就还给我了，用了不到一分钟就坏了。然后就没好气的让我回家估计是返厂了，一个礼拜了都没个消息，心塞啊。本来以为京东还是挺靠谱的，谁知道会这样~网购还是得慎重	-1
关于购买三星s6 edge+的经历。我本人使用的是 三星s6，后想给媳妇购买部三星s6 edge+，弥补这次情人节的礼物。我是首批预约，及时抢购的。下面看看我这次痛@苦经历:1.第一次的订单是8月31日下单，9月1日收货，订单号码9993094060,收货后给了媳妇，后被发现该手机屏幕有3毫米的坏点(注意看我的图片，在电源键附近)，申请了换货；该订单有保护后壳，无线充电器，充电宝，1年意外保障，发票齐全，包装精美，后将上述产品全部返给京东；2.换货，第二次的订单是9月4日发货，9月5日收货，订单号为：10019093599，手机收货包装简单，手机没有问题，但没有发票，没有了1年意外保障。期间没有任何人告知我。 我想说的是，同事苏@宁购买同款手机，还送了钢化膜，还有*卷，买完京东送的所有东西，再购买保护套，还有剩余, 目前，我这部手机等于9月5日才用上，且没有发票，没有1年意外保障&hel…	-1
关声音键不管用。可能是翻新	-1
其他目前没发现哪里有问题，安卓系统还是同样的不稳定，耳机今天有一只没声音了，八月一号买的今天四号这才几天，而且耳机买回来一直没用，就今天上班听，一会就坏了，无语。	-1
其他还好就是送的膜和屏幕差太多了，根本用不了！还不如没有呢！皮套也合不好，不知道用几天能不能好点！	-1
其他都不错，但是屏幕明显发红，不多说，看图片。看其他买家的评论，只有没拆包装的才能七天无理由退货，只能凑合着用了	-1
其他都可以，就是说好的充电宝为什么没给我，还自动确认收货了？	-1
其他都完美，待机太差。一天都坚持不到。没事不敢玩手机。就这样才勉强使用一天。	-1
其实挺伤心的，手机没有问题，就是京东预定的太恶心了。预定的都知道怎么回事。	-1
内存占用大，高清电影播放卡的很，电池烫手。	-1
内屏有 瑕疵	-1
再也不会买，居然是开封的	-1
再也不会买三星的任何东西，光知道做噱头，却完全忽略了质量，屏幕超级容易碎，用了好几个手机，从来没见过这么脆的屏幕，换屏幕还要1500+，真的，三星真的完蛋了，建议想买的，最好绕道，看别的手机，花那么钱买它，还不如华为的比较高端的手机	-1
再也不來京東買東西了，太冷了，昨天買的今天收到后就有活動，找客服還不退差價，一顆星都不想給	-1
再也不来了，买了手机送的壳子是破的，居然客服不理。再也不会买了。	-1
再也不用担心冬天玩手机冻手啦，	-1
最不满意就是只能用移动2G网络。在移动和电信时不能使用4G网 ，需要关闭电信卡才能使用4G卡。这还是双卡双待手机吗？最最不满意的一次购物。建议大家千万千万不要购买。还有就是没有任何	-1
最失败一次购物 没有之一	-1
最好别买，我这辈子第一次给差评，真的手机充电40.6℃呵呵，发烫发烫发烫。而且客服有一个尽然不理我。京东我真的希望你可以好好的选选商家。希望大家可以斟酌一下利弊	-1
最火大的是用顺丰慢件，特么的，四天才收到。付款的时候刚好上厕所，客服一直催付款，说什么耽误发货，结果给发个顺丰慢件。问客服赠品的图片也没有，结果都是鸡肋，发票是一个和的士票长的差不多的东西，也不知道有没有用	-1
写着12期免息，到还款时居然要分期服务费，打客服他们要证明当时不要服务费的证据，真服了，太让人心寒了，	-1
冲电不能冲满？	-1
冲电好烫。不是多满意	-1
分几部分评价: 1:手机硬件，没得说，各方面都是顶级的，屏幕手感，显示都能用惊艳来形容，五星； 2:系统，我一直用魅族，系统体验与魅族的mback 交互还是差很多的，只能说是中规中矩吧，三星； 3:价格，说实话，值这个价，不过刚买四天就有返现300的活动，跟客户沟通能不能退差价，未果，弄得我挺不爽的，所以价格这部分我给一星； 4:售后以及网页提示，我个人觉得提示做的不好，我看降价了，而且看支持七天无理由退货，我就想我无理由退货竟然不是完全无理由，而是你没拆过包装才能无理由！各位注意这个啊，一定注意，别把无理由想的太好了。我问是不是包装都在也行客服发我个图片表情就没下文了，挺不爽的，只能给一星； 所以我最后只给个一星，一个是不爽客服以及京东对这种情况的解决方法，占40%，省下就是系统了，与魅族华为小米的体验和符合中国人的习惯方面确实有比较大的差距，这个占50%，还有10%是因为前天三星c5…	-1
刚买7天 降价300	-1
刚买一个星期就掉价了，并且送的东西比上周买时候多，太扯了	-1
刚买一个月就降价*，摄像头还有毛病。麻烦死了	-1
刚买三个月屏就花了，真正不如华为	-1
刚买不到一个月，手机返回键总是自动触发！而且弄不好！这么贵的手机，还有这样的问题真是不应该！！！	-1
刚买不到一个月就出现严重质量问题，去售后说需要换屏幕及摄像头，这种情况已经达到70%以上需要维修了，京东推卸责任，迟迟拿不出解决方案！太令人失望了，真怀疑是否是正品，我们会继续找媒体曝光。	-1
刚买不到一个月降价*，哎，坑死了，以后再也不会买三星得了	-1
刚买不到一星期就少降*，真够恶心的。	-1
刚买不到半个月的手机，怎么充电变这么长时间，质量怎么这么差，客服，回应说要么送京东检测，要么要7-15天才能有反馈，买个手机太麻烦了了吧！！！要求给一个合理，且及时的说法！！！！没快充就算了，这也太慢了吧！！！	-1
刚买两天降价超1000，分期不给保价，虽然货是正品，但是这样的态度真令人心寒，今天买的是黄金，明天变成土豆，是否营销过头了请问？什么都不送，早知道去猫买。	-1
刚买了3天 手机home键掉漆，我也是服了，客服请回复我谢谢	-1
刚买了一个月左右，屏幕就出现雪花，出现一条条的 然后卡机死机 现在一充电就死机。果然网上买的就不好	-1
刚买了一周就掉价800，气死我了	-1
刚买了两天就降了*块钱，这京东的价格原来也没谱啊，不会再来买了	-1
刚买几天充电线都起皮了，一看就是假东西，充电手机发烫，京东还能让相信不了，京东看到了联系我，分是给快递的	-1
刚买几天就降了*钱，*真黑，给赠品不值钱保价，破东西一点不稀罕。	-1
刚买半个月，手机屏幕一言不合就花屏，寄回售后说是露液，真是无耻，不说别的，这款产品不是防水的吗，难道跟空气接触也会进液？也没谁了	-1
刚买回来屏幕上就有黑点，三星是啥质量，怀疑是次品，在京东买四台手机，四台都要换的。	-1
刚买回来屏幕上边有圆形线不仔细看，是看不到的，估计是屏幕做过抗压实验的，一看就知道了，屏幕做过实验还给我送过来，这是什么意思？是第一批都这样吗？这是实验品！而且手机真不真我还不知道，还低看看，其他的还不错。系统5.1.1.运行内存我很满意！屏幕显示非常完美！系统非常流畅！机身也非常完美，比苹果6s强多了！突然觉得苹果不行了！虽然说苹果和三星各有各的好，但是我个人觉得最起码也要对得起消费者！而现在我个人觉得苹果在走，摩托罗拉和诺基亚的老路，从最高点慢慢变的不行！	-1
刚买完 就新的活动 真的是太不靠谱了	-1
刚买完 没多久 就送无线充电器。找商家也一直不理人。垃圾。	-1
刚买完就多送移动电源读卡器，心累	-1
刚买完就送600券，现在又降800，三星不愧跳水大王，差评！	-1
刚买完就降价，因为一些没用的赠品没办法价格保护。	-1
刚买完就降价，这心情跟吃了个苍蝇一样！买之前在旗舰店查了就是5288。相信京东，又有活动才在这儿买的。结果现在手机被妈妈带到国外玩去了，7天退换是不可能了。只能自认倒霉了！京东客服也是无语了&hellip; 翻来覆去就那么一套话！相信被恶心着的不止我一个人。再也不要在京东买手机了！能看见评价准备要买的亲们，一定注意！	-1
刚买完就降价。坑死了。820发热比较厉害	-1
刚买完就降价什么意思啊	-1
刚买完没几天就降价，和客服反应，死活不给解决，超过7天，5000多手机超过7天降价不给返？我就呵呵了。。。*再见	-1
刚买就降价，本以为京东值得信赖，没想到也是各种推脱，价保形同虚设。	-1
刚买就降价*，给不给退差价。。。。	-1
刚买就降价100，用了减100限品类券还不能保价，必须差评。这券又不是秒杀，懒得无理由退货了，这100就当喂狗了。	-1
刚买就降价240块，说了618保价，结果用优惠卷来坑人。失望了	-1
刚买就降价800，心好疼，我想静静	-1
刚买就降价了800，说实话，很不高兴	-1
刚买机器屏幕有瑕疵，然后找客服，没法换货。	-1
刚买来就来不了机了垃圾	-1
刚买来第3天喇叭听不清 挂了重新打的才正常 有10吧屏幕花屏了 又重启后才正常 不知道什么意思 现在有20天不出现那毛病了	-1
刚买来还没收货就降价了，有点坑爹，问你们也是给我打哈哈！算了，，，手机虽好价格坑爹	-1
刚买没几天，挂电话挂不断，点了挂断没反应，想退回也不行，只能重启，联系客服没人说话，这就是在网上买的坏处	-1
刚买没几天就降价了，什么鬼	-1
刚买的S6edge 刚过退货时间15天 就开始屏幕出现乱闪 过了一个月就开不了机了，拿到售后说是手机给root过，不给保修了，真是让人郁闷呀！花7000多买个残废，真是气人，更可气的是某某不给解决问题	-1
刚买的WIFI就连不上！换了一台手机信号不是很好！可能是新系统的问题，软硬件没成熟就发售实在不应该是三星的作为！希望这点多向IPHONE借鉴！不过一直很喜欢三星，还是会继续支持下去！	-1
刚买的三星s7edge，用了两个月不到主板就坏了，只能拿到维修店去重新换了块主板，两个月都没到啊，什么质量啊，卡着卡着就死机了，再也用不了，换完主板什么重要的资料都没了，坑人坑死了，绝对差评，都说京东卖的质量有保障，五千多的东西呐，没用多久说坏就坏，还不如买国产机	-1
刚买的就是坏的。说话对方听不见。	-1
刚买的手机当天晚上就坏了，不太明白，是直接给我的翻新货么，然后去三星维修点去修，人家竟然不认可电子发票，跟工作人员吵一架。在京东买这么多年东西竟然出现这种事，很伤心很不理解。	-1
刚买的手机还没半个月就频繁死机、手机用起来一会儿死机，	-1
刚买的照相时镜头上有个黑影，在镜头里面，机身很快就会发热，弄不好还会死机。退货换货慢死了，今后再也不会上京东买了。服务差，质量没有保证。	-1
刚买第二天就跌价，还跌800	-1
刚入手，由于本人大意没有验机，用了2小时发现屏幕花了，也不知是京东给我发了台烂货，还是我自己弄花的，就玩了几小时，一台S4一台S6放在口袋里，绝对没有其它硬物碰撞到手机，要么就是指甲弄花的。反正现在是没人认帐也不保修说是人为弄花的，买的过程中一路坎坷，先是系统崩溃了预定的白条用不了，害我第二天退了重新买又发现要的颜没色有货了，用了白条又发现给坑了，白条点击购买时都显示不收利息的，买完后又说要720元的利息，最差的一次购物体验，发誓再也不会来京东买东西了。	-1
刚几天就降了*，难道我们的钱是大风刮得吗，对京东彻底失望了	-1
刚出来的时候就买了，反倒什么东西都没送，现在买送的东西都好多，这都不是重点，重点是，这手机总是跳分屏，自己不断的往出切换，好烦，屏幕很是不好用，好看而已了，摆设。	-1
刚刚买了几天就降了100块，不爽，机器卡顿厉害，发热厉害，还有不配专用快充，这充电慢的吓人！	-1
刚刚买就降价 没谁了	-1
刚刚使用两个月回来评价，我用的两张卡，手机摔了一下卡1永远在关机状态，卡2正常使用。正在找京东沟通返修的问题，京东售后说返修至少要31天，如果嫌时间长的话就自己拿去修，哎！	-1
刚刚到 耳机是坏的！	-1
刚刚拿到手里就不行，屏幕下面还缺了一块，很生气，再也不愿意去京东买东西了！服务起来沟通太麻烦！	-1
刚刚死机了一次，昨天下午到货的。如果再死只好退货了	-1
刚到不久就这样多评价了，真是为了话费去的？？？靠不是吧	-1
刚到手，手机端降价*电脑，手机不在一个端口，京东拒绝保价，购物很失败	-1
刚到手就降价四百，还通过送垃圾赠品不让价格保护，京东所谓的买贵退差价都是假的	-1
刚到手确实好看，颜值逆天，代价就是屏幕太脆弱，才买十天，没磕没碰屏幕左下角就裂开了，不影响使用，但是看着真膈应啊，售后不能给换，说要检测报告，但是玻璃怎么出检测报告，修要自己出1500，如果不是曲屏真爱就买直板吧，买这个一定要带碎屏险	-1
刚好用一个月，屏幕一侧发黄，发热花屏，直接无法使用了，已经申请售后	-1
刚拆封就发现一个磕碰，很是诡异，申请换货中。	-1
刚拆开的新机，右下角内屏幕就有一个黑点，质量问题都不过关？为何还售价这么高？已申请退换货，无语啊O__O&quot;&hellip;	-1
刚拿到手，还没用，关机情况下机子非常热，像要爆炸了一样，包装也不好，肯定是别人退过的手机	-1
刚拿到手就看见屏幕漏液直接申请换货了，官方说7到15天送到厂家检测，呵呵了，希望换的货别再是问题机就行了！	-1
刚拿到手是满意的，这才多长时间，拍的照片都打不开，1月21号买的手机，编号11911098613，质量也太差了吧，5千多的东西	-1
刚拿到手机竟然是坏的，而且退还周期还那么久，等你们换个手机还得半个月？	-1
刚拿到机子 一开机手机屏幕就有黑点 机身发热 现在京东的东西 质量越来越差劲	-1
刚收到，包装破损，手机卡2信号时有时无，检测为手机原因，充电发烫。	-1
刚收到的 后置摄像头居然坏的 拍出这样的照片 正在换货。。。。。。	-1
刚收到货两天降了800元	-1
刚用一个月就出现花屏然后就黑了；京东客服就是垃圾，就会抱歉抱歉，直截了当的说手机太贵了不能给您换，哈哈！着急出差手机里的文件没法弄出来还想说用50块钱的京豆打发了事，真是哔了gou了，京东真是呵呵了	-1
刚用了不到两天，内存就一半多了，	-1
刚用了俩月侧键按不动了，想退货，信号还超差！最失败的一次购物了，千万不要买这款手机，太坑了	-1
刚用几天音量键就按不动了	-1
刚用半个月 手机恢复出厂设置后登录三星帐号激活手机一直显示处理失败 拿到售后中心只能返厂换主板。。。差差差	-1
刚用手机屏幕左边出现一条竖紫线，质量太差了。	-1
刚用还不到一个月，手机侧按键就坏了，不能自己弹起	-1
刚购买赠品就变了	-1
刚过7天，有本事继续降价！	-1
刚过了一天，就开始送无线充电器，这不坑DIE吗？看来京东果然是坑东	-1
刚送来的哦！就是刚才，一开机就有黑点，因为不影响使用就懒得换，5600就这样！看透了	-1
刚递交订单就降价八百，京东你是玩我呢？申请价格保护好费劲，服务太差&hellip;	-1
别买这手机，我六千多买的，十多天开始手机信号每五分钟就断，电话和上网都不能，要求换机器，说不给换，告诉我去修，要一个月，我一个月用什么，你告诉我。	-1
别的不说,欺骗消费者，我只能给一颗星	-1
到手4天屏幕就出现问题，一根绿色的竖线好烦，今天发回去换货。把充电宝搞丢了，不然就退货了，这质量也是没谁了....	-1
到手后很新鲜 但是麻痹2小时候指纹解锁就不管用了 不管我怎么按 怎么洗手就是无法识别 最后没办法只能退货 关键是我的通讯录什么都已经在里面 别说什么备用密码 都一起失灵了额	-1
到手就降100 还不支持价格保护	-1
到手才4天，今天下午手机就开始发烫了，耗电量明显比前几天快，什么鬼？	-1
到目前为止，唯一一次差评。为什么不能用优惠券？意外险根本没有看到，摔碎怎么办！！！	-1
到目前为止用的最糟糕的一款手机了，刚开始用正常使用下出现黑屏，按哪个键都不管用，过一二十分钟可自行恢复，本以为是偶发状况，不想接下来的时间隔三差五出现黑屏的事，而且总出现触屏不敏感，手指点击后无任何反应，糟糕到家了。 联系京东客服要求退货，因超过7天时间，京东不予办理，问题无人协助解决 上面都是自己真实用后感受，好歹也是大几千块钱的高档手机了，用着实在心塞，大家小心了	-1
到货时间慢，还不是原封包装，发票还不是开一起，垃圾。	-1
前一天和客服通话说不能退换，但现在我仍要求退换，购买后1个月手机出现各种问题，如WIFI无法连接，无法正常通话，无法正常使用应用，反复死机等问题，在当地三星售后维修的检测结果是主板损坏【非人为问题】。一次在京东十分不愉快的购物，虽已过退换期限，但在京东购买商品的品质没有保证的程度，让我仍坚持要求退换！！！！请尽快解决！	-1
前天买的5288 今天就变成4988 京东你这是要闹哪样 不过手机真心酷	-1
前所未有的失望，京东购物旅程也就到此结束。我买回来放了半个月没用，因为也比较忙。等我用的时候，手机外音喇叭是坏的。新手机买回来一次没用就这样，京东卖的什么垃圾产品？现在退回去，也不给我换，给我退回厂里修了，我已经等了十几天了还没修好。我不想再说什么了	-1
前摄像头里有个纤维灰尘，对不起三防的功能，比较不满 意	-1
前置摄像头是歪的。	-1
前置摄像头歪了，而且京东没有盖销售章，不能去三星官方售后，根水货机没啥区别！	-1
劝大家别买，用了2个月问题就来了，屏幕闪光黑屏论坛看到好多都有这个问题，去售后保修几个维修人员拿抹布擦了又擦终于找到一处划痕说不与保修，本人不喜欢戴套有摩擦是肯定的，但是你们质量有问题管划痕什么事。三星现在真的很垃圾各种问题。	-1
动不动就死机重启是什么鬼，待机或者打开应用动不动就关机重启	-1
包装不想多说，装在飞科的盒子里面零零散散，没有任何填充物，摇一摇感觉像是在摇爆米花。不知道用这样的包装怎么放心手机不会摔坏的，打开之后，发现塑封工艺很牛，看起来像是全新未拆封新机，重点是&ldquo;看起来&rdquo;，打开之后，手机屏幕自带的膜脏的已经彻底无语，要模仿新机，至少换个贴膜啊，用了一段时间，手机发热什么的通病也就不想说了，质量什么的，三星，你懂的，用个颜值而已，凑合用了。重点是在京东上买东西，麻烦不要再把旧的东西当新的再卖出去，谁买东西希望是别人的退换货。我买东西不是特别严重的质量问题都就凑合用了，但是别人的退换货什么的，别再给我了行吗？（拍了开箱视频，说我造谣就来辩）	-1
包装就不谈了 我看别人买都是红盒子包装好的 我到手的时候是一个纸箱 纸箱还贴着大大的小米2个字 这些就不谈了 我买了S7edge 本该赠送我5样礼品 《手环 内存卡 充电宝》 其中一个没发给我 我就联系客服 第一遍联系客服让我等短信告知 结果 第二天联系客服 所有问题重复一遍 得到的答案还是让我等短信告知 第三天我又把问题都说了一遍 还是让我等短信告知！ 我真服了。京东的售后和采销部门是有多忙 一直要核实这个核实那个？ 要不是必须最低标准打一颗心 我连1颗心都不想给！ 天天让我等短信告知 我都烦了 不牢你们这些部门工作人员大驾了 赠送的东西我不要了~我等怕了~~~ 后者没买的 你们请慎重~~~！！	-1
包装差，连个气袋也没有，也没有大礼盒	-1
包装很差，没有赠品，功能也没有像介绍的那样，将就着用吧	-1
包装真的很差，外包装是个手机盒子两倍大的纸盒，连个充气袋都不放，配送员送货态度真的很不错，饶了路给送到单位。赠品也没有	-1
包装破损	-1
十月底买的机子。两个月屏幕左侧从上到下一侧已经没有反应 ，跟半砖头没有区别。这就是大厂素质？不只是京东还是三星了，花钱买的就是闹心，找一个稳定的机子什么时候成了奢侈的事情了。	-1
千万不要买，买了就后悔	-1
千万不要买，机子发烫的要死，卡顿严重，各种软件闪退，照相机都能闪退，麻痹的假货来的，发票一直没补发，客服直接不理人，劳资准备打电话去315.烦人	-1
千万不要再京东买手机 我买了两部三星S6手机 到手第二天出现重启和自动关机现象，后报修竟然只有个信息回复说去检测中心检测，出具检测单上传京东才能进行返修，完全无视7天包退15包换的服务概念，千万不要买 千万不要买千万不要在京东买 千万不要再京东买 搞得我已经出了15天包换的时间	-1
千万不要在京东买手机了，一年时间在京东买了2台三星手机，第一台s5，2014年9月购买，收到后就发现信号不稳定，7天内更换了一台，后来发现还是这样，结果用到今年4月就发现有一张卡没有信号，去了售后检查说主板坏了，结果更换主板，那个过程叫一个折腾，手机清资料就弄了3次，导致还有软件不能复原，那个气愤，当时以为是手机可能就是有问题碰巧了吧，出于对京东的信任，于是2015年6月就又在京东买了个s6,购买过程那个曲折那个被京东的忽悠和欺骗，送货时刚好本人休假，直到6月底才回，手机是京东送货员送到公司前台的，拿到手的随机赠送的礼品竟然是拆过包装的，觉得反正是赠品没关系了，用了几天时间，竟然发现相机拍照是屏幕上有个黑色的色块，去售后一检查说是摄像头坏了，需更换摄像头，新机怎么回这样？于是找京东问要求更换机，京东竟然说已经过了更换期，不能更换，怎么过了更换期，手机到我手他也不过10天，该死的京东说不以…	-1
千万别信卖家的话，他们承诺第二天发货，我催他们发货就找各种理由搪塞，12号买的，15号才发货，这种卖家根本不应该在天猫存在，天猫没有差评，所以他们不在乎信用&hellip;	-1
千万别在京东买！手机售后服务简直没用，保修12个月15天内包换就是放屁。我18号买的手机，19号到货，关机键有摔痕凹进去，当时没有在意，没有申请退货，到26号时手机关机键就失灵了，我申请换货，手机29号到售后人员手里，告诉我换货不行，维修要另加1500元，我没同意，最后原件返回。	-1
千万别用三星的电话，我买了几个月就信号开始不好，拿到售后卵用没有，整天死机，整天卡，1500卖给别人了，qian?wan?bie?mag	-1
半个月不到吧，摄像头保护玻璃掉了，边缘就是胶水印，打电话给售后，售后说不在保修范围，问玻璃没粘住不算质量问题？售后说他们有检验合格证，这个掉了不是质量问题。	-1
半个月不到降价800块。这速度，也是醉了。还不如买个苹果，保值一点。	-1
半个月降价一千，你赢了。	-1
卖完就跌了800 真的	-1
卖家售后服务真的太差了，买了12天手机就出现质量问题，三星售后服务店出了检测单，售后人员还磨磨唧唧的不给发货，又周六不发货周日不发货的，买的时候怎么没这么多事呢？	-1
卖的太贵啊	-1
卡托是塑料的太软放卡后推进去很费尽，推劲大了塑料卡托就要断了，手机太轻了里面是不是塑料的不知道，手机还没用手机自带软件就占了67％，用了几分钟手机就很热了，快伍仟元的手机还没有壹仟元手机好，感觉上当了，再也不会在京东买了，在京东买衣服和鞋邮来的都和订单不一样的质量差的，买手机还是水货，京东允许这些不讲信誉的商家为非作歹早晚得等着关门吧	-1
卡槽位置鼓起来，贴膜下有灰尘，充电口卡槽有摩擦过的伤痕，说明书纸盒有皱痕，难以接受。	-1
卡死了再也不用三星了再见	-1
卡顿现象严重，外观不错。但不是土豪的话真心建议不买，用不了多久肯定坏，根据用了一天的经验来说	-1
卧槽 刚下单 就降价4988 好心疼 如果不是用白条买！我早退了！！买第二部了 ！到这逼不得已还是给了差评！	-1
卧槽，用了两个月就黑屏开不开机了，正常放在桌子上，自己黑屏，这么高级的手机第一次见	-1
原先买了部全网通，全是问题，退了，说多了都是泪。发现京东和三星都有问题，是不是我人品不好，又入手这部机子，1，续航不好，2，看视频发热严重，非常烫，非常烫，非常烫，3，通话时常没声音，4，玩qq斗地主，每次都出现死机，5，浏览网页，来微信，小窗口打字看不到字，语音听不到声音。同样，来电话经常听不到声音6，用一天后，卡顿。下面说京东的问题，原先的全网通，入手没两天，价格不变，突然送很多礼品，我的是裸机。这部机子，从618活动开始，等了很多天，抢了很多劵，当时都用不了，着急用手机，6月8号入手，结果618了，能用劵减130，搞什么飞机。4k，很多钱了，可以买个大件了。顺便说句题外话，京东秒抢活动，我遇到的都是提交订单ok，付款的时候恢复原价或者支付不了，耽误好多时间，泡后活动结束。至于手机其他问题，还在使用中。看后续情况吧，要入手的基友，三思。	-1
原本买了挺开心的，但是这次却是在京东上特别不开心的一次购物，下午买的，晚上就直减6*因为有白条，却有无法申请价保。	-1
原装盒两层包装膜令我震惊，至今在*第一次买商品里面没有发票也是牛逼，开机内存占用80%还都是系统组件程序堪称经典，动不动闪退，迟钝如狗让我不得不觉得隔壁IOS是辣鸡，根本无法和edge抗衡，总的来说，这手机真是好。	-1
去nm逼的 说好的白条分期 **的给我搞成一期 没钱就别别来这套 手机一看视频发热就很厉害 还是苹果好	-1
去年买了个表，买来第二天就后盖屏幕碎了，请想买的考虑清楚	-1
又是降价，又是600劵，果然便宜没好货，屏幕缝隙那么大，新手机边框到处都是小划痕，这么多钱的手机送过来居然是个破塑料袋装着的，果不其然，赠品都是拆开的，这倒是无所谓，你他喵的手机也是二手的，二手东绝非浪得虚名。	-1
又替京东消灭了一件二手货	-1
又降价，刚买两个星期就降价，玩我呢是吧？	-1
友谊的小船说翻就翻，京东你玩文字游戏啊！说好的保护壳，冲电板呢？还赠完为止，还不如不写赠品呢！谁在乎仨瓜俩枣，但事情不喜。给一星还是看面子，京东得改啊！！	-1
双11买的，特地用了一段时间再评价，结果11月30号就出问题了，返回键失灵，连续按返回键就变成了左边的最小化功能，太令人失望了！给京东客服打电话，表示过了15天就不能退换货，只能返修，极度郁闷！15天没出问题，刚过就出问题，这是你们控制好的节奏么？而且预约好的时间也没来取手机返修，作为一名金牌京东会员，那么相信京东，这次的体验太差了！	-1
双十一买双十二坏，维修站说是京东买的找京东去，无语了。	-1
双十一订的，16号才送到，右上角缝隙非常大，左上角和左边翘屏，三星的工艺质量连山寨都不如了麽？三星以后估计是自己作死自己了。另外还有小标签已经被拆封，5月份生产的机，翻新机？已申请退货，看看后续情况！	-1
双卡双待 只有两个卡槽 放两张卡，SD卡就没有位置了 上当了 不方便	-1
双曲面屏膜呢？ 连接wifi老是断网。	-1
反应慢，有时点好几次才能出来，真心说不如原来用的小米好用呢	-1
反应没有想像中的好，速度一般，大家买的一定要注意，使用双卡就不能使用内存卡，后悔，我就是应该华为的这样换机，结果还是这样，我一直用N4没这问题，结果一粗心没去注意。	-1
发布那天下的单，才几天屏幕就有几道刮痕，很难看	-1
发烧严重，我还以为买到小米了	-1
发烫严重不说，连发票都没有	-1
发烫厉害?	-1
发烫很厉害！！！！！	-1
发热	-1
发热严重，不保值，买的时候五千六百，现在四千八百，草，，，你，，，妈咪	-1
发热严重，反应迟钝，买完发现没实体店便宜，包膜也得自己出去弄，贵，不值，破，后悔	-1
发热严重，掉电极快，还没我用了一年半多的iPhone6 的电池管用	-1
发热严重，用电超快，太差劲了	-1
发热严重，相机不是那么强悍。在南昌购得为难毛要从武汉发货？说的是次日送达结果等了好几天。什么狗屁韵达快递简单的包装箱里面连个保护措施都没有，拿到货时包装箱都被挤扁	-1
发热太厉害了，除非什么都不干，否则发热是一浪接一浪，烫手啊！	-1
发热情太严重啦，快充和非快充没啥两样。。屏幕太脆。第一天屏幕就碎了。不知道什么原因。	-1
发热非常严重 到手两天时间 充电时发热严重 系统更新发热严重也就忍了 就连打开普通应用时间稍微一长都很烫 并且发热时电掉的飞起	-1
发现重大BUG，在超市使用支付包（三声）付款后，移动网就会断开连接，虽然4G信号显示满格，但是无法上网，wifi正常。 必须重启才能再上网。 为了验证，昨晚支付包（三声）付款后目前已经15小时没有重启，4G网无法连接，只能用wifi上网，大家可以试试。	-1
发票一直没有给我	-1
发票了？	-1
发票到现在还没开好，都几个月啦	-1
发票呢	-1
发票呢，几个月了？？哎	-1
发票呢？无线充电呢？手表呢	-1
发票呢发票呢为什么没发票？	-1
发票抬头开错了知道吗？是公司不是个人	-1
发票是假的。根本查不上。朋友们别我们掏了税却给我们一张假票，。国家正规发票无论你在哪里都可以查上，但是他们家的发票竟然查不上，还说要到港物处查询，有图有真相，自己看吧，他们家总是这样支支吾吾，他们说是真的就是真的。	-1
发票没开，各种问题不断，home键掉漆，跳屏，自动按返回键，屏幕缝隙比门缝都宽。微信等等软件体验垃圾，超级坑，第一次买三星也是最后一次。超级后悔，从此远离棒子和安卓	-1
发票的时间太慢，4/18号买的要到5/10才能可能拿到！！！！	-1
发票选择没有提示，一直默认纸质发票，变成了电子发票	-1
发货太慢，这个属于不是预售吗	-1
发货延期就算了，充电器居然不是原厂的，不是我诽谤，我用原厂的对比了。上面的印刷相比原厂都很不清晰	-1
发货速度太慢，手机没怎么用，就听个歌，都发烫得厉害，而且掉电比较厉害	-1
发货速度太慢了，让人受不了	-1
发货速度很慢。	-1
发货速度慢，19号下单29号才收到，没礼盒。差评，一星是给手机的	-1
发货速度慢，一直在采购，好不容易等到了，结果还是残品，期待的心情全被搞坏了，群友集体京东差评不解释。	-1
发过来盒子小小的，一打开吓一跳，他么的是360F4的包装外盒，幸好打开里面还是三星，吓死宝宝了，性能不错，有种用苹果的感觉，f但是发热严重，一言不合就发热，模样普通至极，根本配不上我的高颜值。还有就是抠门，啥东西都没得送。想来想去，还是不爽，，外观太不行了，严重影响我校草颜值，哎不说了，赶紧吃几个鸡蛋补补，乡下人营养不良，看一次片，鸡蛋就白吃了，哎眼前黑了。。。	-1
发过火纪检部VCD发发哈	-1
只对外形好和拍照满意，吹的充电一小时，黑边，运行内存吹的4g实际3.3，组装软件一堆还卸不掉，后台应用太多清理不了，可用内存不到1g，应用安装太慢，已经恢复出厂设置3次，有些应用还是无法运行，主题下不了，是买到假货了还是手机不行，太对不起5688的价格，广告是不能信了	-1
只有打零分了 ，手机买回来用了没三天，今早直接死机了，重启都重启不了，只显示一个夜钟侧面屏，直接影响我正常工作使用，还要等他们工作人员上班了才能处理，好多客户电话要处理，急死我了	-1
只用了六天就掉漆了，竟然三包不保外观，没得退换货，差差	-1
只能是差评，把我的赠品给换掉了，太不守信	-1
只能说&hellip;烂的一比啊！	-1
只能说京东客服太坑了，没有**好。这样一看，**比京东成功有理由的，起码，服务负责。而且京东活动过了，价格反而更低，一天内三个价格，真随意。	-1
只能说后悔了，手机看着还是不错的，不过居然兼容上网卡有问题我也醉了，还不如一两千的国产机，曲面屏除了装逼没卵用	-1
可以说这是买到最后悔的一部手机了，屏幕太小了，看着低档的不行，新拆机开机启动软件里面竟然自带美团软件，然后就拿着再自己下了个酷跑，竟然强退，问客服竟然说我下载途径不对，我也是按照客服说的在移动商城下载的，发热严重的不行了，什么快充功能根本就跟普通充一样的速度好吗，原以为乐视是水军捧上去的吃亏了，买了这手机才知道什么叫上当。那些棒子喷子水军离我远点&hellip;&hellip;	-1
可惜就是没有发票公司不给做账报销不了，只能退掉、还得去商场买	-1
史上最垃圾的购物网站京东。物品三星不用质疑。但京东太垃圾。试问。我下单后10分钟内。去电只是只是想改一下收货地址。（由于工作关系，工作地点与家庭地址有60公里距离。下单后才想起第2天是周末休息，货品比较贵重还是邮寄至家，可以立刻查看。仅此而已）有何不可？京东竟然说下单后无法更改。去吃个饭没上菜，没下锅都可以改的。买部将近*钱的手机竟然说不可以？这世界上除了京东还有那个网站是不可以的？这不是霸王条款是什么？京东还有什么期待？	-1
右上角屏幕松动！！ 有划痕！	-1
右下角完美。。已经申请退换，不知道*能否给力	-1
右下角屏幕下陷，这可是五千多的东西啊。其他都好照相完爆果六	-1
右下角的凹陷真的好明显 而且封口贴纸是两层 内层标签是铂光金 外层标签是雪晶白 怀疑是退货后重新封装 这次京东让我失望了	-1
右侧有2和细微的刮痕，其它的暂时没发现问题。	-1
右边侧屏很出白线，第一次购买京东自营商品。三星旗舰店的手机没有这条难看的白线，刚出来曲面屏手机品控太差了，我刚好评里有很多人手机都有，大家要去三星售后去修吧，时间久了，修起来就麻烦啦！有右侧曲面有条白线的朋友赶紧去修手机吧。	-1
同时使用移动和联通卡时候，联通的不能用4g3g，只能作为副卡，不能切换，京东隐瞒没有说明，还有不能关闭4g，在申请退货，打算换全网通的	-1
后台程序太多太占内存了80%多相机有时候自己打开不值这么多钱太亏了	-1
后悔了，垃圾系统，曲面屏操作不方便	-1
后悔了，带电差的一逼，还老是卡机，劝大家别买。	-1
后盖左上角磨损，质量果然一半	-1
吐槽下JD配货和物流 我下单是周二凌晨1点，当时说11点送到。下午也没送到，查看发现订单变成预定了，需2-6天。联系第一个客服，答，你要等不了，就取消订单吧。牛！好，我等。两天后，问第二客服为啥会变成预定？说，因为货翘，多个人同时下单。凌晨一点，多人和我抢？好吧，再等。 又问了第三个客服，答，调货需要7天。为啥会从2到6天长到7天？问可以换个能送的颜色么？。答曰只能取消订单。我问取消多久返款？答曰，15天？！我说我不满意！就给我转了专员。第二天，专员打电话，让再等等。等多久啊？答曰联系了采购部门但具体不知道。问，为啥JD网站至今还显示北京现货呢？答曰，有但货少。货少，为嘛就要把我的单变成预定呢？答曰，有人抢...不好意思...。终于，周五晚上收到出货通知！一查，发现周六送到我公司。我住朝阳，工作在海淀，原本周二以为可以送到公司，现在拖到了周末。问客服，可否改配送到朝阳，答曰不可以，可以联…	-1
吐槽下三星手机的脑残设计，我习惯单手用手机，左手。三星的返回键设计在右面，所有应用都要双手操作，麻烦至极! 设置成左手习惯也解决不了,因为返回键是固定的。这是歧视左手用户吗，还是用三星手机要有十厘米长的拇指？	-1
吗的 手机边框把我手划了 乎乎流血 气的我当场砸了	-1
告诉我！开机的时候为什么辅助功能开着？盲人模式？在引导界面我足足快耍了将近一个小时！还有，发票呢？发票在哪里？	-1
呢吗垃圾机	-1
呵呵，刚买没几天就多送了手机，变相降价	-1
呵呵，打开手机玩了没几分钟，发现屏幕上有特么一个绿点，我说的屏幕中间，劝你们还是去实体店买吧	-1
呵呵，真烂！有点卡！安卓的问题！果真第一批机不能买！！关键呵呵的是，京东超级无耻啊！赠品变了就算了，SD卡居然是坏的？害得我试了好几个手机！果断差评！	-1
呵呵呵，刚买一个星期就降价*块，真的很恼火	-1
呵呵呵呵呵呵呵呵呵呵呵呵呵	-1
和同事在一起玩王者荣耀，同样的地点，同样的网络，同样的游戏配置，他2000多的vivoX6不卡，我4888的三星s7却总是卡！！	-1
和苹果6相比 不建议买S6	-1
咱京东店大货多，快递就这吊样，您爱要不要，爱买不买，您嫌快递破您就别家买去，千万别来我家，谢了您嘞！	-1
哇塞，以后三星的东西一定不要买了～不到一个月降价*&hellip;&hellip;我应该说点儿什么呢？其次，买手机的时候说有*返券，只知道现在没有看到&hellip;京东你的节操呢？	-1
哈哈哈哈哈哈哈哈哈哈	-1
哎 手机很喜欢 但是有瑕疵 想退已经过时间了 最好还是实体店买吧 在京东买咯很多电子 不行啊 右上角屏幕有2个黑点 大概直径1cm准备去修	-1
哎，才用15天，屏就睡了，睡了啊！！！放在车上一个急刹就睡了，我也是醉了	-1
哎，没想象中那么漂亮。感觉和以前的S5一个模样	-1
哎后台程序N多草这么给关了啊3个G的每天都有2个G已使用我都没开什么啊	-1
哎呦！不错哦！不过我的钢化玻璃顶部有个熬下去的缺陷，其他软件运行和开机速度，效果都很好。只要不影响操作我也是懒得换了。我也是700以内的用户呢，居然发一个顶部钢化玻璃凹陷的给我，我都交代客服要质量好的和包装严密点，你们令我太失望了。以后绝对不会到你们店铺买手机，宁愿在官网买。以上说的不好请谅解，但事实你们给了这样的手机我。	-1
哪位老板得到了蝙蝠侠战车 发图看看呗	-1
唉，京东真让人无语，买了不到一星期就降价，天天宣传白条，结果用了白条之后还不享受价格保护，我已经醉了	-1
唉，刚买几天就掉价600心灰意冷呀还不给返现，还不到半个月这让老用户情何以堪	-1
唉，又吃一次教训！这绝对是我最后一次教训！绝对再不买三星的产品！这次看这曲面屏涉及实在吸引人就买了，用了没几天，手机从大约40厘米高的地方摔到地上，竟然就给碎了！太脆了吧！用料是有多薄啊！家里三星洗衣机也已经淘汰，绝对不会再用三星的产品！	-1
唉，本来是送人的，给别人惊喜，谁知道京东一发货就把信息发给收礼人了，花了七千的浪漫被你毁了	-1
唉，还不如s6，	-1
唉，这价格怎么又掉了！618活动不如不搞呢，京东这样搞真没意思！！！！强烈要求补差价！！！！！！！！！！！！！！！！	-1
售后......，让人无语！	-1
售后客服态度不好 不停挂断我的线	-1
售后服务根本就没有 发信息给客服都不回 真让人生气！京东是骗子吗？手机经常卡机 没反应 总是死机！做工也很差，以前苹果的漆都是电镀的牢固度很好，不会这么容易就摔掉磕掉，这种手机简直就是垃圾！新买没多久就已经磕的不成样子！最可气的就是售后，因为订单已经超时确认收货了，售后根本不鸟你！而且为什么别的顾客就送无线充 我的就没有！垃圾垃圾垃圾！	-1
售后服务非常不满意，提问几天没回复。	-1
售后真的是无语 没什么可说了 说好的补偿也没有 电话里说得赔偿硬是不承认	-1
售后简直就是一坨屎，死心眼	-1
商品不怎么样。没有红米2流畅，系统不及小米一半，屏幕不及魅MX4一半，做工不及苹果一半，后盖玻璃下方两个角明显下陷，最大败笔是摄像头外凸太高，该凹的不凹，不该凹的却凹了。优点是全网通双卡（其实魅蓝2和努比亚也有），照相很好。	-1
商品出现问题	-1
商品收到。但是快递花了三天时间才到，差评。 发票是那种超市类小票。拍下后，随机赠送的东西改变了（多了300券），和客服沟通，必须按照拍下时原来的赠品来，就差一两天呢，差评，闹心。	-1
商品是人家三星的就不用评了。三星手机S6 edge+,赠品包含三件，1无线充电器2移动电源3手机保护壳（至今页面上仍有）。我的订单15日下单，手机卡不说耗电量特别大，说好下单赠送保护壳，中间咨询了几次，都毫无结果，只能耐心等待。赠品一共3件，收到两件。另外赠品不知所终。如此岂不是欺诈加无赖？承诺要算数，京东作为大型电商企业，内容虚假，完全与你们的地位不相匹配。顾客买你*的商品，你们却为了*的赠品使诈？靠这个能发大财？古人云大浪淘沙，一年不管大件小件都在你家买 是因为比较信赖京东，太失望，本人绝不是故意差评，只是就事论事。	-1
商家给个合理的解释，什么都不想说了，屏破的，机子弯区，还开不了机！呵呵	-1
商标有破损，这一点很不满意	-1
啊啊	-1
啊想说的劣质手机，瑕疵手机换货还是瑕疵手机，下次绝对不会买京东数码产品	-1
啊还是你喜欢的时候我什么啊还是你喜欢的时候我什么	-1
啥东西啊，随便运行任何程序，用不了多久，就会烫的吓人，还不是背面，是屏幕！！！而且经常误操作，不是因为你按的不准，是安卓系统优化有问题，耗电很快，这么烫，没法不快！样子倒是不错，三星支付也挺好，可是这么烫，，，这是4000的玩意吗，，，	-1
啥玩意呀买倆月不到，降800	-1
喇叭声音开大了就破音，通话音量小，手机发烫，京东最差的一次购物	-1
喜欢ios别换了，三星这系统真的跟ios差远了！唯一优点就是好看，最重要**买了2天直降300有赠品还不能保价!第一个差评	-1
嗯 美得不要不要的 无法用语言表达 不过谁能解释一下 刚 回来的时候 USB口被插过得的是什么鬼？手机一点电都没有又是什么鬼？	-1
四月三号拍的机器，五号货还没到，再一看又加送了无线充电器，询问客服，各种时间各种不在，过n天才回复说当时什么清单就送什么，真的挺失望的，一直感觉京东的服务人性化，本想退了再拍，太麻烦了，姑且收获了，这一刻星给的是手机，机器还是不错的	-1
回来10天 死机8次	-1
回来一个星期耳机插孔就坏了，难怪卖不过苹果	-1
因为买的太心急，所以没去比较，买了才知道亏了！价格是一样的，但是*的赠品更多更实用，和京东的相比简直豪华太多了！而且虽然京东有分期购，但是额度根本不够，没法分期。诶，反正亏大法了！	-1
因为出厂日期的关系，送给朋友，朋友不是很喜欢	-1
因为看好屏幕才买.用了一周转手	-1
国庆期间s6跳水*手机外观不错性能不错 但是大家有没有发现呢 便宜的基本都是456月的库存机 手机真的一颗星都不想给*的手机屏幕居然翘起 三星s6的首批做工真不敢认可 大家应该小心留意456月份机器 翘屏缝隙大简直比比皆是 电商里京东的七天无理由确实是比其他的电商更有诱惑力但是往往有些人拿到的机器是别人翻返回去的二手机 奉劝各位机友如果不喜欢就马上退别在手里把玩七天然后退掉还大义凛然的说京东卖二手 可一部分也是处在大家之手 再者京东快递真的一分不想给 我家在长春高新区我1号订的s6 显示下午送到下午看物流信息显示中午就到达永新站点了在分配配送员 一直到三点打电话问什么时候可以派送快递元说分拣错误今天送不了 长春永新站这帮吃闲饭的 家里的地址买两次东西都是打车取的 中午以后就不送了 死活当天不给送 然后还说我们这片不归他们管 真的太差劲了 这种事不是第一次发生了 越说越生气 京东一定要做好…	-1
在二手京东买二手手机	-1
在京东买了很多个手机了，每次都买意外险，这次中奖了，屏坏了，没想到还要寄到深圳去，400电话也不好打，N天过去了，我的手机还是没有回来，有手机的人，心情你们懂的，差评	-1
在京东买就是因为速度快，结果慢的像牛！失望！	-1
在京东买手机买不到好的 这个手机有通病 屏幕水印 白屏太阳光下有水印 差评！！	-1
在京东买过两次手机，唯有这一次是要售后服务的，买来之后,home键右侧无反应，屏幕有一道刮痕，开机之后是根本看不见的，在昏暗灯光下也看不见，在外面阳光下就能明显看到了。好了，说下售后，我申请了售后之后，返给售后中心检测机子，说有刮痕退回来，好，退回来没关系，我申请维修可以了吧，结果呢，那个返修退换货的进度给我卡在了上门取件中，真是可笑，我都送过去拿回来了，这个流程早就完成了，我给客服打过电话，说会帮我看，在线客服这些什么的都说会帮我处理，结果两个星期动都没动，手机除了点小瑕疵还真的挺好的，这个差评只针对售后，比某猫售后还垃圾。	-1
在京东买过两款手机，都是三星的。第一款用了一年半屏幕就坏了，*块钱的手机就废了。这是第二款，信号接收能力太差，几乎每天都有打电话别人听不到我说话的情况发生，真耽误事。以前用的移动送的那种联想的手机都比这个强。 到底是三星的机子太垃圾还是京东用次品骗人。 花这么多钱，质量都这么垃圾。	-1
在京东买过最差的一次手机，对于他们的处理方式以及处理进度我表示很愤怒。机子买来第三天发现前置摄像头拍照是黑色的，录制超过一分钟的视频无法播放，发现问题后我联系了京东发货回去检测维修，第一次发回去维修没过两天京东客服来电说手机已经检测好了没问题了。这就给我发货回来。等我收到货的时候拆开检查并测试机器，发现所有的问题根本就没解决还是一样。这让人太愤怒了，你们卖给我们的手机是不是翻新机或者问题机我已经很生气了，还让你们这样的忽悠，没维修好的手机告诉我维修好了。你们平常夸大其词虚吹自己得专业呢？就是忽悠客户专业吗？结果又第二次申请售后，京东快递小哥吐露了一个消息给我，他自己在京东买的苹果6s不到几个月蓝屏了，还有我附近一条街一个客户买得三星s7手机跟我一样的问题也在申请售后。听到这个消息我更清楚自己该怎么做了。第二次售后客服来电说要发回厂家检测，我也答应了，结果第二天告诉我厂家检测手机已经获得最…	-1
在京东买那么多东西，第一次给差评，下单时明明有赠品，发货时没有收到，书面咨询客服客服一直胡搅蛮缠说没有，我给他发当时下单时的截图，截图上明显有赠品，他还说没有，他发给我的截图非常模糊，但是能隐隐约约看到有赠品，他就是说没有 。最后又电话联系客服，说安排补发，到现在还没有音讯。京东现在越来越会欺骗顾客啦！我是钻石客户，对钻石客户就这样服务，不知道对一般客户会怎么样！	-1
在京东最不满意的一次购物体验，收派员黑我内存卡，最后我威胁要退货才补给我，好在机子没啥事，京东管理有待加强	-1
在京东最糟糕的一次购物，看了那么多好评，选择S7G9350，刚用两天就出现系统卡，到第七天出现死机卡的特别厉害，有两处轻微划痕，京东只能修不退货，返修一周，客服说重新做了系统，7月11日开始试用今天又出现死机按键没反应，郁闷5000多中奖了，买了一块砖头，三星S7系统这么垃圾，每次还得重新启动，希望选择S7的朋友看一下差评，慎重啊，想退货退不了，	-1
在京东手机坚持就是坑。竟然被套保了。手机拿去检测竟然被检查出换屏。然而我手机根本就没有修过，叫摔都没摔过。。。。之后问朋友才知道，京东去年就有很多手机问题了，害的我现在廉价卖出去。	-1
在处理产品质量问题时服务态度非常差！！！	-1
在太阳光下，有一条条的暗痕，就跟进水一样，联系客服一直联系不上，不知道是店大欺客还是怎么的？？	-1
在线客服有问题敷衍二句直接不理人拽的很，先不说手机好坏买完货都没到就掉了一百找客服推来推去最后直接不叼你。	-1
在网站订购的时候说32g的没有货，就买的64g,结果第2天，一直没有人联系我，打客服才告诉我说配件缺货，缺货为什么我下单的时候不说？？？？然后给我分单，现在手机用了2天了，最重要的无线充电器还是遥遥无期！！！感觉很恶心	-1
在购买新机三天后，正常使用中出现了重力感应失灵的问题，在网上一查。不光是我一人。很多朋友也都遇到了，纷纷都退货或者换货，我已经申请售后了。朋友们都看看自己的机此功能还正常不	-1
坏的，还好退了，总是频道死机重启	-1
坑，买的时候是最好的，没过几天就成次的了唉&hellip;&hellip;心里不平衡，降价优惠太快了	-1
坑人的预定	-1
坑啊，用到今天太多就啊 一个月都没有！主题发疯 发烫 指纹解锁更难用！手感还差的无法理解！关机重启后图片乱码！等等的问题！还贵感觉不值！完全是为了DC的信仰 可耻的是还骗人！没货还预售！	-1
坑的一笔 大家别买了 分期买的变成 不分期 这不是欺骗消费者吗	-1
垃圾	-1
垃圾	-1
垃圾 用了不到1个来月就坏了，反复开机画画，一直开不了机。京东返修要求等待一个月的时间，一听就来气 评论还不给骂人。	-1
垃圾 质量有问题，手机看电视看的好好的，竟然自己瞎跳，不知道怎么回事，都好几回了。	-1
垃圾 买回来相机就有问题	-1
垃圾 用了一天就通话异想！	-1
垃圾 被别人用过 屏幕在反光的时候看 不光泽 按键灯亮有漏光 换个屏幕的手机也卖	-1
垃圾， 卡成狗，流畅度还不如我两年前的iphone6 上午买，现在就后悔。	-1
垃圾，不好用，二手处理掉了	-1
垃圾，不是盒子扔了真想退款，真的狠狠怀疑我的这个手机是是不是别人用过的卖给我的，建议朋友们还是买东西要慎重，特别像手机这种，早知道在实体店买了，为什么在京东上买的新手机还有删不了的插件，刷了机都还有，气死我了！	-1
垃圾，最不满意的一次购物	-1
垃圾，刚买了一个月解锁之后自动锁屏，有时候解个锁要好几分钟，真不如买苹果了，真是没法比，是不是还来个自动关机，玩个王者荣耀有时候都卡屏，同事用一千块钱的国产机都不会出现的问题。	-1
垃圾，刚拿到手机屏幕就有划痕，客服还不管，垃圾三星，手机用了两天就卡！千万不要买	-1
垃圾，发热恐怖，内存85恐怖，降价恐怖。简直吓人。	-1
垃圾，太垃圾了 回来第二件上网屏幕跳动。 去售后检测 人家说不包&hellip;为了客服 客服让他们打小票给他们邮寄过去，他们收到小票，才给我换手机。里里外外还要等一星期。 用的质量问题 不是正品&hellip;大家不要上当	-1
垃圾，屏幕上有黑点	-1
垃圾，我钻石会员，还买了plus 会员，可是这几次买东西，竟然都不给我寄纸质发票，明明我选了纸质发票，问客服，客服说我没选，就默认的电子发票，我真是草了，这几年也在京东花了十来万了，以前从来没出现过，最近这几次都这样，上次买相机，也不给我寄发票。客服说可以再给我寄纸质发票，但我要出邮费，我不差那十块二十的邮费，但我不要了，就是给差评，连续几次了，忍不了。	-1
垃圾，手机严重发热，待机短，老死机，更严重买了十几天就掉价*，	-1
垃圾，手机发热严重，有划痕，包装也不太好。说好的12期免息，结果还产生了300多的手续费	-1
垃圾，手机只要使用就60多度。发热。操	-1
垃圾，手机后置摄像头拍照模糊不清，	-1
垃圾，手机电池不用就跑点	-1
垃圾，收到后屏碎了，京东还不管	-1
垃圾，用了不到两个月，就出现翘屏，左上角！到售后去，换了一块屏幕，用了不到一个星期又是翘屏，之后拿过去售后还不管了，我打三星400电话投诉之后，售后只是给我把屏幕重新粘了一下，第二天屏幕显示全是条纹！打电话给京东，只能呵呵了，一句能售后！	-1
垃圾，送的赠品也不一样，而且还少送了几个	-1
垃圾，那么贵的手机。用15天自动死机，再也开不了机。lj京东返修差不多10天了，没回来！	-1
垃圾，降价，看来三星真的不行了&hellip;抵制抵制&hellip;&hellip;	-1
垃圾。。没距离感应。。	-1
垃圾。破手机，一点都不没用，	-1
垃圾。耳机接口是坏的。插进去 耳机会弹出一小截，要一直按着 才不会弹出来。跟人语音 一直按着耳机口 才能听到别人讲话。自己讲话还会有噪音？ 换手机麻烦 就不换了 东西是真的垃圾。亏我这么喜欢三星。找客服 客服 会叫你去 就近的 维修站检查。 我去了。 那个SB居然说我手机壳的原因 耳机才会插不牢 敷衍我。 懒的在去，只给1分 差评。	-1
垃圾三星！支付了618定金什么优惠都没有，不支付定金买反而送U盘和相机，不想说了，真是让人寒心了。这个态度谁还敢买！	-1
垃圾东，偷梁换柱，赠品都换了，本来就冲着无线充电器和手环才在京东买。不然早在**拿了！	-1
垃圾东西，触频屏经常不灵，发烫，狗，日，的，棒，子，，才买多久，降价八百多！！！！	-1
垃圾东西，通话自动挂	-1
垃圾中垃圾手机，不到一个星期就死机，花了这么多钱，买了这么一个破手机，手机动不动就死机，关机都关不了，触摸还总是容易出错，手机电池一点也不受用，大半天就没电，手机刚买回来的时候被装了各种软件，和客服反映也没有管，到底是京东出问题了，还是三星出问题了呢，为什么出现问题了没有一个人管了呢，怎能真的黑心，这么没有良知和道德，京东和三星的总部您们为什么也不审查您们的员工和供应商呢，挣完我们消费者的钱就不管不问了，您们的信誉在那呢？	-1
垃圾中得极品！一点都不好用！就有个外观好看点！而且刚买一个月掉价掉了一千块！！！！！这要是在等几个月是不是免费送了！！！！什么玩意	-1
垃圾中的战斗机，屏幕不灵老是卡，点一下不行经常点几下，内存说是4g,拿到手就用掉2.1g！还不能删除！总之卡的垃圾的一比	-1
垃圾京东	-1
垃圾京东 尽卖假冒伪劣产品 不给解决	-1
垃圾京东 拉老子进黑名单 食屎去吧	-1
垃圾京东，不送无线充，那是三星免费送给用户的，狗东就是这么垃圾	-1
垃圾京东，买的手机让开发票，客户告诉我选不了增值税的话，去普通发票上备注即可，现在就不承认了，不给解决，天天315投诉你们，买了这么多年东西，没见过这么垃圾的服务。	-1
垃圾京东，竟然骗钱。大家买东西尽量换不同商家买，不要让一家独大。	-1
垃圾京东，预定被坑，今天一块看还额外送赠品，变相降价，以后再也不会参加预定了，坑比	-1
垃圾京东！！！我以后再买你们京东的东西我就死去！手机有毛病是小事，我换个货给我折腾好几天，一个这么小的问题要检测那么久吗？你们一开机就能看见有毛病，我真是纳闷你们还要检测什么？一发现有问题就应该给我把新的发出来！但现在还没动静，你们的办事效率真让人担忧！我这么多天一直在借别人的手机用！而且我花了这么多钱到现在手上什么也没有，这钱我要是存银行得有多少利息！你们负责吗？！！每次都给我一样的回答，让我等待，对啊，我除了等待还能干嘛？！以后没有人敢买你们的东西了，买完可千万别有问题！有了问题你要等好几年！！！	-1
垃圾京东只给京东差评。以后购买东西全部差评，差评，差评，差评，差评。	-1
垃圾京东店大欺客，一个月油漆脱落，居然说，属于正常，太可恶了	-1
垃圾京东搞的活动不认账，当时买的说是送500京券，结果现在打给客户他们，说不没这个页面，没这活动。买京东搞活动的商品一定要拍照，摄像。手机也换了3次，第一次手机打电话没有声音，第二次屏幕有竖线。不知道*交往的时候也这样的空承诺吗？事后不认账。顺便说一下我是钻石会员，绝对不是小号来无限的。	-1
垃圾刚买右上角就有磕伤照相不如s5屏幕也发白	-1
垃圾售后！！	-1
垃圾啊，垃圾中的战斗机！真心无法使用(我是苹果用户)	-1
垃圾垃圾垃圾垃圾垃圾垃圾垃圾垃圾垃圾垃圾垃圾垃圾垃圾垃圾垃圾垃圾垃圾	-1
垃圾垃圾垃圾翻新机京东卖的都是假货	-1
垃圾手机 看个都视频卡顿	-1
垃圾手机，中看不中用，指纹识别很差。	-1
垃圾手机，修了两次，并且出现同样的质量问题，不要在京东上面买手机，真心垃圾	-1
垃圾手机，刚买来几天就死机一次，后来又出现过，还t m诡异到自己触屏按键，此次对三星很失望，京东送个充电宝一直未用，用时居然是个坏的，无语&hellip;&hellip;	-1
垃圾手机，才一个月屏幕花屏后直接黑屏，以后再也不在京东买手机，上一部6s也有问题。	-1
垃圾手机，用一个多月老是掉线，打电话对方听不到，返回键失灵。垃圾垃圾一个月得手机要拆机维修，郁闷郁闷。在也不在京东买东西了。	-1
垃圾手机，用不到三个月就主板漏电，更换主板后又屏幕松动，以后谁还敢买，几千块的东西哎	-1
垃圾手机，用了一周，指纹识别不了，现在打电话也没有声音，我爸一直骂我给他买了一个这么差的手机。他工作忙，电话多，手机又经常出问题，真是气死人了。这辈子都不要买三星的手机了。	-1
垃圾手机，老出毛病，三个月跑了三次维修店，真后悔买这个手机	-1
垃圾手机！才用了3天屏幕就裂了，问售后他们说只能换屏幕，要*还吹嘘是第四代大猩猩玻璃，以后再也不买三星手机了！	-1
垃圾手机。买个着手机坏两次出现统一现象。都是屏幕花屏。	-1
垃圾手机买回来，就经常死机，屏幕乱闪像中毒一样乱开软件，不收控制。恢复出厂设置还是一样。这么高的价格无语	-1
垃圾手机啊大猩猩死代手机，从裤带里掉一下就碎了，就用了6天晕死！还是苹果好啊用了2年摔了n次才碎！买者谨慎啊！	-1
垃圾手机才用几天就自动重启，有时还卡住不懂，再也不会在京东买任何东西了，欺骗消费者，早知道这样就买苹果了，建议大家你还是去实体店买	-1
垃圾手机电话老是接不到，在家大家都信号满格，就我没信号，申请售后又没人理	-1
垃圾曲屏，中看不中用。使用体验就是，误触发严重，膜非常难贴，三星是有曲屏非要霸王硬上弓，其实一堆问题，根本就是摆看的，还特么卖这么贵，坑！！	-1
垃圾服务，垃圾机器，新机没有保护膜，也开不了机，申请退货!!	-1
垃圾死了，卡，司机。屏还花了。真是慢	-1
垃圾狗东临时私改赠品 无耻 偷梁换柱把我无线充换掉了 狗东死全家	-1
垃圾系统 卡爆。。。。。。	-1
垃圾货，不到一个月屏幕就裂了，**	-1
垃圾货，才买三四天手机背面就裂了。还不给返修还不给退货。就是骗子	-1
塑料材质，太贵了，不值这个价	-1
声音有问题，十分麻，录音有问题	-1
外形很酷，很帅，但是手机打电话会很烫！有点伤心。	-1
外形挺漂亮，可拿到手用了24小时不到，屏幕左侧就出了条竖线挂了~唉，质量实在是太差太差了。	-1
外形的确很好，不过屏幕坏了。反应没s6好，拍照也没想象中好	-1
外表没的说，但手机玩一玩就发烫，放到裤袋里时不时发烫，充电发烫，这是什么情况	-1
外观个人非常喜欢，到手后用了5天，感觉三星真是垃圾货。手机发烫，电池不耐用，触屏偶尔不灵，有时有漂移现象，还有死机重启现象。本次购物也是在京东最伤心的一次，卧式19日预定的是三星S6 edge绿色的，京东承诺的5月21日发货，21日咨询客服说等一周，一周到了但是迟迟不发货，到了28日我要求退货，开始还说不退定金，我没要赔偿，客服当即给我退了，退后我立马买的有货的金色。京东这次让人失望啊，三星更让人失望啊！	-1
外观很漂亮，但是很倒霉，摊上了一个残次机，经常屏幕会时有时无一条绿色亮斑线。去售后也没办法，因为时有时无，不可能在售后一直等着出现。很不好的一次购物，同等价位，推荐苹果。	-1
外观还可以，就是系统没有想像中的好，降价太快，后悔了	-1
外观还可以真心不好用还是奇苹果hao	-1
大品牌了，做工这么差home键居然掉漆打死在不买三星	-1
大大的差评，先是屏幕闪，然后音量键按不动	-1
大家不要买，不怎么样！手机屏幕不敢用。软件还总是闪退，客服也不管，售后也不搭理你。还不如买苹果了，这个质量真心不值这个价钱	-1
大家不要在这里买 会被骗的 明明有 促销 那些礼品 买回来 就没有 礼品啦 这个 真的 是骗人 垃圾 手机 上面 还缝隙有的大 真的没有苹果好 打开一看 就这么垃圾 唉 算了吧 算我倒霉	-1
大家别在京东买这款机子了，我6月2号下单，6月4号收到，6月18号出现待机花屏，当时机子还能用，就待机有花屏，以为是自己那里设置错了，23号的下午手机全部黑屏，根本不能用了，这么贵的手机才这么点天就这样，要是实体店的话那是能换的，当时实体跟京东也一样价，只是觉得方便，然后在京东也买了几个手机了，电话客服居然轻松的说要们当地修，要们返回去修，这就是电商，以后谁还敢上京东买东西。还有就是这么贵的手机才用20天不到出问题还得打开了修理，换谁谁能接受，这就是京东这么大的电商买出的三星手机，附上图片，这还是刚开机的图片，开了一会什么都看不到。我想给0分的，但是系统不让给，奉劝要在京东买的朋友慎重，最好在实体店买有保障。真是郁闷。	-1
大家千万不要在这个店铺买，手机不行，电池用不住质量不行，价格还贵，去实体店买便宜。服务态度没拍的时候特好，拍了就不行了，套餐里面的东西都是垃圾，谁买谁上当。发货速度特别慢。不要上当，切记。。	-1
大家自己看吧 屏幕有明显的亮纹 虽说随便换 但还是很伤心的 刚到手两个小时就出现这种事 而且是不定时出现的 我为自己的人品感到忧虑	-1
大家都不要再上当，这就是个垃圾手机、待机8个小时35%的电没了、各种卡、发烫严重、烫手、刷个贴吧烫、听歌酷狗都烫、真是太阳了狗了、今天卡的都想把手机给摔了，别他M上来就说无脑别玩安卓机。一个破手机折腾来折腾去有意思吗，现在要是京东给我退的话、果断换苹果去，三星真烂！	-1
太不保值，2个多月现在只值*元 拍照比Ｓ６e发热严重，指纹识别体验没之前的好，兼容有点问题，出现过喇叭杂音的情况，游戏难得死机，移动信号不行。	-1
太不好了，4g信号太差了什么垃圾手机后悔买了	-1
太卡了 网络又差	-1
太卡了，按键和屏幕都有划痕。质量不好	-1
太后悔了买这手机，刚用半个月就开始卡的要命，手机发热，微信还经常打不开，必须重启手机！6千块真不值！不如买苹果啊	-1
太坑了 用了没1星期 漏电随手撂了 摔可狠 估计修修要* ~~~ 还是打白条 损失太大了	-1
太坑了，才用了1多月就坏了，严重设计缺陷，重力感应快充后就会烧坏，有快充功能不能用快充是什么情况，然后很多功能都用不了，很多游戏、APP也玩不了。。。京东也没有给出明确的处理意见，申请退换货	-1
太垃圾，买回来一周没到屏幕就坏了。京东取货过了20天才发给三星。三星告诉我两天就能搞定的事情，他京东还要20天。比正常的贵了一倍也就这样的服务。还不如**了。	-1
太垃圾，屏幕没几天就开始闪屏，售后还不保说是挤压的，要是决定买的话一定要上个屏险。因为这个曲屏质量特别差，我去修的当天好几个人都是这个情况，售后都说是受挤压导致的内屏裂了！我也是无语了！谨慎吧	-1
太垃圾了，刚过7天第八天降价，还不补钱，要在京东买东西要长点心啊，最后一次在这垃圾网买东西了。	-1
太垃圾了，手机还可以，你等我给你说说物流哈。京东难道就是为大城市开的吗？我这里是个县城没错，但是也是有很多快递公司的呀，韵达、圆通、中通、申通、顺丰好多都有，就不能给我发这些吗？五六千的手机你给我发个快递能死啊？非要发邮政（不知道京东和邮政有什么奸情），你知道邮政是怎么给我发的吗？从沈阳发货，沈阳发北京，北京发呼和浩特，呼和浩特发集宁（我就想不明白为什么给我发到集宁？），集宁发锡林浩特，锡林浩特发多伦！你们是要带它周游世界吗？头天晚上到的多伦第二天下午才给我送的件！完全不知道什么叫效率！以前在北京上班发的倒是快！现在就不行了！难道我这里也算边远山区？离北京也就四百公里吧！啧啧！京东早晚被邮政害死！差评差评！	-1
太垃圾了！不行	-1
太垃圾了手机发热电池也不行，退货还不给退垃圾垃圾	-1
太垃圾老，用了20天直接发烫黑屏，京东不换，只能找售后，哎，马勒戈壁，再也不会买三星手机咯，再怎么促销都不买，谁买谁后悔！！！！！！！！！！！！	-1
太失望，屏幕下方底线出现黑块，竟给我这样的货，差评	-1
太容易碎了！！！！不建议购买	-1
太差了	-1
太差了	-1
太差了，不建议购买，软塌塌的。跟塑料袋材质一样！	-1
太差了！以后不会再用这个牌子！40天就返厂！� � �	-1
太差了用了一个月就坏了返厂喊慢的要死	-1
太差劲了 第一天买的手机 第二天就送无线充电器 害的哥多花了300块钱 京东你这么搞 真孙子	-1
太差劲了，当天收到手机左上角就有没吻合好的水纹状的瑕疵，收货当天申请换货居然说要等7-15个工作日来审核处理，看能当天送达才下单，京东自己卖的产品有质量问题，不能即时处理，总之收了你的钱产品出了问题你就慢慢等好了，也不告诉你什么时间才能换台没问题的机子！	-1
太差劲了，满五千减四百就是没有银色，我买了黑色第二天就有这个活动了，京东太差劲，不要买，买的都是退货的机子！	-1
太恶心了，刚买了就大降价了，有没有个价格保护期啊？	-1
太慢不好用，不能与苹果比	-1
太慢了！！	-1
太慢了吧？这也叫&ldquo;快&rdquo;递？	-1
太气人了吧，昨天刚买的，5888,今天在三星旗舰店居然看到那才5399，而且赠品比京东还多，一直以为网上的就便宜，看来以后要转变思想了，考虑要不要退货	-1
太烂 花屏了 用了4个月 还是苹果好	-1
太烂了，双面胶粘的!	-1
太让人失望了，买了不到半个月的时间，逛网页的时候就不定时的出现闪屏现象，三星不是又像两年前Note2那样，卖问题机吧，现在打算拿去检测了，觉得三星实在是太让人失望了。之前我们家的人都是用的三星，现在一个个都开始换了，都让三星伤透了心啊。	-1
太辣鸡了，才买了几天就降了800，实际亏了300。还不如去店里买呢。居然说什么有赠品就不让申请价格保护。刚好过了7天退货时间，要不直接退货	-1
太难看 了，买了就后悔，背面那个摄像头凸出来太高了	-1
失望 刚买了第二天就加赠无线充电器 和意外险 32优盘 手机套应该补发礼品	-1
失望啊屏幕黑边一条粗一条小，影响整体视觉效果，要退货&hellip;&hellip;我不是傻瓜！三星！	-1
头一次在京东遇到这样情况！气死我了收据内屏里面肉眼可以看到灰尘没给退！呵呵京东买了这么多还是头一次遇到没给处理的！差评差评差评	-1
奉劝大家别在京东所谓的自营店买手机了，前一秒问好的赠品，一下单马上就不承认了，截图给京东客服也没用，反正就是他们说怎么样就怎么样，买手机还是去实体店吧	-1
奉劝大家别在京东甚至网上买这种贵的东西了，首先，下单的时候显示的现货，四天都没发货一直在调配中，客服说没现货，而且页面还是显示现货。这属于恶意营销欺骗消费者。然后收到的手机前摄像头和听筒都有点偏的，包装和保护膜都撕了退不了，说叫寄回去检测如果是硬件问题才给换，要7-15天。打三星客服电话问了说这样的不能退到售后工程师调一下就行了。我就想知道这样的手机怎么流到市场的，真不知道京东在哪儿来的货源。不要图赠品多，无线充电根本就是s6 的底座。气死人了。想着不是很大的问题将就用了。再次奉劝还是到实体店买，而且检查好再使用。	-1
奶奶个蛋 ，三星又是bug，按键偶尔无法唤醒屏幕，虽然评测说是系统bug，可能更新后修复，屁，买个手机还等你修BUG，为什么不修好再卖, 还移除了谷歌框架，搞个锤子，自己的日历烂到一逼屁用都没有不能用谷歌日历，自己的应用商店全他么要安腾讯应用宝才能下，用户还不如直接安应用宝啊 ， 装什么三星应用商店，没APP算什么商店。移除框架后装google store 还得root，本来就是谷歌的系统，移除框架搞什么。 干	-1
好	-1
好丑，5688买垃圾	-1
好像发错了货。怎么处理？	-1
好像被拆机过 在京东买了这么多东西 这次真是伤心了	-1
好几千的手机用一个月就坏了，还是大问题	-1
好卡啊。。。。。。	-1
好是好看，就是发热，发货不讲诚信	-1
好看没用，做工不行，边框都能塞纸，拍照广角畸变！ 这代很失望。买来边框内还有磕痕。 还有这个七天无理由退货就是坑。爹。讲好听的。	-1
好菜啊 曲屏应用自动消失 赠品也没有无线充电座	-1
好麻烦，售后成问题，后悔买了。	-1
如图，刚到手不到20天就成这样了	-1
如图所示，屏幕左下有个半圆形黑点，京东购物以来最失败的一次购物，东西收到以后没碰没磕，收到就有这个情况，虽然说可以维修，但是，我想每个购物的人都不希望自己的物品收到的是一个维修过的产品。在京东购买过很多产品，以后应该选择京东前，会更慎重了。	-1
如果不给星可以评论我一颗星都不想给，货发过来居然开不了机，任何反应都没有。退回去换货居然等了近半月，办事效率太差了。发过来新手机终于能开机但是没第一个做工好，一个角有点往里凹，好像这是这个手机存在的普遍问题好多人都反映。好在外观不错，手机速度也可以。	-1
如果你有至少半个月的时间与保留证据的运气以及一个大心脏，请来三级店	-1
如果可以不给星，我一个星都不想给。手机真的不敢恭维，音乐外放时直接不能听，去客服检测，竟然回复&ldquo;三星的手机都有破音，这是正常现象&rdquo;。三星手机买完直接降价，想买s6的亲们，要慎重，别给自己找麻烦，建议还是买苹果。无语啦！！！！各种奇葩！！！！各类坑die！！！！	-1
如果可以零分我就打零分，手机发热严重，用了不到一个月时间，保护各种完好，爱惜的不舍得一点点的磕磕碰碰，手机屏幕花屏了，先是局部变色，一个小时后全部花屏，现在屏幕完全黑了，手机百度S7花屏，全是一样的情况，这种案例比比皆是，这是三星这款机子的集体缺陷，是严重的质量问题，当初在购机前，在苹果与三星中犹豫好久，因为是送老婆的，最终选择的外观更胜一筹的三星，结果证明真的是金玉其外败絮其中，苹果如果出现相同情况直接换新机，三星只能给你换屏维修，而且最长有可能要耗时60天，花了那么高的价格，最后买了个残次品，真的特别失望！！！如果三星和苹果中间二选一，不要犹豫，选苹果！！！！	-1
如果能点100个差评 我肯定给你100个 不想解释 白条24期免息 让多少人 看着广告来的 最终用不了 客服自己都承认 确实反应白条24期失败的人挺多的 买手机的路太曲折 3月20号申请投诉 4月8号都没解决 然后告诉我过了15天就没办法了 拜托 是你们拖着 拖到15号的	-1
妈 的 提前预定买的 等到了18号搞促销 又是券抵扣现金 又是多送好多礼品，联系客服要求价格保护 等了24小时没消息了 售前是大爷 售后是孙子！	-1
妈了逼，我买的时候怎么没有无线充电，真**坑	-1
妈的，人家买都有送无线充，我买就送几个垃圾（一个32G卡，两个垃圾软膜，一个自拍器）有屁用？难道我付款的钱比别人少？死京东就是在骗人！	-1
妈的，手机玩起来能烫死人。只是一个后悔，还有点卡	-1
妈逼！降价真快！一月没到！降了四百！	-1
安兔兔跑分到99会卡死，有一次没卡才跑9万。别人都跑13万。肯定手机有问题，已经申请换货	-1
安兔兔跑分才九千多分，看到别人同样的机型也许是处理器批次不同，人家能跑一万三千多分，是不是京东拿的货都是良率很低呀？	-1
安卓手机真垃圾&hellip;&hellip;旗舰机&hellip;&hellip;还不如 iPhone SE 流畅呢	-1
安卓机皇，优缺点机锋和贴吧都有，夜拍没有科技美学的夸张，不知道别人怎么调的，可能有问题吧，手机经常下水，另外送来的时候包装完好，但是拆开后屏幕两边的膜里面有灰尘和一些像丝状的东西，明显是有人退回去的，申请换货了gd来电说是正常的出厂难免会占灰尘，你tm是在逗我，然后说只能退，不能换，退的话优惠券就不返还了，没办法然后就不退了，手机是没什么问题，这样说就是向大家证实ershou东是真的，尽管你手机是未拆封，这个看运气吧。二手d也是大家买了又退回去造成的。	-1
完全不一样，看电视剧声音很模糊，很吵，用了一星期了，很容易卡住，死机过两次，打电话别人总是听不到，特别不满意！！！ 但是急着用 就懒得退了，下次再也不再网上买手\n机了，好坑，绝对拆机过得	-1
完完全全的差评，买来一直没用，用的一个星期主板竟然坏了，忽然间的无法开机，去售后竟然是主板快了，售后电话竟然告诉我说过了保换期一天无法更换，京东给修就要30天，您愿意等就30天，京东规定的；给我一个方案就是我自己去找三星的售后，自己去修吧，用了不到十天主板坏了主板坏了主板坏了，谁能想到啊主板坏了 主板坏了；对了还有说是PC下单赠品没有，退了手机下单就说你是恶意的下单！！！！！！京东的手机到手16天，试用不到十天，主板坏了主板坏了 建议不要买够，去实体吧	-1
定的银色发的黑色，严重怀疑成都二号仓出库人员有明知银色没了故意发个黑色的来糊弄。也存在出库的时候是银色，装箱被调包为黑色，调换出原有货物，交黄牛吃差价的嫌疑，希望彻查	-1
宜兴都不想给，质量一塌糊涂，用了三天就开始各种毛病，京东要求开三星公司的检验报告，我这里开好了，问什么时候能退款，说还要和三星公司核实，那你拿我检验单原件干什么啊，脱裤子放屁，直说不肯退款咯	-1
实在不想来评价，送给老公的礼物，手机本身很好，给一颗星，我只想问京东白条优惠券有个屁用，还说免息免服务费神马的，结果用了也不免息，咨询客服，客服让问京东金融，京东金融说因为有赠品所以用不了，你那个手机拍的时候就带赠品好不，再说你宣传的时候也没说赠品和优惠券不能同时享受优惠活动吧，京东金融又说让问客服，客服又说让问金融，把客户当皮球那，看到好多人都是这个问题，我只能说我们被骗了，垃圾京东，最后客服说给20块的券，我那时三百多，你给我20顶个毛啊，骗子，失望透顶	-1
实在受不了了，这手机太卡了，不知道是我自己这样还是全部这样，还不如16款A7流畅	-1
实在是无语了 一直买回来没照相 今天一照相 前置镜头尽然非常大的一个黑点 我都服了 也怪自己 17天才发现 现在不能退不能换 只能忍了 看看有多大的瑕疵吧 我强烈建议京东特殊情况特殊处理 不要被时间限制	-1
客服4040服务态度太差。	-1
客服好！预定手机到了为什么下订单时商家承诺的赠品没到？？？	-1
客服态度极其恶劣，打电话问保险的事，没等说完直接给挂了，到是三星的客服态度比较好，给解释了很多，保险经理的回答我很满意，本来不想写，不过这客服也让人接受不了了，句句答非所问，不知道京东怎么会让这种人在团队里做事？？？	-1
客服打了N次 一直没解决下来 刚客服来电了说泳池里的水是流动性的把我吓到了硕大的泳池就他Y六个人 然后我说是不是把手机放在水桶里就不能拿起来了 因为手放在桶里会碰到水就有流动性 呵呵他也说不出个所以然 还有大家注意一定不要淋雨是流动性的 。我是在浅水区1.3米的位置照相手滑一下就掉水里了然后叫人帮忙捡一下手机 时间不超过两分钟 注意这手机的防水测试是水深1.5米可以浸泡半个小时 。手机进水完全不质保当然客服还是挺体贴消费者的说出500大洋的维修费 才买两天的限量版你们要是觉得这补贴很人性化的话我也很支持你们拖鞋 。其实很不想砸京东的牌子毕竟我也是这的 砖 石 会员 .完完全全是欺骗消费者一出现问题就把问题全推到消费者身上 只要钱一到手管他三七二十一的 要买这手机的再斟酌一下 我也一直在用三星感觉也挺好用的 到谁能保证一万台手机不会出现一台次品 不说了我去12315了自手机寄给京东都二十几…	-1
客服是到底有没有人嘞，不管怎么发消息都没人理，真的是无语了	-1
客服服务态度差，开个发票开不出来一只推脱	-1
客服特别不负责，明明备注了也不看，发错了东西。	-1
客服相当恶劣，一个手机屏幕裂了，居然叫自己拿到售后服务去有偿维修！什么破京东，亏我还是好多年的老客户了！	-1
客服真垃圾，当初问她充电板是不是原装。什么都不知道。拍了官方套餐，现在发现B套餐才是原装。	-1
客观的说，手机的外观，屏幕，功能都不错，不过这个价位的手机散热如此的差真是想不到，用一会就热到不行，电看着往下掉。。。失望。。已经申请退货。。	-1
容易坏 各种问题 垃圾手机 第一次用三星 真心伤了 以后再也不用三星的啦	-1
对三星越来越无爱了，	-1
对于这个手机我只能说无语，渣渣，用了一个月按键全部坏了，哎，京东让我去修还让我用牙刷刷刷，什么态度哦，去修好了，过来一天又坏了，我也不想和他们纠缠了，只能认命。	-1
对京东客服非常不满意，太垃圾了	-1
对京东很失望，说好的有无线充和运动手表确没有	-1
对京东真是无语了，才买得几天人家*直接降价*，申请价保也没用，说不是京东降价，京东你叫我今后怎么支持你。	-1
少送了我一个手机壳，只能给一颗星了，不能再多	-1
就一个字，三星手机烂，才买了没多久手机就弯了！明明手机质量问题，让我自己跑维修部，还硬说是我自己压的，手机前后屏幕都好的，中间的金属环弯了，三星的老板你来给我试试怎么压能压弯，质量如此烂怎么能让我还支持，拉低国产的品质！一个星都不想给！！！	-1
就一个手机，套子呢？膜呢？上个月买的还有的	-1
就一个问题 屏幕看这太难受了 客服也什么都不懂白问 不是让我退就是让我换 真没意思 真不懂 为啥是绿的	-1
就不应该在网上买东西，麻烦事太多了！	-1
就不说别的了，买的金色，送来的白色	-1
就是屏幕会发汤，其它的还可以！	-1
就是玩王者荣耀太卡了 郁闷	-1
就是电池不好，充电器不安逸，其他还好	-1
就蝙蝠侠本身来说 5星都不够 这个1星打给京东 预售组合付款不支持白条 结果到现在货源依旧充足 还能24期免息白条 把我们当初付定金买的当猴耍吗？！多个客服推诿不办实事 真心不想说什么了 再说说包装 送的无线充无比的脏 手机包装就这么扔纸壳箱里了 连个缓冲物都不舍得放？！	-1
就这么寄过来了，因本人不在家寄放到别的地方，我说里面是手机跟人说下别给我摔了，快递小哥都不信， 连个防摔或者别的字 什么都没有，打开以后拿纸盒固定也就算了，您到给我弄的好一点，手机包装盒上再垫点什么！太不像京东的作风了，以后不会来京东买手机了，包装信不过，这要是碎了我哪说理去！	-1
就这台机子问题太多了，第一：机子经常性发热，第二：机子疑似次品机1机子不具备全国联保只限京东售后服务或维修，2机子玻璃屏幕有两个地方凹进去（贴膜时出现内心真空）。如果够这款机子的朋友请选择其他渠道购买，不建议在京东购买，出现问题时致电京东售后时间长又不能解决问题。	-1
尽管换了新 出了这问题以为还会给好评嘛 不会	-1
屁都不是，拿到手机，直接开不了机，直接换货，10天了还没个屁消息	-1
居然会自动重启	-1
居然坏了！这是什么质量？	-1
居然无法使用4G网络，有点后悔买这个手机了！	-1
居然没有发票，~~~~打电话给客服还说发票还要出钱才给我发过啊	-1
居然用了两天出现屏幕有亮条！！？？申请换货中。	-1
屏保贴膜根本没用	-1
屏太容易碎了，轻轻一碰就有一条裂纹，差评，个人不建议再买三星的产品！越来越贵，质量越来越差，以前的三星还行。	-1
屏幕一摔就碎 也是醉了	-1
屏幕上方缝隙太大了！充电时候还总接触不良！发热程度恐怖！草！	-1
屏幕上方靠近前摄像头的位置有一黑点	-1
屏幕上边角与机身金属框的缝隙奇大，进了好多灰，好像被撬开过，要不是付款方便，一定不会在京东买这么贵的手机，以前买的HTC M7背壳也翘边，与机身有很大缝隙，如果不是次品还能怎么解释。雨客服联系说不是质量问题，拒绝退换货。	-1
屏幕不咋地，已经有划痕	-1
屏幕与边框链接有缝隙，漏光，一圈都漏，本来期望很高，	-1
屏幕中间有划痕，老公喜欢就没换	-1
屏幕会卡死 然后自动重启 花屏 很不满意	-1
屏幕发红，懒得换了，商品一分，其余满分。	-1
屏幕发黄、电量不耐用、速度没有传说中那么流畅、还容易发热	-1
屏幕右上角电量百分比上面有瑕疵！求解释！	-1
屏幕在光线下有水印，屏幕质量有问题	-1
屏幕大小 【赠品】三星 GALAXY S6 Edge 透明保护壳（ 银色皮套和金色皮套)都没送来，还欠一个金色三星 GALAXY S6 Edge 透明保护壳，希望尽快送来。	-1
屏幕大小合适么？系 8.31日买的，提示要9月2号才能到，这也就算了。9月1日晚查看物流进度，惊讶地发现京东显示订单已完成？！物流显示9月1日早上我片区的某某快递员已出发，接着订单就完成了！？我连快递员的电话都没接到，更别说收到货了！这么贵的东西怎么可以这么随便的走流程？？京东你出来解释一下这是怎么回事？明天真收不到货投诉到底！！！ 统用的习惯么？配件质量如何？快写下你的评价，分享给大家吧！	-1
屏幕大小合适么？系统用的习惯么？配件质量如何？快写下你的评价，分享给大家吧！	-1
屏幕大小合适么？系统用的习惯么？配件质量如何？快写下你的评价，分享给大家吧！	-1
屏幕大小合适么？系统用的习惯么？配件质量如慢慢慢~何？快写下你的评价，分享给大家吧！	-1
屏幕大小合适么？系统第一次在京东差评，看见有很多好评，但是我这次要真心说几句，希望购买者看到，考虑好之后再买，第一，京东发票，里面的日期是你下订单日期，也就是说你的商品不是7天和15天退货和换货，这个再你购买时，京东不和你说清楚，第二，如果手机有问题，京东取回检测时间要7到15天，检测出问题才能换货，没有再给你退回，这也是在你购买之前，京东并不告知。第三，如果你去三星客服自己检测，你发票的时间可能已经过期啦。三星并不给你出检测单据。第四，京东客服还说，15天内出现问题换货。必须在15内，你的检测报告也要出来，否则不按15天换货处理，只能修，也就是说如果你手机14天时出现问题，京东是不按15天换货处理。大家看看吧 ，这就是京东售后，自己的霸王条款，希望大家购买的时慎重，我买的手机用了没几天就出现问题，京东客服就一直拖着，一直到15天之后，告诉你只能自己去修，*的手机，没用几天，只能去客服修…	-1
屏幕大小合适系统用的习惯配件质量好？	-1
屏幕大小还可以 就是烫的厉害 新机就这么烫了 一直都用三星手机，这次买的最走眼，差差差评， 以后彻底跟三星说拜拜了	-1
屏幕太容易碎了，三天就碎了	-1
屏幕太小	-1
屏幕实在是太碎了。一摔就碎了。	-1
屏幕居然有坏点换货中很是郁闷	-1
屏幕左上角内部有一颗灰，已经送去售后开检验单。抢首发就是为了提前上手，没想到还要等一周。有可能两周。坑啊	-1
屏幕左上角有暗斑，盒子有折皱，退货中	-1
屏幕左侧的缝隙明显比右侧大！！！并且，轻微地按压左侧会凹陷，而右侧就不会！！这算不算质量问题呢？看包装也不像是拆过的，难道一出厂就是个次品吗？我很想晓得大家的手机有没有这种情况？	-1
屏幕左侧里面有很多小黑点，严重的问题，已经申请换货了，希望下一个不会出问题！真是不愉快的一次购物啊，哎&hellip;&hellip;&hellip;	-1
屏幕已经碎了 屏幕质量太次 修一下要1300 凑合着吧	-1
屏幕很深的划痕，我知道退货麻烦，所以将就用。但我随时忍不住就会退货	-1
屏幕易碎，，更换价格暴利~~	-1
屏幕有一块被磕了，很明显，希望能换一个.	-1
屏幕有个坏点，一直没时间去修，如果京东换货我就没得用了，也没换货	-1
屏幕有个黑点，话筒有问题，申请换货，这么明显的问题居然送回厂家出检测报告，周折10多个工作日才出处理结果！要是在实体店人家立刻跟我换新了！京东服务越来越失望	-1
屏幕有坏点 已经退货	-1
屏幕有点小，手机卡取卡方式很麻烦，设计不合理，新买的手机，手机卡套取不出来，你说这手机买的！！！！糟心	-1
屏幕有瑕疵点	-1
屏幕有蓝色坏点，因为出差将就用吧！	-1
屏幕有问题，虽然换货了，但是心里超级不爽	-1
屏幕有黑点，刚过15天就没办法了。15天内发现还好，过了这个时间就只能认倒霉?。找售后，人家会跟你说：要不你先用着，给你申请*的补偿！！！别犹豫拿着*吧！不然最后连这都没有（我就没要），还要自己找售后，到处跑，花时间，花精力。最主要还没用几天就拆开换屏！！！	-1
屏幕有黑点，怎么发的货，要求换货，太不负责任了	-1
屏幕特别容易碎。贴膜都能贴出裂痕。真的不值这个价钱。后悔购买。	-1
屏幕玻璃有2处划痕，HOME键也有划痕，请问京东：出厂就是这样，还是退货处理后再发出来的？不过不影响使用，懒得折腾了！差评是给京东的，第一次差评！	-1
屏幕碎了，太不给力了	-1
屏幕脆的一比，太容易碎了	-1
屏幕误触多，电池不经用，充满看视频最多四小时就没电了。	-1
屏幕里有坏点 懒得换了	-1
左上角，黑斑，花屏啊。我中奖了。只能退了	-1
左上角屏幕和边框有缝隙，大约有两个厘米的长度，右下角同样，能塞进A4纸的厚度。电信4G信号不稳当，信号强度不如S5，给1星都是客气的。	-1
差	-1
差 赠品下单不肯送。发票也不给	-1
差劲的手机，微信视频渣渣	-1
差差差，	-1
差评	-1
差评 ！差评 ！差评！一万个差评 之前看到评论说店大欺客 我还以为是是有人故意的 没想到我遇上了 客服服务实在太差 纯属店大欺客 手机就是有点小问题。偶额sim读不出来 卡是新卡 手机也升过级 也没用 倒是不影响使用 本来就想咨询一下 结果客服爱答不理 和他说手机问题。他让找这个那个的 最后实在没办法 让他给我投诉电话 他拖半天 不给我 直接调成忙碌状态 下面截图就是这个客服 希望大家还是慎重考虑下再买 售后实在太差 有问题 就是能推就推 反正以后再也不回来了	-1
差评 一颗心都不想给 买来第二天就死机 维权 售后都是屁 以前在京东上有人也说过东西不好 但是自己没碰到过 不相信 现在在是真的 再也不敢买了 几千块钱的东西就是这样	-1
差评 差评 差评 差评 差评 差评 差评 没有诚信的商家\n 没有诚信的商家 没有诚信的商家 没有诚信的商家 差评 差评 差评 差评 差评 差评 差评 差评 差评 差评 没有诚信的商家 没有诚信的商家 没有诚信的商家 大家小心了 大家小心了 大家小心了	-1
差评 手机在兜里踹了两天屏幕就有刮痕，无线充电热到爆说618没活动让赶紧买 然后 又送这送那的感觉被坑了	-1
差评 货不对版 客服强词夺理 再见。	-1
差评，一买就出活动送拍立得，预定购买的反而没有！	-1
差评，买了十几天，卡机N次，有的时候还会跳屏，缝隙较大	-1
差评，今天下的单，第二天收到货就降价了，问客服申请价格保护，客服说价格没变，变个法降价，不符合补差价，让退货，刚开始说给我2000京豆。	-1
差评，刚买回来就有问题，什么意思。	-1
差评，刚买完，第二天就掉价600元，坑人，	-1
差评，刚买就便宜*，手机还送错，	-1
差评，差评，差评。 1由于发票上没有标明手机特定识别码，售后不予检测。 你们售后换货要求提供检测单，京东的问题。 2手机问题：屏幕左上方的弧面处，下音量键中间位置，有小点，漏光。黑色图片效果明显。 3手机购买时间还没到7天，退货栏已经消失，只能换货和返修；客服说话有一句没一句，不怎么搭理。	-1
差评，我一星都不想给，移动电源根本没送，让客服补发鸟都不鸟我 和苹果售后差距真大，而且照相没苹果好	-1
差评，我买降600，买完变成降900，还送无线充电器。绝对差评	-1
差评，手机充电时起码有60度&deg;。烫到手都痛	-1
差评，手机就从口袋里掉下去屏就碎了，外观挺漂亮，但用一段时间后系统就没有那么流畅了，换屏要1500以上	-1
差评，手机屏幕有坏掉	-1
差评，手机用了没几天，手机发烫发热，网络有时候还停网，用了没几天，手机还特别卡，看个视频还给我退出来了，气死我了。	-1
差评，提前预定等7 8天，现在礼品也比以前多，销售手段真拙劣。	-1
差评，提示下单赠送原装保护壳，到货没有，联系客服也不给解决！	-1
差评，收到货3天就降价900，不能提供价格保护，京东非常让人失望。	-1
差评，无法贴合 不好用 卖家态度的不好，爱理不理	-1
差评，是给京东的，京东的服务是越来越差，差到不要脸，买它产品买多了还不行，说是价保一个月，降价不叫降价，换个名叫秒杀，玩文字游戏，京东你太过份了	-1
差评，是给京东的，京东的服务是越来越差，差到不要脸，买它产品买多了还不行，说是价保一个月，降价不叫降价，换个名叫秒杀，玩文字游戏，京东你太过份了，	-1
差评，期待的或许太高了，看五分钟微信竟然开始发烫，使用了几天后竟然还出现了一次卡机，打开QQ出现慢动作。	-1
差评，没有发票！手机卡顿死机	-1
差评，白条刚还一半降价了	-1
差评，能一颗星都不给吗？手机生产时间是2015年上半年的，并且有划痕，怀疑是返修货，京东还不给售后，刘~强~东是不是以为自己很了不起啊，照这样子我看京东很快就要关门大吉了	-1
差评，被京东伤到了，买了一个手机壳，因为没及时拆封，现在发现型号错了，要跟京东换一下都不给换，简直是太伤心了	-1
差评，降价太快，之前手机出了一点问题我都忍了，居然还降了这么多，再也不买三星了，差评，差评，差评，差评，重要事说四遍	-1
差评，降价太快了，不合理	-1
差评！！！开机屏幕是有颜色的，几秒钟之后就变成黑白色的了	-1
差评！客服骗人！告诉我内存卡没货了让取消，以后都不赠了，结果我拍完第二天就有了！！！	-1
差评。买的手机，当时京东网页错误，点击发票没点击上，找到客服联系发票，承诺没有费用，寄来后有15元费用，而且发票还不对，买的手机，客服再三确认，买什么开什么，我买手机，你给我开办公用品，我维修谁负责	-1
差评不解释。预定的都懂	-1
差评主要给京东，本来开开心心买个机子是挺好的，今天上来买相机的时候手贱看了一下发现才几天就降价*。联系售后说不在价格保护周期内了，还企图用二千京豆打发我，给我两万京豆可能勉强可以考虑一下。之前就听说过跳水八百块，没想到自己挨了*。个人觉得，价格保护周期应该是看降价日期是否在客户收到机子7日内，而不是要客户自己在7日内来申请，谁那么有空盯着你是否降价呢？总之（买个教训，后来的同志们记得申请价格保护，别被无耻京东坑了。 关于机子，外观很炫，但是侧屏确实是鸡肋，而且很容易误操作。耗电快。	-1
差评啊啊啊啊。发票没有！！！！！所有的人买都是礼盒包装的，我的就是一个纸箱，而且里边没有任何保护措施，泡沫什么的都没用，就是散落在里边。这个要怎么售后，有知道的亲麻烦告诉一下吧。	-1
差评差评，第一个差评是给手机，我手机才买一个月，就开不了机，质量存在很大的问题，第二个是给客服，态度极差，明明上面写的销售是可以上门取件，结果还要自己去寄，还要自己承担运费。而且说修不好没办法，也不换货，太差劲了。以后再也不在京东上买东西了。	-1
差评差评买了就降价900	-1
差评差评差评 说退货马上答应 叫他签收就说有伤痕 还照相发给我 我说本来就有的 （因为我签收了才知道是手机到就我还以为是衣服到了 签收就才知道是手机我就没有打开过包裹中午签收下午退回去）他说 叫我叫快递 开证明 他应该知道快递不的开 然后我就叫快递退回来 然后我看手机有划痕的地方 跟本就没有任何划痕 我不知道他那张有划痕的 图是哪里照的 应该早就准备好了的 太气人了 然后手机也有问题充电的时候太烫了我都怕爆 最少在我体温以上的温度太烫了 还有送的自拍神器也是烂的 买的问了他可不可以插内存卡说可以 买回来插哪里 插你屁眼啊 不可以就说不可以为什么要说可以 我买东西没给过几个差评 这是最差的一次 这手机不值这价 亲们不建议买 我不知道那些好评是怎么来的	-1
差评差评差评 重要事情说三遍 17号晚上买的 赠品中的 无线冲 手表 价值* 临时换掉了 换成价值*的内存卡 和*的移动电源 这是多坑 京东这是欺骗客户 要求补偿 ！	-1
差评并非针对产品，京东店大欺客，作为京东老用户，一步步成长为钻石会员不易，京东却以莫须有的罪名黑了我的账户，使得我无法正常领取优惠券，也无法使用京豆兑换优惠券，也无法购买抢购商品，无法参加促销活动。原因是京东为了牟取暴利，开发出&ldquo;京东卫士&rdquo;风控系统，把客户分为三六九等，在后台对老客户做出限制，手段肮脏，过河拆桥，卸磨杀驴。如此摒弃老客户，就是忘记了自己的立足之本，迟早也会因此将自己亲手埋葬！	-1
差评是给三啊星的，尼。玛撒一个月降1000	-1
差评给j东的。预售没先发货，18号才收到，金库返现100没有了，一年屏保什么的没有了，那叫我先全款预订干啥。在说手机，做工不咋滴，缝隙都对不齐，山寨？贵一千块就多个弧形，才弧了那么一点点，功能又没什么。无线充电左下角发热厉害。说实在是不想果6烂大街才买这个，很失望。不能贴膜，什么膜都翘边，送的壳已经掉色，其他没试了，看这次这玩意能顶多久，一年后还能值个3000块不。建议别买，不差钱的随意。我是图个新鲜，弧形屏幕，不烂大街。	-1
差评给京东 赠品跟广告的完全不一样 这是自营哦 不是第三方居然做出此等忽悠消费者的事情 完全颠覆了对京东自营的一贯信任 完全是自毁长城 手机本身很喜欢 比想象中稍微厚一点 先用着	-1
差评给京东，之前预定的没有无线充，现在买的有无线冲，这就是对消费者负责？就这么对待在京东上预定的客户？差评，简直就是**，再也不在京东买手机和任何电子产品！	-1
差评给京东，这么多年来第一次写评论，服务态度差，说好有货结果付了钱说没货，欺骗消费者，客服态度傲慢，蛮不讲理。一星都给多了，去你MA的狗东	-1
差评给的是京东的信誉!预定的人都懂得，不解释。手机怎么样用后再说。	-1
差评送货慢。首发什么赠品都没有。结果618当天送一堆赠品还能用券，承诺的以旧换新e卡一直没有给到，投诉多次结果说是采购与三星的合同条约又问题需要再更新简直无敌。差评到底	-1
己掉漆	-1
已打315，举报拉黑店铺，新机，三星S7曲屏64G用了20天不到有问题了，不给换，新机给我维修谁能接受，就是这么坑害普通群众的吗？那我要是用16天坏了，差了不是两三天而是一天，也是只修不换吗？谁能接受几千块的新机器返厂维修，这钱就当给卖家和厂家平分做棺guan材cai了，算是第一次买这么贵手机，体验很差劲，说是24小时给我解决，老子等了三四天，音讯全无，望广大朋友慎购。	-1
已经不想说了，买来一个月京东返修一次，自己修两次。 要是能退我立马就退了。	-1
已经使用一个月了 手机速度够快 就是使用时发热 特别烫, 烫手我都不敢再用了	-1
已经坏掉了	-1
已经用了快半个月，出了发热快，电池消耗快，客服服务差，屏幕下方一片红，价格变化快。其他没什么好说的了。	-1
希望以后不要发送不合格的电子产品了。浪费大家的时间、金钱。	-1
帮我处理了差不多一个星期还处理好，三星果然是尿道循环，现在还没我手机消息？	-1
帮朋友买的，送到就是坏的。退货申请了半个月，要搞清楚手机坏的关买家什么事？效率差，手机方面售后差，在我的朋友圈子京东手机销售名声已臭！	-1
帮朋友代买的，希望没问题。我个人讨厌三星，垃圾质量！！！	-1
广告宣传的很，其实是手机中的垃圾，实在太难用，经常死机，斜频更垃圾。	-1
店大欺客，用了两个星期不到触摸不灵，软件闪退，客服一直欺骗搪塞，没有质保公章，三星专卖店根本不承认！！！一定会向315投诉！	-1
建议大家买之前还是慎重！我今天第一天用，已经死机将近10次！ 还不停的掉网然后又重新联网大概也有7次。我不太确定这是三星手机的问题还是京东的问题。我已经申请退货了，整个流程下来到退款 不知道大概需要多长时间 希望京东可以解决我的问题。这本来已经开心的事 已经浪费了我时间 影响了我的工作效率！ 同时再用苹果iphone6plus 觉得苹果还是稳定太多了！	-1
建议大家别在京东买这些东西，推卸责任的功力真的很强，与其花钱买来这么多麻烦，不如别买！	-1
开不了机啊！换货，收到之后好的话在追加	-1
开了快速充电还是要三个小时，严重怀疑买到假货	-1
开机一看，屏幕碎了！是不是能再送一个？？？	-1
开机后左下角曲屏部分有10x3mm左右的黑屏，申请退货。好不幸运啊！	-1
开机熟悉就发热，手掌肉厚容易边上误操作。触屏偶尔不灵	-1
开箱后原装膜上有指印，用了两天各种发热，完全不像新机。屏幕极其不耐用，半年前在苏和谐宁买的s6，裸奔了半年屏幕完好，这个s7才几天屏幕上就有划痕了，难道s7屏幕比s6还差？ 另外就是赠品和发票，苏和谐宁直接和机器一起寄来，京东什么都没有，问了客服各种搪塞，现在还没个消息。 总之是一次很差的购物体验，唯一还行的可能就是物流了。	-1
弄丢了手机，态度服务差，快递不给力。	-1
弧屏没个卵用，系统垃圾。价格贵	-1
强制消费，骗子	-1
强烈建议不要购买，误触很频繁，免提功能用不了，只要开免提对方一句也听不清楚，这是我在京东购物第一次给差评，之前在京东购买的三星A7都比这个好多多了，不介意误触不介意免提不好的话就买吧，至少照相不用美图了。	-1
强烈要求补差价，降价幅度简直无法接受！游戏卡顿，基本告别大型手游。膜不好贴，几乎摔一次准备一千多，不建议大家购买！	-1
当小白鼠了，屏幕左下角有漏液，黑色不能显示，曲面屏才出没多久，百度了一下，中奖率还挺高的，关键京东还不给换，还钻石会员呢。不是京东自营尽量不在京东买，商家成本高，东西自然贵。在京东入手这手机，慎重。	-1
当时明明和客服说了要换黑色的，结果等了这么多天，收到的还是绿色，已经心力交瘁，第一次失败的网购体验，从没给过差评。	-1
待机时间真的很短，电池不耐用，像素不错	-1
待机时间短，外观一样，自带软件太多，功能不实用，后悔购货！	-1
很一般不如苹果	-1
很不好的购物体验，我是28买的手机，而六月一号就有领券立减的活动，领600减300.别人花4788买的和我花5388的一样，我还只用了三天不到。打客服问说优惠券不给补差价。说让我退货重新买，来来回回最少半个多月，我想想还是算了，就这样吧，反正总体下来就这样，手机不错，体验不行。	-1
很不满意，买来就偶尔黄屏，以为是小概率事件就没有管。结果现在一个月了，黄屏已经严重到无法正常使用了。现在已经过了退换货期限了，只能返厂维修。	-1
很不满意，刚买了一周就降价了800元，而且用着不是太流畅，有种被坑的感觉，差评！	-1
很垃圾，刚用才一个多月就屏幕闪屏，售后说是外力造成漏液。无比垃圾的产品。	-1
很失望！相比S5并没有多大的使用感受提升。双卡双待不双通，要是插了内存卡就要牺牲一个手机SIM卡的位置。最重要的是，信号超差！！！！！！！！！曲面屏增加了单手操作的误碰导致点错地方。电池或许因为信号问题，用不了二十小时。	-1
很失望！部分功能有故障，超过七天不肯退机，难过！	-1
很失望一次购物，开开来就有坏点，目前已经申请换货&hellip;而且快递员明明说好的6号来取回快递也没来，呵呵。	-1
很失望很失望，机器没有啥惊喜的，送的手机壳割手，膜基本没屌用，发票不给我，还电子发票**我买那么多次东西就这次电子了吗。要发票还要自己承担运费。	-1
很好，京东物流很快，特别好	-1
很好很好很好很好很好	-1
很好的手机，就是刚刚买两天就降价了，给他们发信息也不回，态度不好	-1
很好的手机！很差的配件！极差的售后服务！！！\n货到即发现送的充电器不能正常使用，多次请售后解决均粗暴回复让找个当地维修，我才买的新品有什么道理要找维修？？？售后就是拒绝那还要售后干嘛！！！	-1
很差，很差，很差，很差，很差，很差，很差，很差，很差，很差，的客服听不懂人话，就知道忽悠人，机子比苹果6贵用起来没有苹果好，唯一不错的就只有相机。	-1
很差，手机有很多问题	-1
很差劲，第一客服答应送的手机保护膜没有送到。买手机前看有手机保护壳，也没有送到。反正很差劲！	-1
很差劲的一次购物，三星质量真心差，用了不到两天屏幕就出现亮点！！！价格还那么贵。以后都不会再买。	-1
很烂的手机，很倒霉的购物，到货之后，屏幕是坏的，换货，折腾了一个星期，收到新手机中间的键上都是划痕。	-1
很热，已退。买就是坑坑坑坑坑坑坑坑坑坑坑坑坑坑坑坑坑坑坑坑坑坑坑坑坑坑坑坑坑坑坑坑坑坑坑坑坑坑坑坑坑坑坑坑坑坑坑坑坑坑坑坑坑坑坑坑坑坑坑坑坑坑坑坑坑坑坑坑坑坑坑坑坑坑坑坑坑坑坑坑坑坑坑坑坑坑坑坑	-1
微信视频聊天辣鸡	-1
心中只想说草！怀着希望买了个破手机！不但卡死还没法重启！！！	-1
心塞，左边屏幕一拿到就有条线，什么玩意儿啊，瑕疵品也能卖这么贵？？？	-1
必须差评，专员出尔反尔拖了十几天承诺也不兑现，该办的？不办留个邮箱不回你留什么邮箱，维权群一样情况差异处理见人下菜碟，你们不是来解决问题你是来解决我来了，彻底寒心了 这几天的事能写本书了 太精彩了，你们都不如房屋中介经纪人有底线 ?	-1
必须差评，我要求开局发票谁知他们拿电子票来糊弄我。对此我十分气愤跟客服也讲不通道理，没发票我送给朋友可以吗	-1
忒别差劲，无理由退货各种条件卡着，手机下载软件屏幕烫人都	-1
快递 太次了 都不问人名就给了 万一給错认了呢！	-1
快递员态度真差，只好投诉，你绩效没了怪我喽	-1
快递员说要先付钱，再验货，我付了钱要验货，快递员调头就走，说有问题找客服。京东，你就是这样调教员工的吗？对得起我这个钻石会员吗？	-1
快递哥依然给力，手机就是这么垃圾买了没几天就黑屏，然后线充充不上电，退货也告诉我所不行，超过7天不能退货，有质量问题也不行	-1
快递太烂，一开始关机，开机以后也不送货上门！！什么服务	-1
快递好评，不过手机一开箱就发现磕痕，因为要回老家了没时间换货，只能将就着用了	-1
快递小哥很给力，大半夜都给送来了，开始打开使用信号差，机器有问题，启动KNOX主动防御后要求重启手机，然后手机就开始无限重启了。15年5月份的库存。正在联系换机中，退换货的速度超长，不能接受，总之这次购买很不愉快，这是最后一次京东购买东西了，我只想说 操	-1
快递很好。三星客服也不错。。就是京东客服太差劲了，一问三不知，真不知道你们领导咋会用你这样的客服，买手机。手机到货。赠品没到货。明明可以先发手机，这个脑残客服0520却说我这边没这个按钮。没法先发手机。建议我取消订单！。我说把您们电话电话客服给我，她说电话客服和在线客服一样的。结果我自己打过去，电话客服很爽快的解决了。。先给我发的手机！人家就能解决你为啥不能。。哪怕说，我先帮你问问这句话都没有。。直接让我取消订单。。我要是你领导早把你开除了。。你二缺不缺啊。。0520！京东客服！	-1
快递很快 就是什么赠品都没有 连个贴膜都没	-1
快递慢的不能说，最后不是本人签收的	-1
快递挺好挺快，态度也好，包装完好，但是拆开包装不像新机，背后有小划痕，还有很多指纹，申请退货后让我拍照，然后联系客服一天多了到现在一直没有反应，差评！因为普通百姓，所以这么难申请吗？？？	-1
快递挺给力，下单9点半，收到4点半。3G卡不能用，说明书太简单，开始重启，关机均不听话，提示音不知何时出来了，音量太低，字体太小，也还算是三星老用户(s4)，忙不赢，不知没有用过者怎么办，首次用户体验不算好。	-1
快递真的很慢很慢 十二号买的 今天才到 赶双十一买的 到手一看 只有手机 什么都不赠 手机上连个最普通的膜都没有	-1
快递说下午送，结果上午就给我签收了。一直对京东很信任的，结果京东就是这样对待信任的客户的！你下午送就下午送，干嘛上午就给我签收。经过我同意了么？然后收到摄像头就是无法对焦，问客服客服让我打三星售后，晚上还没人接！白天都在上班谁有时间联系你？明天问下售后。已经做好退货的准备！果然棒子的东西靠不住？	-1
快速充电没两天就坏。垃圾	-1
忽悠顾客，送什么保险，都是假的，保险电话老没人接，妈的，给你差评，大家不要信，没事还好，有事就推来推去，妈的	-1
怀疑不是合格产品 感觉摄像头拍照不是很清晰而且屏幕比我之前用的红米还黄 拿来跑安兔兔分数只有10w 已经申请换货	-1
怎么不支持移动4G	-1
怎么买的手机在安兔兔上跑分才4万多不到5万？为什么？	-1
怎么感觉充电发烫啊&hellip;&hellip;	-1
怎么才用2个月相机就没用了，刚到手就常出现死机	-1
怎么说么？手机确实好用，但是一个果冻屏让它成为麻烦。放在包里没有任何挤压和碰撞，仅和钥匙放一起，拿出来屏居然碎了。任何一个人对新买的爱机肯定都倍加呵护，就是这样，从用到碎不超过三天。最戏剧的是在碎屏前一天京东保险还电话给我要我投保，说很多人屏都会碎，我用手机向来小心所以没投。没想到第二天就碎了，后来看评论真的很多人会碎屏，感觉曲面屏的硬度要和普通屏差很多。叫它果冻屏一点不过分。另外注意，但凡有坏，京东保险是不能再上保险的，毕竟他们是要赚钱的而不是真正帮客户处理问题，可以理解。只要买这款手机你就认定了它质量合格，所以不管屏脆不脆，只要损坏就是人为破坏，三星售后不会受理。去三星维修站，换一个屏成本1800元，而且还要预约。所以建议大家除了花*还要加碎屏保或者买个带盖的保护套。	-1
怎么说呢 坑预售的。真会玩 集体差评	-1
怎么说呢，一次很失败的购物，手机收到没有电这就算了，贴了钢化膜没注意左角有污点，因为手机没电没办法检查，贴了膜后我看见左角有污点以为是钢化膜上面的没在意，因为是双曲屏一般都不会注意，今天把钢化膜拆了 是屏幕里面的，这手机本身有问题，申请换货，客服打电话说什么挤压液体流出，这个没大脑挤压屏幕还不坏啊，再说了那个屏幕是大猩猩4玻璃的能挤压坏？说什么去检测，花费要自己出，我要的是解决问题不是听你来说废话的，这就是推卸责任一套一套的，所以大家买手机一定要注意我这种情况，京东现在已不再是正品网站了。真是失败的购物。	-1
怎么说呢，其实我满想给满星的，送货和服务态度都很好，我一般也不留评论，直到今天手机出了问题，上个月13号下的单，15号到的货，这个月6号晚上屏幕突然变色发绿，我也没在意，到了深夜直接给我黑屏，开关机和指纹识别都正常，我想屏幕多半出问题了，又没摔，又没进水(即便进水你也是防水的啊），让我严重怀疑了质量问题。	-1
怎么说呢，如果是水果转过来的，可能会失望，确实系统差距挺大的，使用感受没有水果手机好。 不过这个绿色确实挺好看的，但是需要不带壳，一带壳这手机完全就没啥亮点了，现在应用下载的不多内存用了大概25%左右，用的时间长了会卡，相机启动再快也是在新买的时候而已，正常使用后基本是没有那么快的。 所以最后总结这手机呢，就是好看，真的不带壳，确实很好看，绿色的，其他颜色不太喜欢，但是实用性确实不如水果，而且日后如果出手卖应该折价也蛮多的，所以买这个得想好，如果你足够喜欢这个外观和颜色，可以买，如果不是那么喜欢，就还是踏实买水果吧 个人建议 不是苹果粉也不是三星黑 再次重申自己很喜欢这个手机，就是用起来没有那么流畅	-1
怎么说呢，维护权益，差评吧，应该是退换货。在京东我买的单反也好，这次的S7也好，设备里面有的标签总是皱巴巴的。这次手机更离谱，有一小标签还有撕下重贴的痕迹，原先的胶水痕迹还在那，瞎吗？？打开手机开热点给旧手机，一开就有本手机热点密码，这&hellip;！！以前新的手机肯定不会有的。	-1
怎么说呢，虽然知道三星不保值，但京东的这个价格策略着实让人无法接受，从5688到5388，我下手买了，然后就看它价格5288到5088，我咨询价保，回复说是市场价波动，这到底是市场价波动还是你京东在操作，京东心里自己应该很清楚吧，价格继续波动，18号凌晨4889还是多少的我忘了，到天亮了又恢复到5688减400券，4千这个价格我没意见，毕竟凌晨嘛，有点秒杀的意思，其他价格我很想骂人，对于机子本身，三星嘛看的多了也就那样，不多说，这一星完全给京东的那些做市场策略的**！谢谢！	-1
怎么说咧，手机用十天后手机屏幕坏了，自己莫名其妙出现了粉红色的异常画面，还容易发热。	-1
性价比太低太低了 出来没多久就降价了 三星以后吃新机大家千万别急着买 太垃圾了	-1
性价比超低，一买回来就出问题，售后服务太差。	-1
总共三个按键，现在全坏了	-1
总是自动重启 后来演变成直接关机了	-1
总是黑屏 屏幕偶尔自己动 打打字突然就卡住了 三星啊 也就这么回事儿了 不知道怎么回事儿	-1
总的不错，不过我好郁闷，买了不到一个星期就跌价了，抓狂。	-1
恭喜我成为又一个接盘侠，正面手机膜上和背面把膜揭下来后手机机身上愣大的指纹我就呵呵了，你们的品控都下岗了吗？	-1
恶心 最恶心的一次网购了 说好退换货的 到了竟然说按键划伤！骗子骗子骗子骗子骗子骗子骗子骗子骗子	-1
想买手机的朋友，希望能认真的看完。 手机颜值不错，我当初也是被颜值迷惑，决定舍弃华为和苹果买三星的。 手机唯一让我感觉不错，就是照相功能。实话照相比不上苹果，但比较清晰，夜拍较清晰。 手机运行内存4g，可用3.34g，但三星一些无用的商店，应用就占掉1.87g（见图，刚开机截的图）。 而且隔几天更新的程序，占用的内存明显越来越大。这些系统自带无法关停的程序，直接导致发热问题。 手机50多个发热问题（见图，关不掉的程序），。 就算你什么也不做，手机也是微热的。打电话手机明显发热，微信视频，手机热的烫手，想直播的朋友，1000的手机可以正常直播，但它不行，不到20分钟热的能煎鸡蛋，再过几分钟，直接热保护关掉程序。 售后的态度： 我因为发热问题找过售后，手机微信视频五分钟，明显发热严重（同时视频的手机，明显凉很多）。售后摸摸说正常，我说用鲁大师测温度，售后说鲁大师垃圾软件，第三方他们不考虑，我…	-1
想骂人，5k多买的机器，卡的要死不说，有时候电话也接不了，我也是醉了，一颗星就不想给！买京东那么多次，最差的一个！要不是老家用了10多天，我都给它退了，太jb差了	-1
感觉S7就是垃圾手机根本就不值这么多钱，用了没几天屏幕就有划痕（正常使用），难道就这么脆弱。运行大一点的软件会卡，而且黑屏过几次，手机发热现象也比较严重，这样的体验根本对不起这个价位。	-1
感觉上当了，*承诺的赠品一样没发，现在跟我说赠完为止，去你大ye	-1
感觉上当了，当时看是送镜面保护套！没有保存截图，后面就变了。哎，非常不满意，差评	-1
感觉像假的，后悔死了	-1
感觉没什么性价可比。	-1
懒得退了	-1
我4月20日收到该手机，开机不到两小时，屏幕就开不起来了，你说这么贵的手机的质量靠谱吗。那更让人无法接受的是京东的换退货处理，于23日售后收到这问题手机，至今也10整了，至今客服天天告诉你7-10天，7-15天，天天告诉你耐心等待，天天告诉你尽快处理，金牌用户尚且如此，看以后你们还敢在这里买手机！	-1
我7号交的定金，13号付的尾款！18号收到货，这些我都忍了！不过后来下单又多了这么多的赠品，那我们交的定金是干什么用的呢？买个被耍的名额吗？我想退货重拍！客服说了，定金不退！*绝对的牛逼啊！我认栽了！	-1
我一直对京东的感觉不错，，经过了这一次，我算是知道了，，付完钱后服务差得要命，，，30号付的钱，今天都20号了，货还没有到手，我催了好几遍，12号催了 是立马就发货了，但是不是原装的，又申请退货，一直到20号 我还没有收到货，打客服电话说我给他们发过去的不是正品 正在核实，我问是不是只能等，客服的回答是 只有等这一个办法。唉，还不知道什么时候收到货。。。。。。	-1
我不想多说什么。请大家打算买这个手机的朋友直接看图。这款手机我是4月3号拿到手的。到现在2个月了。手机出现彩色条纹。检测报告显示是LED故障。新手机俩月就出现这样的问题我很无语。网上也有很多朋友是类似的问题。所以请大了慎重购买。	-1
我不知道说什么好，一个重力感应坏了，要检测3天还没出报告，一直显示拆包，到底是拆包还是拆机？	-1
我严重怀疑是翻新机，要不就是样机，刚拿到手就有问题，自带软件都不能上网，也不能更新软件，打开三星商城里下载东西，会弹出一个乱码的提示栏，最下方有行字，无法联网，只能点取消，我使用几天不注意有点磨损，京东售后不给我换，于是拿到三星售后给我维修了，影响我使用，影响心情，我去你祖宗个逼，我去你祖宗个逼的，这辈子不买京东的东西了	-1
我也不知道是什么原因，用了几天就开始卡机.真心不舒服	-1
我也是无语了 10天 降价* ，坑人么这是！！！！！！！！！剁手东	-1
我也是金牌会员了第一次遇到这种情况心里非常不爽，明明我买的时候有几样赠品。收到货却什么都没有，差评 差评差评	-1
我买了刚好15天，价格降了800这15天这么值钱？能不能考虑下我们这些先买的人	-1
我买手机从来没见过不送膜的，差评	-1
我买的是货到付款的手机。对京东配送人员差评，不允许买家先拆快递包装再付款，那我付款了里面不是手机我找谁去？？？京东在线客服态度极差，不能解决买家提出的问题！！！手机机身小细节处理差，做工质量问题！！告诫大家买手机最好去实体店！	-1
我买这款手机3.18抢购的，现在两个月多一点。现在手机在京东维修部。响应并没有他们评测的那么夸张，实际使用内存没有超过1.5G，开启6个以上应用卡不死你。坏的原因是CPU温度过高，屏幕完全花掉了，去三星维修工程人员告诉我不是特例，并且即使是工厂都没有找到具体原因，目前仅仅是换屏。我的本来还能凑合着只有一点黄色能用，现在屏幕完全花掉了，搞笑的是现在我连他们维修的短信和电话都看不到了。所以说有些东西还是不建议网购了。并且建议再买一块手机哦，因为一旦坏了，维修期是需要10天哦（买新手机的路上）。再上几张还能用时的图吧。	-1
我们是双11活动的时候买的三星 Galaxy S6 Edge+（G9280）32G版 雪晶白 全网通4G手机当时买活动上说的是打白条免息免手续费的。到了我们要还款时又多出了*的手续费。这样纯属欺诈行为，以后还怎么能放心的在网上购物。	-1
我刚把电话卡放进去怎么也打不了电话把装卡器取出原来是电话已经掉到里面去了&hellip;&hellip;晕了什么烂手机？	-1
我前天买的，昨天到的，今天就降价900，太夸张了吧有点	-1
我前脚买的手机，不送无线充电器，后脚就送无线充电器，心理是极度不平衡，打客服电话，客服说那只能怪你倒霉！	-1
我去，还给不了差评？礼品全没齐，包装普通包装，	-1
我只想对那些在苹果和这款手机纠结的朋友说，不用任何思考，买苹果！这款除了颜值，其余然并卵！就这样，买了就用着吧	-1
我只想说，处理的好慢啊，给我发了个漏液的手机，这个不是重点，重点是换新机好慢好慢，好在最后处理的还行，售后态度很好，没有完全对京东失望。	-1
我只能说是我运气太差，在京东买了这么多手机，第一次买三星的居然要换机，自动重启，花屏，程序停止响应，太糟糕，而且售后居然要近半个月时间，太失望，去三星售后维修点说我是第一个出现这样问题的，5688的手机居然会出现这样的质量问题，寒心！！！	-1
我只能说曲面触屏不怎么好，玩的时候不敢动曲面。充电时手机超热，都能煮鸡蛋了。我们都当了小白鼠。	-1
我好用了两个多月，电池鼓包，手机发烫，虽然外观挺好看，但是这手机真不值这个价	-1
我媳妇买的婴儿车里面有活老鼠，以后都是一颗星	-1
我家不用床板，所以床垫是直接铺在地上的，结果就那么点高度，顶多有个18cm 手机从床板上掉到了地上，还是木质的地板，这屏就碎了，呵呵...以后再也不买三星的手机了，华而不实，垃圾得很	-1
我就想问问大家，你们买到后电量怎么样？我打开包装是53%电量，看了看应用程序不到半小时就32%！你们也这样吗还是我的这台电池有问题。半小时20%怎么用？	-1
我很想说为什么没有发票呢？真的想不明白	-1
我怎么感觉机子象翻新机呢，才几天就卡的不成样子，买来的时候屏幕和边框还有不可忍视的缝，今天早上自己重启了，卡成翔了	-1
我想给0分的，可惜系统不让。非常失望，非常失望，非常失望的一次购物体验。该手机居然不支持VOLTE，简直就是欺骗感情，都什么时代了这样的手机还敢不支持，真是no zuo no die的节奏，从此以后对三星说bye bye。	-1
我想退货 机子死机	-1
我才买半月就降了八百我去，真够意思	-1
我才买的几天的手机 就看到下面有张2014年8月的照片。能给个说法吗。不行就退货得了	-1
我才使用一个月，就经常死机，每天要死上3、4次，每次重启完都还是无法使用，要重启很多次，重启完后，电量会减少百分之二十左右。现在京东的质量真的很差！！我申请售后维修，竟然要维修30天！！！我对这次购物非常失望！！	-1
我擦 不保值啊 我买的时候5688 现在4888 ，真的。 第一次用三星，只听人家说用几个月会卡没说会发烫。是发烫严重。 无线充电都不敢用啊，用网线充电发烫要到40多度。 虽然不卡，发烫有点让人担心啊。	-1
我擦，第一次用三星，下午到，晚上突然黑屏，再也无法启动。真是服了。三星品质啊！！！！！！！！！！！！！！！！！！！！！！！！！！！！！！！！！！！！！！！！	-1
我是27号购买的，那时还说送价值200元的京东，之前问客户说收货七天后就会有，刚刚又去问客户，说没有记录，问我拿截图，气死了，现在活动过了我那里去拿证据去维权。。。一只都信任的京豆现在令我相当失望	-1
我是三星忠实用户，现在是越来越失望了，1、无线充电有时不能充电，2、反应速度是越来越慢，3，无线网络和3G网络接入速度也很垃圾(与我老婆的GUO5相比，她的已经用2年了)，4，电话进来的界面会变化，而且不能修改，开车使用是非常危险的，5，个人觉得曲屏就是扯蛋，一只手使用的时候反而不好用，容易误触，6、除了拍照还可以，基本没有什么优点，	-1
我是四月二十四收到的时间 用了两个月不到 第一次看到这个手机真的超喜欢 但是越用感觉越不行 程序会经常无响应 微信多的时候会卡住不动 两个月不到手机就这样 真心觉得不值 当初还不如再加几百买6S 这手机真的就是好看而已 个人感觉不值得购买 我已经后悔了	-1
我是特意上来评价的，真的很想骂人。。。。客服太不专业 太不靠谱，上线咨询10个客服。能专业一点么。能么？作为一个京东的资深用户，真的太失望了。客服的服务态度那叫一个好，但是不能解决问题！！！！！！！！！！宝宝非常生气！！！！！！！差评！	-1
我是真实买家。垃圾手机。最垃圾的是触摸屏。抖动不止。还卖这个价格。	-1
我是首发17号当天买的到25号先收到货太慢了，说好好有什么意外险送都是假的京东忽悠消费者的，其它配件是多的，最垃圾就是贴膜了两边曲面玻璃贴不到的早都把贴膜掉垃圾桶了，三星s6edge手机质量太差了，三星公司出厂的产品有质量问题啦买了一星期发现玻璃里面有小黑点了，还信号极差，充电的时候手机发烫稍微开几个程序慢慢开始发烫，有时手机发烫的时候有自己打开程序才闪来闪去的，换货的审核问题太慢，5月3日申请换货到现在都6号了还没审核完成我对你们审核进度太不满意了申请的时候我没上传照片，后来我叫JD客服帮我上传去售后审核的	-1
我晕，用着用着要蓝屏，自动重启，我都懒得调换，估计又是个坑。	-1
我次奥，我点的12期免利息分期，今天突然看见没有免利息，而且还要一个月还清。真tm的什么玩意。	-1
我特么服了啊！进网许可贴在手机外面 问了客服也不让撕掉！这是闹哪样？ 贴在外面给谁看呢？	-1
我用淘宝七年多了，这次是真心不满意。首先，机子一般，没想象中那么好，其次真心降价太快，刚买完付款，套餐就变更降价了，还有是客服态度太差，买之前很热情，买完之后不理人，尤其是叫22队长的客服，最后是物流太慢，走了八天。。建议要买的慎重再慎重！我都是实话实说，欢迎投诉我。	-1
我的发票呢我的发票呢我的发票呢	-1
我的因为屏幕有2个黑点，返厂维修了！！	-1
我的外放时不时没有声音要不就是有杂音！！！	-1
我的手机是在刚上市的时候买的，4月18日买的，到现在还没到三个月，手机一切都还好，充电器就不敢恭维了，直到上个月才有这种情况，刚充电一会马上接头那里烫得不行了。他们都说三星是很烫，但是这种烫也太不寻常了，我都怕充电了，怕爆炸了。到现在充电充到百分之二十就直接报警不能充电，现在手机没有充电器，别的充电器又不能充，最新版的手机怎么会是这种充电器。真是垃圾	-1
我的耳机呢？	-1
我的订单拆成两个，无线充电器和后盖一直没有货，当初买货就是 冲着无线 充电器去的，今天打京东客服说送的和卖的是不一样的货，而且不包质量，那质量不好的东西拿来做什么用。瞬间觉得被骗了	-1
我的这个竟然给我发二手手机！！！打来直接就是主界面，开机设置都没有，*你也是够了，红果果地卖二手货，以后再也不在你这里买东西	-1
我看中你的屏幕买的 买回来第一感觉就是很脏 白色背景下全是点阵 请把我赞上去都没我的HTC M8 屏幕舒服 三星这工艺我服 要不是要出去玩我就退货了 换货估计也换不到好的 差评	-1
我给差评跟配送没关系，我买了一个星期零两天，你就降价，一降就是800，可以的，我买的时候6088现在5288这是不能退货，不然高低退了，前两天手机有毛病我想退，我忍了，你这降价根本忍不了，京东太失望了，以后不会再考虑京东了！	-1
我老婆代收的，本人不在家，好像开机后不能显示系统软件，连设置菜单啥的都没有，请问是怎么回事？	-1
我肠子都悔青了！！！一个设置从头到尾都把你的操作，菜单的名称全读出来，每个命令的执行必须双击，电话肯定是打不出去的，因为必须双击数字才能输入，而且第二个数字就不能输进去了。这是啥手机啊，5月份本想给媳妇个惊喜，媳妇也一直当宝没用。今天回家后，我说看看手机怎么样啊，听广告挺好的，结果。。。。今晚是睡不着了！！！用二维码扫描了一下，还找不到商品。彻底晕菜了！！！	-1
我草，别人给我说三星机子容易卡。我还不信，现在我终于信了。才用了2个星期就各种发烫，各种卡了！	-1
我要的是铂金版。怎么给我发了一个白银的。下午拍的。第二天早上8点半到的货速度很快	-1
我觉得绝对是翻新手机 刚买回来就卡了， 还有时候触摸不了 算了 不换了 老子多的是钱	-1
我认为我就只会买一次三星的了，这手机除了外形是特别好看，高颜值，其他的我觉得真心没iPhone好用，昨天刚到的手的，王者荣耀可以卡飞起来，事先说明家里的WiFi绝对没问题，网速绝对ko的，然后下载了个欢乐斗地主，既然闪退，然后我卸载了重装还是闪退进不去游戏，手机重启了还是进不去游戏。还有这手机冬天用我觉得还行，至少可以暖手，就随便聊聊天，浏览浏览网页，都没打游戏都烫的要死，难道设计个防水是真的拿来降温的嘛，还有拍照功能也就那样吧，比一般的手机强点。总体来说三星除了外观并没有给我惊喜，切换应用的时候也频繁的卡顿&hellip;&hellip;	-1
我还买了两部，太差了！电池用电太快，发热严重！！！！	-1
我还能说什么呢，5月15日3999买的，5月31日用券3949又买了一个，今天的价格3888。京东客服告知手机7天内才补差价。买三星就要接收降价快。。。。	-1
我这个忠实的京东粉也不得不给差评，不是给京东，是给三星，手机刚买不到一个月，一直很爱惜使用，昨天突然就不能开机，送售后说主板坏了，要返厂维修。用了这么多年手机没有碰到这样的情况三星真让人失望，光外表好看有什么用，三星真该改改商人本色，好好做产品。请大家慎重选择这款手机。	-1
我选择了12期免息，然后还是要收我手续费，京东真是6得不行！	-1
我醉了，买了一个多月，各种毛病，每天自动重启好几次，屏幕经常自己乱操作，指纹验证也出了好几次问题，玩个游戏卡的要死还不如我之前的s6，真的是无语了	-1
我靠，买回来发现听筒坏的，去三星维修部，人家一看发票问我是不是网上买的，然后告诉我十张九张网上查不到。说只能维修，退或者换只能看发票查的情况，发票查不到就只能找京东换。	-1
截止今天满一个月，手机居然充不进电。。。。。。。。。。。。。买了垃圾吗？	-1
所有镜头都左歪的，换货之后还是歪的，品控有问题	-1
手势截屏不能用，后台程序自动关闭，询问客服互相推脱！总之很差劲	-1
手感不是很好，有点轻，拿在手上跟山寨机有的一拼，电池不是很耐用，感觉三星的品质有待提高.	-1
手感还不错，外观也很棒，就是刚买没有几天就降*，也太坑人了。	-1
手机 发烫厉害， 外观信号 不如 S6 总的来说 不如S6。。	-1
手机 快递神马的都不错 我11点抢的 京东居然把赠品给换了 太啃碟了 我的无线充电器 手表 给客服发信息他也不回 不想说什么了	-1
手机 有问题； 我24号买的手机 现在 屏幕不亮	-1
手机，垃圾电池费电太快了，半天就没电了建议大家别买，，用过的会后悔的。	-1
手机：高端大气上档次，某东：肯爹耍赖玩套路，打着618大促销，骗我买下后，立即降400，玩呢？某*、某*，赔我400块	-1
手机6.14拿到，轻度用了半小时左右，后盖有点发热但不明显，联系售后退货，当天下午1点审核通过但系统强制安排到6.15上午让快递上门取件，快递员来到后发现手机处有细微划痕（本人没任何不当操作，真不知道此划痕从哪来的，都怪当天没细看），让取消退单重新申请退货，就说手机有问题。我取消了先前的退单，重新申请了退单，发了照片。6.15接到售后的来电，大致意思是拿到手机的当天有划痕能退，第二天退的话他们发给厂商，厂商发现手机没质量问题的话就原件返回。说了这么多总结一下：1.拿到货尽快全面检查，京东很可能发瑕疵机；2.我是因为有划痕要退货，京东却说他们收到退的货再发给厂商检查没质量问题再原件返回，相当于我说房子采光不好，他说能抗12级地震；3.所谓的7天无理由退货就是个坑啊；4.那可是*个元啊，用个瑕疵机心里不爽啊。5.京东售后人员交谈中竟冷场了将近20秒呀，专业素质的应急把控问题还是专业素质的应急…	-1
手机一个月就换了主板。狗屎	-1
手机一收到，一开机运行内存就满了，全是三星自带无用的软件，还没法删。还说全网通的，我有买的电信4G号码，网速也慢，还不如S4呢。我S4都用了两年了，怎么感觉也比6好！哎！	-1
手机一玩手机就烫的不得了，不知道到底怎么回事，而且非常卡机子	-1
手机上装的很多软件都需要获取手机的通讯录，通话记录和位置才可以使用，拒绝的话就无法使用软件，无法保证手机的隐私，直接怀疑是间谍手机啊，也无法root. 是一款专门盗取用户信息的手机。	-1
手机上面有个细微的划痕特别不容易发现！电池特别不耐用	-1
手机不好，买了不到二十天就特卡，结果恢复出厂设置了，现在还是卡，都没下东西还这样。真心看不好三星	-1
手机不好，好看不好使，用了四五天就卡。	-1
手机不好root 占内存很高 所以耗电快 发热。刚买的没几天，就降价，非常不爽	-1
手机不好用，刚刚用了一天照相机就不能用，显示照相机错误、去售后刷机不能解决，售后开了检测单、果断退货。换了苹果6plus。	-1
手机不好用，感觉，不是正品，用了还没1个月就有点卡，手掌截屏开了也截不了，不能用	-1
手机不是很满意，第一品控把握不严拆开了一看手机耳机插孔处缺了一个口子，这我忍了，按键居然还松动的比较厉害，手机拿在手里感觉很轻给人感觉跟买了假货一样，电池也并没有宣传中的那么叼，这次购物很不满意！	-1
手机不行，，好卡，曲屏翘屏左右缝隙不一致，触屏经常无缘无故自己乱跳乱点 又不想申请售后，太麻烦，使用起来感觉好烦！！！	-1
手机不识别新去联通办理的SIM卡，iPhone用就没问题，换iPhone的sim卡同样无法识别，找客服服务也很差爱答不理的，回避正面提问，对京东真是失望透了！	-1
手机不错 赠品怎么每天换来换去的 刚收到手机 看到赠品就换成自己想要的了	-1
手机不错，但是刚买完一看又降了100。。。。jd你个js	-1
手机不错，但是没有发票，一问就是各种推托，京东真的越来越坑了&hellip;&hellip;	-1
手机不错，就不多评价了，大家都看到了。 对京东，非常不满意。 5千多的手机竟然用个京东的塑料袋就给我送来了，里面连个防摔防磕的泡沫都没有，真特么服了，京东穷疯了，就算用个破纸壳箱装也行啊。自拍杆纸壳都磕坏了，这手机没磕碰碎了还真挺结实！ 还有三星官网给的无线电充呢，手表呢，都让你们当饭吃了啊。 果断给差评。 一刻星送给快递师傅。	-1
手机不错，就是搭配销售的双11特惠的碎屏险太坑人了，客服打电话说这个碎屏险只在正常使用情况下导致的碎屏才会陪，正常使用屏幕会碎吗？虽然保险没多少钱，但感觉就是不爽，一次很差的购物经历，手机保险太坑人了。	-1
手机不错，缺点就是待机时间短，手机发热	-1
手机不错，赠送的东西简直是一堆垃圾，尤其是手机膜，完全把曲屏漏在外面，中间一个补丁，这种垃圾膜让设计这个手机的人要气死了吧，还有什么手机套，看到之后我就呵呵了，真是土的掉毛，这些赠品完全是降低了手机的档次	-1
手机不错，速度快，外观漂亮。 钢铁侠众筹就是坑 人的玩意，大家别上dang、	-1
手机不错，颜色太喜欢，接口有些毛糙，但运行非常流畅，暂未见接合处有缝隙，可能运气好，没感觉机身发热 对京东一定得是差评！差评！！差评！！！预先收了钱说好21号发货足足等了半个月才发！没货别装逼好吗！哪怕有个声明告知一下情况大家也都可以理解啊！我们花了钱连知情权也没有，客服也是顾左右而言他。截止目前，京东连一点歉意也没有！没诚信没担当！真令人作呕！同样的机型绿色赠品也最少。先交了钱也并没有享受到比最近购机的任何优待。下回大家一定预先保留证据截屏，维护自己的权益 工商局联名告翻它！	-1
手机不错！！！！但是购买过程中让人非常不愉快！！！本来18号到货的！！结果到好20号才到的货！！到货了心里就好想了！！拿出手机，打开屏幕 我勒个擦！！屏幕又有黑点！！果断换货！还有那个自拍杆！点拍照它就放大图片！完全拍不了！！冲了半天电 也是冲不进去！！果断换货！！望尽快帮忙处理！！！	-1
手机不错。不过618还大促。促啥？促完价格还低一百。哈哈哈。欺诈。赠品不是我要要的。你要送我就别说还有价格。你就别送我好了。骗子。差评。	-1
手机不错但发热，和小米一样发热	-1
手机不错是正品 用几天 帅呆了。。和上一次在京东商城购物 一样 后面有细微滑伤 虽然不注意看不见 但还是很影响使用心情 。。	-1
手机严重发热，买了两天后就降了100多块，说什么6月5号就是6月18的价格，赤裸裸的欺骗，再也不相信垃圾京东，我这个账号再也不用了，没诚信的京东，真坑人，有本事不要删我的评价，我是说的事实。	-1
手机严重发热，充电也烫手。正不正品都难说。充电器线很细，还没三星闹特4线粗呢	-1
手机严重阴阳屏幕，耳机还是坏的，拆封时候用测试软件测试耳机插口和充电插口已经用了100多次！想换货又特别麻烦！这次对京东很失望！	-1
手机为什么评价那么晚呢，现在很多问题，从买过来开始说吧，买来第二天，我发现手机屏幕有瑕疵，我申请退换货，等来的结果是，京东不给理取，说不是当天签收发现的，无法进行售后处理，第三天去吃火锅时，因为是夜里，无意间发现屏幕里面也有瑕疵，一个白点，应该是坏点，结果是一样的，因为你没有第一天发现这个问题。我是冲着三星去买的，当时就怕碰到*，我现在感觉很不安全，目前手机发热特别严重，用的普通充电，根本玩不了，大家都知道820的强大，为什么我的手机现在还出现了卡，现在微信和微博两个应用返回时出现了卡顿。总结来说是一个非常不愉快的购物，而且现在掉价那么厉害，劝即将买的三思。	-1
手机也还是很漂亮的，但是呢，我买的时候看到要送保护壳，钢化膜的，还有一个自拍杆的，但收到货后什么都没有，只有一个裸机。非常伤心	-1
手机买了，等了好久才发货，千万别买，手机发烫的要命，照相都是歪的，破京东，一点都不好	-1
手机买了一个多星期 电源键 加减音量键就按不动了 跟有东西似的 现在返厂检测 都好多天了 也没个声儿 就连审核进程都不更新了 心情很是不爽 马上出差了 手机还回不来&hellip;&hellip;	-1
手机买了一个月就开不了机了，送回去维修到现在十几天了都还没维修好。质量差售后更差。	-1
手机买了一个礼拜啦，电池一天都用不了，信息转发里没有通话记录不方便！感觉外形不错！学苹果也搞ID地址，不方便！	-1
手机买了一个礼拜就降了*块钱有点坑人的感觉！三星的产品以后不会再买了！	-1
手机买了不到两个月的时候Home键磨损就有点严重，不到三个月的时候就开始掉漆了，真的很失望！ 来三星售后，人家说需要提供发票和保修卡，回去一找结果发现发票没有，保修卡上也没有加盖公章，真是一个失败的购物经历，到也一定是最后一次	-1
手机买了很久了，半个月了，哎，双11还可以优惠150的 。 图片是我开封过程，5星好评！！！ 快递也蛮快的，手机就是价格有点贵	-1
手机买了没几天，相机总是出现故障，不能用，哎	-1
手机买回来9天没摔过，就是有一两次跟钥匙放在一起，屏幕右下角裂开呢，不是摔的，还不换，建议大家不要在京东买	-1
手机买回来一星期了，不知道昨天晚上怎么回事 手机自己触碰屏幕，自动触屏，我也是醉了 没有下载第三方软件，没有磕碰到手机，就变成这样，无语了！！！！	-1
手机买来第二天就无限卡死 无法读取SIM卡 点屏幕无反应 初步检测为基带已坏. 寄到成都精美达想售后 苦等20多天，他们居然说是未出现故障，刷机处理 就瞎子都能够看见能不能正常操作。 JD与三星都是无良企业 祝早日倒闭可好。	-1
手机五分 京东负分 没有发票 我想问一下分期付款的大家有收到发票吗？	-1
手机今天下午刚到，拿到家开不开机	-1
手机会自动触屏 去三星维修中心检测也检测不出问题 本来以为是手机膜的问题 后来把膜撕了 之后又出现了自动触屏的问题 建议还是到实体店里买 就为了一个无线充电器在京东上买 后悔死了。	-1
手机使用一周，重力感应失灵，感应器y轴坐标一直停留在32767（目前s6 edge都有这个设计缺陷，基本上用了官方充电器后都会这样）。 去三星售后处理却以三包凭证没有盖章为由拒绝处理。 联系京东，说三包凭证在包装内，不可能拆包装盖章（这个我同意）。 因为机器在15天换货范围内，京东可以给换货，但必须先取走检测，再等待漫长的换货过程。 我就想说，作为消费者我特么招谁惹谁了，sim卡换成nano了，手机换货过程中我用什么，三星的售后真的太差了。	-1
手机使用三天，总体来说比较实用！相比去除了s6edge 的红外功能，讨厌+_+* 其他的都比较喜欢 待机使用电话正常，，看视频有一次闪退，直接退到自动关机重启=皿= 散热正常，	-1
手机使用了一段时间还是可以的，只是当时买的时候明明咨询了有没有快充送，客服说有才购买的，后面售后电话来居然说客服没说过有，太垃圾了！因为盒子被宝宝撕烂了，才懒得退	-1
手机侧面卡纸，还怎么防水防尘。	-1
手机信号太差又没有发票	-1
手机信号很差，玩一会就发烫的厉害	-1
手机信号非常不好，在外边有信号在屋子里就没有信号，客服强调环境问题，怎么就不能是手机信号不好的问题？！退货	-1
手机充电发热严重，待机时间偏短，正常使用中不到3分钟开始发烫，一分给快递	-1
手机充电发热很严重 ，联系客服也也一直没回复， 现在越来越怀疑京东的产品质量了	-1
手机充电口有点小磨损，不知道是不是二手机	-1
手机充电器坏了，还不到十天。客服的意思，自己去三星店修，这质量请告诉我是个例。现在的感觉，买三星就是个坑，样子货。贴膜找不到适合的，镜头夜里其实还是渣渣，噪点多到不忍直视	-1
手机充电时发烫，播放媒体有杂音，这款是不是全都是这样？	-1
手机充电那么烫 是快充的原因吗	-1
手机关机充电和使用过程中，特别烫，和京东联系，说过了15天了，只能返修，不能退换，只能拿到三星维修中心去检测下，直接和三星公司联系了，毕竟手机是三星保修1年的，我才买了不到一个月，京东只是第三方，没有办法的，他们的条款规定的，无语	-1
手机其他都可以，但充电手机就发热，电池用得快，运行内存大	-1
手机其实也就是普通版的 系统和硬件和普通版本没什么区别,觉得不怎么样	-1
手机内包装明显被拆过，标签上面加标签，二手东，很无语	-1
手机内存使用率80%以上，无论是否安装软件，很多软件总是后台自动启动，包括欲安装的，手机在不使用的情况下还是很耐用的，偶尔开下机看看短信的情况下，s两天三充，要是玩个微信，偶尔的，那要一天两充。另外系统有些卡顿，浏览个网页的时候。更多的优点等待大家发掘。	-1
手机刚买1个小时就降价，取消订单取消不了，打白条24期显示半价，结果几天后白条支付显示是全价，问客服推三阻四，把责任都推给客户，京东现在服务太差了，让我真不干相信京东了，以后还怎么购物呢？怎么让我们客户购物舒心、放心呢？没有受骗的感觉。	-1
手机刚买来两天，还没插卡，结果就出现开机花屏，无法使用	-1
手机刚刚收到，一点电也没，哎这个我忍了，自己看图片上面有个小点，屏幕上，哎太失望了，一直都有，是换的机子么，京东，本来很相信你的，这次真的让我失望了，本来想退但是太麻烦了，还是算了吧	-1
手机刚到手下载主题就卡了，电话接不了，触控也不灵敏了，心想就不用主题了，谁知道这刚用到16天，手机屏幕就闪屏了，一直跳雪花出来，打电话问京东，说手机过来15天，不退不换只有修，新手机就成烂手机了，只能说太垃圾！垃圾！垃圾！	-1
手机刚回来挺好 用了半个月就开始有杂音了 打电话或接电话都是免提 杂音也大 声音也大。头一次在京东买东西 电话是送给朋友的 真是丢人。快4千的东西上当 还得上专卖店买 那手机贴膜差的要命不到半天全都是刮痕。手机在朋友那里。要不真得拍张照片 再也不上京东买东西了。第一次也是最后一次。太差	-1
手机刚拿到，东西怎么样还不知道，快递绝对够烂	-1
手机刚拿到手，还满意，但是第二天开始就开始发烫了。	-1
手机刚拿到手拆开后就有问题，屏幕最下方内屏有1公分的半圆黑块。已经提交.换货了，如果还有问题，就真的对京东手机呵呵了。	-1
手机刚收到，卡槽就打不开！ 果断要求换货，。退到京东售后3天时间就这样过去了，再打电话咨询什么时候能到，客服是这样回答的:连先生，你好你的这个手机还需要返厂检修，需要，7到15天，！ ！！当时我听到这回答再也hou不住了，干她了一顿 ，挂完电话又给她一个好评&hellip;&hellip;京东，售后服务太让鄙人失望了&hellip;&hellip;	-1
手机刚收到开机屏显有两黑点，质量不好	-1
手机刚用了两个星期就不行了，反应慢，卡的要死，上当了，什么破手机	-1
手机刚用就开始发烫还是在不充电的情况下 只要在用 一直就是发烫的状态 用了两天充电器也坏了 充着电没玩自己就坏了	-1
手机到了，发现摄像头有一道裂痕，要去换货，来取货是很快，结果到了售后9天多了还是在拆包检测，在线客服也说不出还要多久能检测好。我现在用别人的手机，自己买的手机10天多了还用不了。	-1
手机到了，用着不错，快递也很快，但是发货时间拖的太长必须差评	-1
手机到了才几天，始终当爹供着，正常使用中突然花屏。有说不能用熄屏显示功能的，有说不能升级新官方系统的，还有说不能用无线充电的，看来要当爷爷供着才行。京东售后速度太慢，报换机第2天就上门取件并显示完成检测等待京东处理，现在是第9天了，售后记录还是第2天的未更新，是三星坏的太多了换不急还是要把机子留着卖出去？？这种大几率问题能不能快速解决，毕竟手机不在非常不方便。你们要是重视消费者的利益，三星会拖着不办，是准备拖过15天还是拖到2年诉讼时效满，不如给个痛快话，工商投诉、法院诉讼我可以选择的来。到时候就不是换机的问题了，我的数据信息和照片视频以及给我的间接损失，你们作为销售者先赔了，然后随便你和三星怎么分担，相信你们的竞争对手很需要这样的案例，可好？	-1
手机到了没几天 开机键就软了，不过不影响使用	-1
手机到手10天出现5次扬声器没音，放到耳朵附近滋滋的声音。误触情况多有发生，体验一般	-1
手机到手后一个礼拜开始出现屏幕有一道一道黑色的线 紧接着手机屏幕亮不了 之后手机发生点小磕碰 左下方留有痕迹，有图为证 申请京东换货之后 等了十多天京东没有给做任何处理就退了回来 理由就是有磕碰。打售后电话 让我去售后实体店去看看 售后将左下方磕碰为理由拒绝维修 继续打售后电话 售后让我重新添加返修单 填完之后就没再审核了，就这么托着。售后服务质量太差。 话说回来 这么点小磕碰屏幕就给磕坏了 这质量得多差啊	-1
手机到手没到一个月就出现问题了，短信有时发不出，总出现自动关机现象，接听电话也有影响，女朋友很不高兴	-1
手机到手第一天，无法充电，联系客服，让我去三星售后检测，几经奔波终于检测了是手机充电线的问题，联系客服又让我在售后店解决，地方又比较小，店里没有原厂充电线，三星售后店的人帮我申请重新发一根线给我，到现在十天了还没有到，只能用以前三星的充电线用着，电池不怎么耐用，也不知道是什么的问题。建议我们这种偏远县城的人买的话慎重，不过估计也没几个人会像我这么倒霉。以后很难再考虑三星的产品了。	-1
手机到货很快，周末下单，周一就到了。不过手机给我第一印象就不好，我还没有拿到手机，于是登陆京东看看手机到哪了，登陆进去显示已经收货了，吓了我一跳。找到快递员，快递员说已经送去了，不过快递员送到的时候没有给我打电话，还要我打电话去问，真的太不负责任了，还好接电话的时候态度比较好。刚刚把手机打开玩一会，手机就死机了，手机卡都没有上，就死机了，真是无语了	-1
手机到货第一天就出问题，总是反复黑屏，不知道有没有遇到和我一样问题的朋友？！后来几天又出现这种状况，还在使用观察~不建议购买，不如苹果好	-1
手机包装是拆开过的，据卖家说是10%抽检，你也不看看有多少买家反映手机包装是拆开过的，恐怕是10%不拆吧？新机没有出厂贴膜？请解释一下。我有意试用到自然付款才来评价，机器目前没问题，祈祷以后也没问题吧。送了一堆垃圾全甩了，还不如直接给便宜几十块钱好了。第二次在这买手机，但这次确实没有上次买HTC M8满意。	-1
手机发烫，，，，，，，，，，，。	-1
手机发烫厉害的很。买了第二天降200。	-1
手机发烫比较严重，已申请退货！	-1
手机发热，玩游戏卡的要死，先不说这质量，京东这降价策略太坑了吧？刚买就降价600，巨坑	-1
手机发热，现在都有点卡了，不想多说	-1
手机发热。电池不耐用！	-1
手机发热严重，刚买的就这样？！直接烫手！！！！先用两天看看，不行就退货	-1
手机发热严重，屏幕指纹痕迹太多	-1
手机发热严重，玩游戏闪退。商家太黑心刚买完第二天就多送2个赠品，找客服不回信息，非常伤心	-1
手机发热严重，还容易摔。从袋里滑出来外屏和后盖就碎了	-1
手机发热严重以至于自动关机，且不能再开机。由于温度过高造成手机背板的金色电镀层起泡。自动关机后整机仍然不正常发热且持续时间达到将近4个小时人手触摸手机不正常发热温度最高部位是在手机正面右上角。（中国人的京东必须替中国消费者向韩国三星讨回公道，必须换机乃至退货。）4月28号收到手机至5月26号出现手机不正常过热以至于手机自动关机，不正常过热持续造成手机背板起泡。希望京东引起重视，相信是手机设计缺陷，接下来这一型号手机很有可能陆续出现类似问题。有购买三星S6 edge 的朋友还是小心为妙，购买不超过15天的刚快退货，有意愿要购买的朋友还是观望吧，不要再变成无辜的三星小白鼠	-1
手机发热很严重，电池很不赖用	-1
手机发热很厉害，卡顿也比较多，建议大家别升级系统其他的还好	-1
手机发热快，很烫，跟小米4没区别，还有就是续航不好，耗电快，指纹不灵敏，经常要按第二次，防水没有试不知道好不好，还有就是需要剪卡，费劲，相机没有想象的好，一般般信号差，虽然4g+的网络特别特别快，能打到10mb/s的程度，但信号差有卵用，而且货到付款之后竟然没发现没发票，没发票，没发票这个是差评的主要原因	-1
手机发货速度太慢，说是地区没货，还不是从北京发过来的，送的垃圾手机膜直接扔垃圾桶，手机发烫，用点速度还行，无线座充还没有用，	-1
手机可以，就是赠品真是坑的不行 下单前看着很多 无线冲 手环什么的 下完单一看无线冲 手环没有了 变成了个充电宝 呵呵，客服一句赠品随机打发了 看了很多评价都没有这2样赠品 那你是随给谁了 没有就不要贴出来耍猴呢，好好的购物体验全搞废了	-1
手机可以，货到付款不让拆封验机，货到付款的意义在哪	-1
手机右下角凹陷很厉害，还不给换。相机发黄，不如某些国产机。京东售后很差，不值得买！！！！	-1
手机各个方面都很好。但是！我还是要把差评给京东！这是我网购这么多年来体验最差的一次！东京在我心中的信誉度直线下滑	-1
手机各种问题！	-1
手机后摄像头里面有一个颗粒物杂质，导致拍照时成像固定位置会有黑色的点！强烈要求换手机！其他试过了没有问题！但是就是这一个问题就很让人恶心了	-1
手机后盖上有一小点掉漆，来回处理 还要什么鉴定，太麻烦了，这次花了那么多大洋，心里总是有点不爽	-1
手机后置摄像头里面居然有灰尘，而且很大很明显！除此之外手机还算不错，严格怀疑这是二手货！	-1
手机响应速度确实很快。拍照的效果也好。就是寿命太短不稳定。才用了十多天就黑屏了。精密设备处故障这个可以理解。但是三星官网客400服指定的的武汉黄陂的手机维修店服务态度太差。命名屏幕没有破损非要把责任怪罪到我的头上。让我出1500元换屏幕。 真是气死我也。 三星的维修站服务真是太不讲道理了。 有一种 有理无处说的痛苦啊。质量如果有问题我可以理解。但是服务差 不为客户考虑 这是很让人气愤的事情。	-1
手机售后服务态度很差，赠品也没送齐，还差一个移动电源，联系多次售后，无果而终。	-1
手机基本还满意！但是综合我真得给差评！第一个原因是Home键左边有一点卡键，问题可以忍，不可以忍的换货时间和我出门时间冲突，我必须选择不换！第二个原因是，第二天就遇到了充电烫手的问题！第三个原因，买完就出了券！有点闹啊！所以差评	-1
手机外观不错 手机用了几天 背部玻璃出现裂纹 保证没有摔过 打电话给客服 客服叫我打给维修站 我说明情况 维修人员态度强势说玻璃破了 不能保修 不算质量问题 哎 将就着用吧 希望过几天裂纹别扩散了	-1
手机外观没得说，但是次款手机发热而且经常关机，发票都不开，而且还要会员自行打印，最主要的是京东现在是越来越垃圾，不管是服务还是商品的质量，且京东现在水货二手翻新假货特别多，只要有钱都可以在京东平台开店，无良上家，如果评分直接就是5个XX，建议	-1
手机外观漂亮！但是我用一个星期就死机、屏幕没反应，系统漰溃！返回京东售后，真让人心痛，**手机就是这样吗！还有京东售后人员真不知怎么说他们，我把手机返回京东售后前一刻还试过手机屏幕还是没反应，但是一到售后京东人员打电话就说手机没问题重装系统就可以！几千块手机用几天就要重装系统真气愤！对于售后人员的话我真是一肚子气，真气愤！	-1
手机外观设计太垃圾，手机发热，系统不行，想着退货，屏幕失真，有污点，，跟苹果比三星就想小屁孩一样，根本不会做手机，垃圾！	-1
手机太垃圾，经常卡机，反应迟钝，点半天不动，还不如一千元的手机，总之烂烂烂烂烂烂&hellip;	-1
手机太烂了，没法上网	-1
手机太烫了发烫特别厉害 一点都不好 手机电量不行	-1
手机好，这次京东送货比蜗牛还慢，24日的货已经到服务站，结果等到26日下午4点半才送来。京东送货的口号：真臭	-1
手机好，配送也快，当时抢购时用上了24期免息款和打1000白条优惠50元，今天突然发现订单只算后者，分期居然要收分期费，而让24期免息券白白过期，让人很不舒服。 买手机还买了个教训	-1
手机好像是水货，信号太差了，最伤心的一次购物，老婆都把我骂死了	-1
手机好评，京东差评。本来想买银色的，结果我要买的时候价格恢复，我买了金色，**又降价，这是跟我过不去？	-1
手机好评。京东差评！5288买的，4天，降了400，退差价吗？送的那些东西根本没用	-1
手机就那样，曲屏是买点，发热和耗电是槽点 给一星是京东的无耻： 1.首发大礼包4里面包含无线充电器，并且4月17日-5月2日有效，这两天页面一直变来变去，昨天还改成三星插卡保护套，本人买的时候，除了充电宝、OTG、膜、自拍杆别的都没有，跟客服交涉，说反映到专员那里，妈D刚才一个短信就把咱打发了，赠品你们都留着发财吧，哥不要了 2、当日下单时，写的第二天就能到，结果拍下来以后手机膜缺货，显示一直在配货，哥们把订单分开了才收到的手机，JD你是多能忽悠人！ 3、最为讽刺的是，首发大礼包5居然是JD的红箱子，哥们的订单包含了礼包5，却没有礼包4，看来JD太有自由选择的权利了；	-1
手机屏幕不好贴膜 贴的高清膜 太次 还要找专业的贴 手机死机 太热 最可气的是 买了没多久 降价800 京东不管 差价不给补 以后最好还是远离京东	-1
手机屏幕右上角翘起，比左边要高，按下去很送！差评，果断换货。	-1
手机屏幕大，看你懂得的电影很好	-1
手机屏幕太差了，刚买两天就碎屏了。心碎①地	-1
手机屏幕左侧出现一条灰线，正在联系售后。没联系上。	-1
手机屏幕有时一散一散的。用起来影响是不大，但是这么贵的东西还是到实体店试了后再买。	-1
手机屏幕确实很不错，买了送人的 如果你不是第二个周3g，4g坏了 即使不用也发烫 第13天你不停的提示底座已接入，震动几下 第15天好吧，算你狠，下班路上急用的时候你就坏了，屏幕亮着，人家一直按关机键你还是死不瞑目啊。 所以我只能愤怒的给你差评，差评，差评！！！	-1
手机屏幕触动效果不好。经常漏打字。找了售后换货居然告诉我上边有缺口。肉眼找了半天真心找不到。才用了三天，我只想说呵呵呵呵	-1
手机左上角玻璃屏幕脱胶.翘屏....做工质量缺陷.正在返厂中.希望更换新的..	-1
手机已经收到了，货物跋山涉水很远，没有丝毫的破损，快递给力，十足的正品。蓝色的机身新颖，毫无违和感，手感细腻。对于几日来上机的体验也颇有心得，由官网介绍可知S6有许多无可替代的优点，对此赞同，不过还是来谈谈手机的体验的实际情况（略微不足处）单纯地打开几次网页或是不清理内存空间手机会变得卡顿，，看新闻时翻网页向下滑动会略显卡顿，，，个人认为最大的不足处是手机接收WIFE速度忒慢了，让人无语，不过还是比较新颖，单凭美感方面超过一切，综合来看给个满分。	-1
手机帅，差评给京东，今天还送赠品，失望	-1
手机应该没问题 就是京东系统是不是崩溃了 各种不靠谱 1.显示下单后显示正在采购不能发货 一款虚拟产品（延保一年）没货 拆分订单2次 显示成功 实际没有成功 客服让重新下单 第2单和之前的一样 一天过去了； 2.客服说采购需要等2-20个工作日，这是最扯淡的回答，一款虚拟产品不能拆分还需要等如此之久采购不到不能发货； 3.自己在网上查，发现可以第三次 重新下单（此时说延保服务活动结束后生效） 终于成功了，一天又过去了； 4.终于收到货，可是没有发票 电子发票需要1-2个工作日在网上下载，于是2日过去了； 5.结果是：！！！！&ldquo;您好，很抱歉给您带来的不便，国税总局对电子发票系统进行升级，华北/华东地区电子发票换开纸质发票时效出现延迟，还请您谅解，待系统恢复后，麻烦您在咨询在线客服核实修改呢，还请您耐心等待，谢谢！&rdquo; 无限期等，在京东最差的一次购物，还有就是京东客服各…	-1
手机开机关机键 陷进去了 卡住了 使用不灵，这才没用一个月呢！！怎么回事！找客服都找不到！ 找客服，全都是繁忙！	-1
手机待机太耗电了。还没收到货就又促销降价了，京东太坑了！严重差评。	-1
手机很不错，京东服务一点都不行，特别是网上客服。	-1
手机很喜欢，但是必须一星。就是没有0星。8号交定金给我18号发的货。16号推荐我退款从下。发北京，在让，朋友给我邮来。刚退款，山东就有货了，又重下单子。最，恶心的是货还没到呢，*又送赠品了。又给拍立得了。客服还不给补偿。呵呵。发完评论就卸载。祝你早日破产。	-1
手机很好，但是京东价格比别的电商高，而且领了券之后偷改后台造成无法抵券，直接造成购机成本增加，另外赠品一堆没用的，不如一个充电板，自己又单独购买了一个充电板增加了购机成本，总的来看在这里买很不划算。现在绿色也送充电板了你们去买吧我是对京东失望了。	-1
手机很好，但是京东服务第一次这么差，23号定的时候明明有货，付完钱第二天一看没货足足等了一个星期，等一个星期也就算了，我早定了一个星期送的东西还没现在的好，现在送无线充电器，我早定的等了一个星期反而只有一个垃圾收集壳，和一份意外险.真是火大，以后再也不会再京东上买收集了，真是坑，还不如去实体店买呢！	-1
手机很好，各方面都不错，就是贴膜比较坑人 感觉京东的服务简直太差了，等了那么长时间不说，联系客服，一问三不知，还有干脆说说话玩消失的，能负责任点麼，再说说搞的那个白条免息的活动，提交订单的时候0手续费啊，后来查看白条硬生生的三百多服务费，逗我玩呢麼，一次次的给客服打电话，好不容易接通，又是解决不了，要稍后专业的人回给我，第一次说三个工作日会减掉的，过了好多天多的钱还摆在那，又是一次又一次的联系，最后来了个工作人员通知我说后台没显示我参加免息活动，真是醉了，无语了都，把人当傻子玩呢	-1
手机很好，差评是给京东服务的。	-1
手机很好，用着也挺舒服的，之前买的时候以为是有送碎屏的，所以没在意。没想到今天一客服打电话来推销碎屏险，我说不买还不乐意，意思是碎屏了你就等着自己出1500到2000块钱修吧，这是咒我的屏会碎呢。	-1
手机很好。唯一的需要吐槽的是你们的霸王条款。请问你们这个货到付款和在线自付有什么区别？货到付款还不能拆最外面的包装清点商品。我觉得这个要求是最基本的吧。可惜你们的快递员号称什么公司规定，说不让拆。必须付款后才能让拆清点。我想请问下，我都不是拆商品的原包装，这个都不行？服务太差！霸王条款！！	-1
手机很好用，但是对于京东的营销手段感到恶心，本来说好的赠品，一直再改，最后买了个最次的赠品，直接粉转黑。。。呵呵	-1
手机很好看，性能也很不错。就是安卓6.0很多软件不适配，例如京东金融打开就会闪退。最让我恼火的是，我买的时候明明勾选了12期免息，居然在结算的时候收了我700块钱的分期服务费，真是*了。	-1
手机很差，我都怀疑是不是正品，很卡反应很慢，后面的视频又是歪的没有安装正中，可能是不合格的产品	-1
手机很漂亮 可惜拿来 开机点不动。最后只好退货处理	-1
手机很漂亮，但是充电口附近有划痕，和客服怎么沟通也不给退，差劲。	-1
手机很漂亮，但是屏幕有坏点，在京东买了那么多东西，第一次收到有问题的产品，已联系退换，希望尽早给予回复。	-1
手机很漂亮，值得购买。京东的预定还是算了吧会后悔的	-1
手机很漂亮，唯一不好的地方就是手机充电口有点毛糙，不知道是做工问题，还是别人用过，怀疑怀疑。明天去售后问问。	-1
手机很漂亮，很有质感。性能很强大，玩游戏什么的都很流畅。不过这些可能是因为骁龙820。三星系统毛病很多，系统里面很多没用的功能占用内存。主题不能混搭，一次换就是一套，还都很丑。字体全部是收费的，花6块钱才能下一个，发现不合适就郁闷了。拍照特别差！我是指拍人~包括自拍，前后摄像头畸变非常严重~自带的美颜非常不自然~希望后期系统更新能有所改善~拍景还是可以的~然后就是膜不好买，市面上基本就没有完美贴合的膜。钢化膜就不用想了，一百多一张，不是吸附的，是粘胶的。	-1
手机很漂亮但是摄像头拍照有个黑点，三星的质量怎么变成这样了	-1
手机慢不好	-1
手机我就不说什么，送的都是些什么东西？膜加套要5块钱么？干脆不送好不好。这个评价仅针对京东营销。手机没有期望中那么好。双曲屏加上三星标志性后背，真的很不搭。这个颜色也显得很low	-1
手机我真太伤心啦 天天出问题！售后说检测没问题 唉 伤心	-1
手机手感不错~发货也特别快~但是冲京东的服务我给差评~ 缺点如下: 1、三星官方说预约购买都送透明壳、贴膜、无线充电器的，*、官网、都送，为什么京东的s7就不送？被你们自己吃了么？！ 2、京东欺诈消费者，预约界面赠品是有手环的，购买后发现变成了sd卡。 3、手机发热喜人，以后谁再嘲笑小米是暖手宝我跟他急，明明是三星s7!冬天妈妈再也不用担心我手冷了！！！	-1
手机才买了一个星期，今天发现无缘无故后盖裂了，之前刚买的手机后壳，后壳好好的，里面手机盖坏了，肯定没有摔也没有磕碰，可能是夏天进出空调房，受热不均造成的。申请售后说不在保修范围，要出钱维修，这不是坑消费者吗？	-1
手机才用了一个多月就这样，老是死机自动关机，软件自动停止，第一次售后说系统的问题刷下机，刷了机还是死机自动关机同样的问题，又去售后说检测维修，这明显就是质量问题，才用了一个月就修，那手机还有个屁用啊，三星这品质也是服了	-1
手机拿到第2天发现打电话和接听对方都听不见声音 必须开扬声器才能使用	-1
手机拿到第二天就点了换货屏幕里有异物！都一星期了还没拿到这服务，苹果维修需要超过5天的都提供备机，京东和三星的服务果然差	-1
手机按键旁边玻璃屏里面有一个黑点 像是划过的。	-1
手机挺好&hellip;无线充迟迟不到&hellip;只能配给个差评&hellip;伤不起&hellip;有货卖没货发赠品	-1
手机掉价可以容忍。手机收到就有豁子。你tm几个意思。	-1
手机提示未在网络上注册，找个客服都找不到。售后太差了!!!!!怀疑手机有问题！！！！	-1
手机插两张sim卡 其中的电信卡不能打电话 手机连电话都不能打还叫手机吗？	-1
手机操作不方便，不好用。	-1
手机操作起来还不错，按键手感很一般，再就是发热温度太高，建议冬天送女孩用！拆封过让人太不舒服了！！！为什么别的店都不拆封，就你家拆封！由于前面用的手机突然坏了，着急用手机（物流给力，第二天一早送到），抱着丝丝侥幸心理，不期望像店家说的只会有百分之十的开封，自己也许会像个别买家那么幸运，机器应该不会有问题，我买了，但是，为什么上工信部网站查不到有注册呢？回复说新出的有的没注册上，让去三星售后，我就想说，买个手机，怎么会这么多事事！送的智能壳，让我迷茫，哪里智能了？	-1
手机收到不知道三星s7 G9300听筒下方为什么没有三星的英文商标	-1
手机收到以后是开封过的，这让我很不高兴，机子也被开机过，没有新机子开机以后的设置向导，最坑人的是上面写的是送智能开窗皮套，结果收到的是普通皮套，问客服客服说是随机发的，就算是随机，也不能偷换概念吧，一个是智能的，一个是普通的。手机收到以后浮动信息点不进去，恢复了一次出厂后才可以，费电相当严重，完全是在漏电。这个可能是正常的。发热严重。很怀疑。这是我用了两天的感受，告诉大家。	-1
手机收到就有磨痕，*果然名不虚传，联系客服时已经分不清是自己弄得还是本来就有的，送了5元券让买个套，呵呵	-1
手机收到才用一天发现哪都有问题，微信声音时大时小，360还弄死的不能卸载，第二想换个铃声居然显示在通话中不能播放，然后拿去刷机从装系统，用了两天朋友发个红包点开就黑屏，试了很多次都黑屏，还卡死一次，更郁闷的是，连个充电线都不给我拿跟好的，冲个电一闪一闪的，充电宝的线头还歪的，之前所以没评论觉得从装系统能用就算了，越用越觉得五千多块钱不值，真烦，给我老婆的生日居然这么垃圾，一颗心都多，眼睛瞎了才买这手机，弄得我老婆说我买的水货，跟我吵架吵了三天，我实在是忍不住不来差评了，什么破手机	-1
手机收到是拆过封的，人为的有刀片划过痕迹，我问客服说有百分之10要开开抽检，用你们检么！？你们干哈的你们开封，你看看多少人评论，收到的都是开过封的，手机出厂不检完包装么，你们自己开封把数据线换了不知道么，。？而且我打开检查时候发现手机边有划痕，手机外包的膜还在上面，里面划痕怎么解释，一直让我开快递证明，你去问问顺丰公司有这证明么，你们发货之前给我拆了封，你说抽检，用尼拆啊，用你销售商抽检么？？划了没看到么，瞎啊！谁退回去的你们就销售给我们，手机新的正品我承认，手机不错！你们拆了，边框有磕碰的点，你们拆的你们不承认，谁磕碰的谁狗养的！纯属无赖，送的破革壳没地摊5块钱的好。您们自己体会！垃圾店，拆了坏了叫抽检，有毛病让开根本就没有的证明！！！垃圾中垃圾，随时电话骚扰我，我等着！看聊天，赠品不是白送的，手机是真的，别的不敢保证，自己体会，基本所有买家手机盒都被拆过，你们检查什么?_?	-1
手机收到用了两天，触屏效果不是很好，反应有点迟钝！手机很容易发烫！	-1
手机收到盒子摔坏了！里面手机没事！但是手机严重发热！什么意思？服务态度也不行！京东越来越牛了！	-1
手机无缘无故发烫，卡，恢复出厂设置显示账户无效，用不了，哎	-1
手机是5月的，库存4个月，拆开包装后发现卡托上有个针鼻大的小坑，右边框有一条两厘米的点带装状的痕迹，从大到小，瞎子都能看出来是机器打磨不均衡留下的，怀疑是返修机，要退货，售后看过图片说边框上的痕迹得鉴定，不能7天无理由退货，我三四年的钻石会员，不可能干磕了你手机还要去退货那种没屁眼的事儿，告诫大家，以后京东买手机一定要当着送货员的面打开，以免二手东耍赖。	-1
手机是上年5月生产的 买回来一点电都没有 说明放了很长时间了 什么都不玩 待机两小时费40%的电	-1
手机是不错，但是你麻痹送的东西太烂了 扣你一星，自拍杆是弯的，送的贴膜你麻痹上宽下窄，充电宝还没电 垃圾京东早知道在实体店买了，	-1
手机是不错，但是预订的时候是有礼品的，等到京东发货的时候，活动取消了，然后礼品也就没有了。不明白JD那么大个公司耍这种小技俩。5号预订到11号发货等了那么久，竟然礼品也没有了，我只能对京东呵呵了	-1
手机是不错的，但是价格，靠，三星真是有问题的，7月30号前*，7月31号降到*，8月10号降到*什么公司，定价乱七八糟，按这降价速度，3个月不到肯定降到*了，后悔买了！！	-1
手机是别人用过的，收到手机有好多陌生的通话记录！电话本里存储了陌生人的电话！第一次在京东上买手机却买了个二手的好失望啊！想购买的朋友要谨慎啊！最好去手机店买！以后不会再京东上买东西了！！！	-1
手机是好手机，客服的服务意识就不是该有的课，问为啥没送我无线充电一开始说这是我买手机后的活动的，后来我一看不对啊之前买的朋友也有送的啊，客服又改口说这个活动一阵一阵的，这解释我也是醉了。	-1
手机是好手机，没话说。但是京东的服务烂到透顶！我想问下你们这次活动的策划是不是nc？预定的人等死不发货，结果13号北京和广东直接现货购买。我们交定金的时候你们为什么不配货？预定没有任何优惠！还要和别人现货购买的同一时间发货，人家退货全额退款，预定的人想退货？不好意思定金不退！欺诈消费者，店大压客。现在更牛逼了，买手机可以用券，还送更多赠品，变相降了次价。原来现货购买更划算啊！预定的人都被京东当成了猴耍了一次又一次！我只想说，愿意在你京东预定的人都算是你们比较忠实的用户了，然而你们是怎么做的？你们将会丢失这批用户。京东，我看你还能在这条邪路走多久！	-1
手机是好手机，没遇见别人遇到的问题，好用的，只是感觉系统不太好，不是很流畅，需要加强优化。17号下一个订单一台手机，让我付了两笔钱，银行的当天审核完退，白条分期的，我打了10几个电话，第二天才给我退，害我只能分12期。在京东买东西最近就没顺心过，每次买都是一肚子火，之前下个订单我杭州的给我派送到宁波。以后能不上京东就不上京东买东西，买必差评。	-1
手机是好手机，这个差评是给和谐中国梦的，没有google play ，你要么去官网一个一个找apk，要么就得忍受第三方垃圾市场的各种垃圾广告还有捆绑，实在受不了了，而且你根本不知道国行系统被zf留没留后门，你怎么解，root了又没保修，sumsung pay倒是不太在意，真的烦死了，我说zf你有点自信好吗？一个国外公司的一个手机应用市场能把你搞垮吗？自己瞧不起自己！	-1
手机是好用的没话说，京东客服让人伤心，一而再再而三的忽悠到货时间，不停变更，问怎么回事，就说联系谁谁谁，再等两天给答复。总共等了十天。中途忽悠三次，等待回复两次。你要是第一次直接告诉我要等个十天我也就认了，你别给我胡乱承诺啊，我问你这次是确定了吗，你说确定了，然后又给我变卦，第一次对京东失望了。	-1
手机是好看，刚用今天，送话器就坏了，现在还在换货中	-1
手机是帮朋友买的 还不错 已经用了好多天了 没什么问题 就是那钢化膜太坑了 才只有半个屏幕 我想说设计师是在逗我们玩吗？	-1
手机是很漂亮，物流送货也很快，在京东买了这么久东西，但这次真心觉得被坑了。双十一高活动价*，我今天去家电大卖场也是卖*，而且还可以旧手机折价，京东，能给我们这些老顾客一个交代吗？	-1
手机是挺牛B的，就是ta ma d 没过几天就降价了，还不给保价，特别SB。	-1
手机是终于收到了,手机刚上市就订的铂光金,谁知道手机来了居然有问题,果断退了,怕ershou手给我再翻新的机子,不敢下黑色,白色,金色,只好等了这个绿色,说好的21号发货,好不容易等了半个月到货了,发货京东现在下单居然可以用240的优惠券,而且其它颜色还送无线充电器,足足的500来块的差价,京东一句说法也没有	-1
手机是翻新机，这点可以确定，不过算了	-1
手机暂时没有什么问题，但是现在充电问题多多，有线充电充满要4个小时，无线更要7个小时，反映后又不能去一个明确的方案，还不够半个月就出毛病了！买的时候5688现在都降价了500块钱了，都不能补发一个客户说的有线原装充电器！	-1
手机暂时没问题，但必须给物流差评。昨天下午两点多买的，选的送货时间是晚上七点到十点。我在家一直等。等到12点了都还没来，给客服打电话，客服说催下，结果。客服不知道催没催没有给我回电。物流那里第二天才送到。前一天不能送到也不给我打电话说一声，害我第二天上班都跑回来收货。特别生气！！！差评！	-1
手机有划痕，怀疑是柜台展示机？询问客服未回复，大家购买需要注意	-1
手机有没有问题暂且不说，就是拖了一个多星期才发货这事就极度让人不爽，客服解释为&ldquo;预约&rdquo;，但没人给我解释都公开发售的东西还&ldquo;预约&rdquo;个什么鬼！无货就是无货，这种强词夺理式的解释真让人觉得恶心。晚了就晚了，屁说法都没有，就好像我们买了你们东西，活该！谁让我手贱买你们的东西一样！别了京东，从此不再来京东买任何东西。	-1
手机有缺陷 还不给换货 特别不愉快的一次购物	-1
手机有问题，申请换货！晚上下的申请，承诺次日两点之前出审核结果，现在都四点半了任然处在审核中。我想问，你京东既然做不到这么快，为何要承诺？！这不欺骗消费者么？！很失望的一次购物，愧对钻石会员。效率太低	-1
手机有问题。。。我也是醉了。。。	-1
手机本身不错卡顿不灵敏的小瑕疵可以忽略。最想说的是京东白条欺骗坑了多少人，说好白条12期免息但是白白多出三百六的手续费！总价花了6000买这个手机。赠品手机壳自拍杆也不给！最差的一次购物体验。等还好白条发誓从今以后不在京东买任何东西！	-1
手机本身很好。但是，本来下单的时候说的白条12期免息，结果支付完了发现产生了利息，问了客服也说的莫名其妙。很无语。	-1
手机样子一般，比较费电！当天十一点前下单没有当日送达，客服也没有通知我，客服回复问题很慢，客户体验下降！希望提高客户体验！	-1
手机样式速度都很好。就是发烫速度更快一直很热。我两个手机都是三星的，看手机就没那么烫手，这个刚买的却很烫玩一会就不能玩了，这手机是不是有问题，或者不是行货？	-1
手机正面没有logo真心不好看。发烫也很严重，无解&hellip;&hellip;不知道是不是个别问题，用了两个月了。客服可以解决一下发烫问题吗？	-1
手机没什么问题，为了一个赠品搞得很不开心 刚开始问客服说赠品不是他们送的，后面又说赠品已经送完了，为了一个赠品连实话都不敢说了 真是醉了	-1
手机没什么问题，挺个性。但是我预定买的，延迟发货不说，什么赠品没有，618了，没卖完，送一堆赠品了，太气人了。很不爽的一次购物，有一种被人坑了的感觉。	-1
手机没到两天就有点掉漆就没在意。。慢慢越掉越多了。。今天打电话给售后。。唉。。。不给换。。5688就买就质量，就买这样的服务。。。后者的同志要打醒十二分精神考虑了。。。	-1
手机没啥说的 就是快递··买了半个月才给送过来·而且说好的发票也没给我送过来。	-1
手机没得说，就是居然不对误触做优化！还有5 6 8 8 买回来，不到2周，5 6 8 8-6 0 0 -3 0 0 ，卧槽现在4 7 8 8 ，以后再也不买三星了。。。当之无愧跳水王！！！	-1
手机没得说，就是居然不对误触做优化！还有5 6 8 8 买回来，不到2周，5 6 8 8-6 0 0 -3 0 0 ，卧槽现在4 7 8 8 ，以后再也不买三星了。。。当之无愧跳水王！！！	-1
手机没得说，说说京东的配送，也不问家里有人没人，把手机丢在门口就走，就这还不打电话说一下，要不是自己惦记着主动打电话问，还不知道手机在走廊里！急急忙忙跑回来拿回家！下次买贵东西，地址改个没监控的，只要不当面给我，我就说没收到，赔死你！不负责任！	-1
手机没收到的时候赠品就换了，拍的时候是现货结果一周才到货，客服差评，关于京东客服问题真应该学学马云家，看看人家。手机一般，没有水果好用	-1
手机没有发票，想给什么好评，还要我来联系你啊！分期也要给发票啊，难道不用保修呢。	-1
手机没有想象中的那么好，用有点卡，以为是水货哪	-1
手机没问题，但是京东欺诈消费者，预定不给备货等补款了才去采货，还没有那些不预定的人发货快，呵呵，真的是店大欺客下次不会来了！！！	-1
手机没问题，但是我对京东有一次失望了。东西还没寄到，就已经降价了，申请价格保护，还说有赠品，不能价保，不是几个钱的事，是你们做事的态度。恶心	-1
手机没问题。但京东说要赠送无线充电器没送。	-1
手机满分，买了十天降价800这个只能给一分了，可以说，赠品真是可有可无么	-1
手机烧的厉害，电池没电快的让人无法相信，随便来个电话还没有接就已经没了3%的电了，简直无法形容！	-1
手机烫的很严重，不玩，充电都烫，其他待试用	-1
手机物流很慢，我是十七号下的单，到二十号还没有给我发货，到现在块一个月了，我的赠品还没有收到。再说说手机，还行，不过我要冰雪奇缘游戏~这只是个小游戏，手机烫的要死，待电也不行，还有，我十七号下的单，说有碎屏险，不过有个手机发票以外，也没我什么说明的东西，说我有这个险的东西了。	-1
手机特别耗电 买完就掉了100 我一次买了两个找客服他说只能赔20 我就呵呵了你们京东就这么干吧越来越垃圾	-1
手机玩两个小时就非常烫手了，看来六千多的手机一样逃不掉发热的症状。	-1
手机用了一个多星期，颜值没得说，拍照强悍，外放可以，玩游戏会发热，充电蛮快，电源键微微松动，偶尔有卡顿估计是APP优化不到位。之所以给一星，是京东居然没给开发票，想逃税没门。	-1
手机用了不到1个礼拜、手机只要一用前置摄像头就弹出警告、手机服务出现异常、需要重新启动相机、手机重启、相机重启都没用、用后置摄像头一切正常、目前手机返修申请换货ing！！！	-1
手机用了不到一个月死机了四次，这是真机吗？	-1
手机用了不到三个月屏幕就经常闪！太差了！	-1
手机用了不到半个月就出问题，到第16天突然彻底黑屏，所有信息都无法取出，无法显示；送修时一再交待抓紧时间处理（因所有信息都在手机里），送给京东维修又有半个月了，还没回信，也没见手机，严重影响个人工作（没办法只能又买了一台国产OPPOR9备用）。打客服电话也没回音，6.18日花5千多买的三星最新版手机整个一个月就是闹心，建议看到的人不要再买，产品质量和服务都极度差。是必须要打分才能提交，否则只能是0分。	-1
手机用了两个多月就突然花屏成这样了，根本操作不了，没摔过没蹭过，一直挺爱惜的。还能说什么	-1
手机用了两个星期不到，已打不出电话，总要重启才行打电话，郁闷死了，一直用三星的手机，没试过这样。	-1
手机用了几天，系统就出现卡顿现象，感觉这手机就值1000-2000这个价，，竟然连正规发票都没有，说的7天无理由退货也不能退，以各种理由搪塞，第一次感觉在京东买东西被坑。建议大家买这手机慎重考虑一下。	-1
手机用了几天总体上来说还是满意，但是京东这次搞的预定我也真是醉了！第一批预定的说好的13号发货结果到了13号，显示还在供应商采购。我也真是无语了，还好我是12号交的订金最无语的是7号就交了618的那些用户，足足让别人等了差不多10天。最主要的是京东把我们交了订金的用户系统显示是＂定金＂玩数字游戏？如果是定金的话按照＂合同法＂没在13号发货的就属于违约，是应该双倍赔付的，因为我们交的是＂定金＂这事是定下来的，不是预订的订金。把我们这2000多名预订的用户坑出翔了，最后没准时发货连一句抱歉都没？那有这么做生意的？如果是实体店你想想2000多人要到你们那里讨个说法是什么样子？	-1
手机用了半个月评价，真的太垃圾了，贪图分期付款在京东买，用了半个月屏幕出现一些坏点，而且价格比实体店贵，还有现在出现好几次死机问题连个客服都没有我该找谁？	-1
手机用了有一个月 后盖中间裂了一条缝 有1厘米多点 售后表示不管是不是质量问题 想修 自费 京东表示如果不影响使用 建议不修 我只想说 手机后盖是玻璃的 要是我撞得 不可能只有一条竖着的裂缝吧 还是在中间	-1
手机用了第10天屏幕突然不显示了，黑屏，手机还在工作，拿去售后检测说屏坏了，出报告换机，我想说这质量也太差了点，6K买个手机，用了10天不到就出问题。另外就是京东现在的服务也越来越差了，预约了9：00到15：00上门取返修件，一直到17：00了才去，还是我打电话给客服催了一次。换机估计要1周，在京东买了好多年东西，现在真的是越做越差。	-1
手机用了还不到两月，今晚无缘无故黑屏了，关不了机，打电话吧又提示说关机的，两感应键吧又是亮的，这手机好让人心塞啊，到手的第一个屏幕显示有问题，让京东换了个，今晚突然又坏了，什么待机时间短，占运行内存啥的就不说了，谁叫人家屏大，自带软件太多且无法卸载呢，这手机我不想说了。。。。。	-1
手机用几分钟就会烫手表示很不好，还有这个手机没发票，提供赠品的手机意外保险也没送证明，以后坏了怎么办？？？	-1
手机用到一个月就开始出现突然无信号而且不发现一直无服务状态 必须重启才恢复正常 这样的情况多则一天两次 三星售后不待见网购手机 不愿意维修 去了4次就给做系统 没有丝毫的好转 又说硬件问题 京东客服说返厂维修 我才买一个月就发现问题 一直拖延解决问题 现在反过来要我 返厂拆机 我才买一个月的手机就彼此开 是我的问题吗 什么服务 什么品质 难道每个买这个手机的的都得成为实验品？ 远离京东 远离三星	-1
手机用快速充电充电时发热很厉害，运行其他程序再启动照相机的时候能听到明显的相机器件运转的声音，对手机的质量表示担忧。待机时间也很短，看电影的话两部电影就没电了。	-1
手机用的不到一个月就出现花屏，开不了机，打电话给客服还不给换，花了这么多钱买了个次品，打客服电话也是敷衍了事，根本没有服务可言，最差的一次购物体验，再买的就是傻子啊！	-1
手机用着不错，就是从5688掉到4988让我心里有点不痛快。	-1
手机用着没有问题，但是不知道怎么回事下面按键掉漆了，还是按键的侧面，真的很烦，刚买的手机就这样，就用了一个星期	-1
手机用第二天就不断重起，难道京东卖翻新机么？	-1
手机用第二天就没有信号，打不出去，还没有4G网。	-1
手机百分之百翻新机，什么玩意。	-1
手机的确挺喜欢，但是，前几天杭州大雨，人被淋湿，落汤鸡一只。手机随后在第二天摄像头前后起雾。这种密封性，还什么ip86防水？？手机在6-16购买，过了半个月，只能维修。去售后，他说拿吹风机吹，让我第二天拿。我也醉了，吹风机吹。。。。。。只能说这次购物我不满意。请京东不要屏蔽我的评价，第一次差评。真的！	-1
手机的缝隙不是一般的大啊！ 大到可以插入一张卡片了哎	-1
手机的质量不可以否定，很好，很喜欢手机，但是我使用京东四五年了，这次购物是我心里落差最大的一次，购买时*，手机拿到两天价格就降到*，申请保价，但是赠品居然还要扣钱，明显的捆绑销售，真的非常生气，四五年积攒的好感，真的快没了，无线充电那个东西问题很多，因为捆绑销售根本无法退货，捆绑销售那些东西你不买都不行，心里真的感觉被坑了，下次购买如果同等价位，不会考虑京东。	-1
手机盒子明明写着送无限充电坐、收到之后结果没有、	-1
手机看上去不错 性价比差的一逼 弧形边没法贴膜 还是个塑料屏 大家想下没有摸这个手机能用几天 联系三星客服三星往京东身上推 我要退货 大家别上当设计有大缺陷	-1
手机看着还行就是手机充电接口用自带充电线特别松，特别容易掉，我朋友的手机没有这问题，还有充电线没有标签和三星标识，不知是不是开过封！	-1
手机真心不错，京东欺人太甚，作为一名没收到&ldquo;一万元&rdquo;体验金的&ldquo;万元户&rdquo;。这是一次非常非常难过的一次购物体验，专员扯淡厉害，手机缝隙大，接完电话还顺带拔头发，屏幕玻璃有气泡，二次包装，建议大家翻开封条，看看下面是不是有个已经打开的旧封条。	-1
手机真的不行，还说防摔，很低的掉下就坏，还老黑屏，待机不到一天，还是新机。买时慎重。心里话。	-1
手机确实很好，我认为人家给差评的肯定是恶意的，我不会碰到，这次我也准备退货了，屏幕有坏点	-1
手机确实有发热的现象，对软件的支持匹配不如苹果做的好，手机的厚度和重量比苹果的大，外观不错，整体评价一般	-1
手机简直就是狗屎，刚刚拿到手，啥也没动，在设置栏里翻翻看看，就卡了，你这样的手机我还能要么，用了不到百分之15电我就把它退了，发烫还是蛮严重的，三星galaxy这几代更新下来还是垃圾，那时候的三代还不错，现在是越做越不行了	-1
手机经常发烫，经常误触，耳机听歌的时候不能吹风，一有风吹过来耳机里面就滋滋响	-1
手机经常死机 卡机	-1
手机美如画，但是我想打负分，京东首发就是一坨屎，17号23点01分下的单，昨天下午收到，醉了	-1
手机老发热什么情况	-1
手机背光片不均匀 搞得我整个右边屏幕都是白屏一到晚上	-1
手机能用，就续航差，还有送的耳机不能用，怎么办？	-1
手机膜难找合适的，送的膜根本就没有用。屏幕容易受损，使用一周出现破裂，维修需人民币*，烧钱！曲面屏是摆设，根本无什么作用，请大家不要考虑这款购买！手机能用就好！千万别追新潮，否则，后悔莫及！	-1
手机虽然漂亮，可是屏幕经常出现乱跳，不受控制，人生的第一台三星手机，失望之极！	-1
手机表面的那一层钢化玻璃没有贴好，手机屏幕上有一个小黑点，看着好难受，有点强迫症，其他的不说了，但是速度还是很快的。	-1
手机质量买回来就有问题，客服半天不理人，不能解决问题，差评！！！！太生气了	-1
手机质量太差，太差，这么贵的手机竟然无法上网，无法打电话，真失望，失望透顶，要求退货！！！	-1
手机质量太差，第一台用2分钟，机身就发烫，退货，客服劝我换一台新的。好，换一台，居然还是发烫！打华南片区客服半个小时，没人接，打总客服，等了几分钟总算有人接了，连句道歉的话都没有，就给办退货，退货倒是挺利索！从来我不发表任何评论，但这次真的生气了！！	-1
手机质量好不好先不说，为了能够点评，本来要退的货都忍住收货了。 首先是京东故意欺诈，明明缺货还故意在页面上显示现货当天送到。不仅无法按照页面显示将手机送达还找一堆借口，说网上支付导致收款时间太晚，被揭穿后还能找到层出不穷的借口来，真是佩服京东客服的本事。总之一句话，京东的手机要外出采购至少晚一天送到。准备在京东购买这款手机的客户要注意了。 本来是当天送人的生日礼物，被京东这么故意欺骗后当天送礼的计划也泡汤了。想着急拿到手机的准客户建议趁早选择别的渠道下单吧，免得生一肚子气。	-1
手机质量有问题，左上角轻按会出现整条绿色的线从上到下。要求换货既然说要等7-15天检测一下 我手机号码都剪卡了，旧手机用不了 叫我这半个月生意不用做了	-1
手机质量有问题，插入耳机后页面不停刷新，无法用耳机打电话，但可以接电话。去了一趟三星中关村的售后中心，售后人员的态度极差。本来买到一个有问题的手机心情就不好，再加上遇到态度恶劣的服务人员，对三星顿时失望透顶，也许三星手机是还不错（和苹果手机比起来品控差得太多），但下次的选择一定不是三星。花多少钱买手机不重要，重要的是不要花钱买气受。	-1
手机质量没话说，系统不得不说真心没有苹果好用。用了一段时间才来评价，其他都还好，相册反应太慢，打开至少半分钟，不然就是没反应，还要关闭重来，到售后，居然跟我说，没办法只能刷机，在意细节的朋友要慎拍阿	-1
手机质量还行，可是发票等了一个月了迟迟不来，真想给个大差评！	-1
手机跟纸糊的似的 用了不到一个月就坏了 还说维修需要4000多 买个手机才多少钱 让我自己掏钱 希望大家看到我评论以后都不要买S星S7 都特么的假货 谁买谁上当 三星越来越差了	-1
手机运行的时候发热的太快，而且还很烫手。难道高通820处理器真的发热快、散热慢吗？这应该不太可能吧！	-1
手机运行缓慢 机身发烫严重 太不值这个价位了	-1
手机还不错，京东的预定服务太坑人。提前缴费预定的反而发货晚，没赠品！客户很生气后果很严重	-1
手机还不错，就是客服太烂了，有什么问题客服总是不在	-1
手机还不错，就是没有发票	-1
手机还不错，服务，呵呵呵呵，	-1
手机还可以，劝大家不要玩京东白条，说着没利息，却收手续费，收手续费也可以，为什么不在首页说明白条无利息但要收取几百元的手续费，这算不算霸王条款，是不是欺骗消费者的套路，这一颗星不是给商品，而是给京东	-1
手机还可以，就是定金太坑了	-1
手机还可以，配送员没把货送到，给我放在商店让我自己去取，还另外给钱	-1
手机还好 就是没有无线电充	-1
手机还好，京东服务态度太差了，当时下单的时候分明写的第二天就能到，结果买了后显示无货，当时就是因为及时方便送到门口才在京东买的，18号凌晨下单22号才收到，这难道不算欺骗消费者？联系两次客服转到专员第一次我信号不好断了再也不打过来，我又联系一次结果有事没接上说72小时内再打来，结果再也没打来过。太失望，这么大企业做不到按时送货就别写个211送达来骗大家，客服不能为客户服务好就别设立客服了，浪费大家时间，失望，再也不买京东东西了	-1
手机还是可以的，三星的还是值得信赖，关键就是京东套路太深。。。。刚作完活动就降价，还特么什么618大促。。。。套路太深	-1
手机还是可以的，但我对京东真的不是很满意！刚刚5688买的手机，第二天一看，瞬间变成4888了！京东降价真的快，真的是666。图片是和客服的聊天记录，大家自己看	-1
手机还没拆封,快递太神速了,昨晚九点下单,今上午九点就到,必须赞!	-1
手机还没有别人1000块钱的反应快 手机卡的要死 屏幕背光调自动根本不管用 大白天 看不到屏幕上面的字	-1
手机还行 就是充电器看冲不进去电 还有耳机用了一次就坏了一个 感觉不好	-1
手机还行 铂金颜色稍暗 其它人都有无线充 心情不好 花钱一样 待遇不一样 只能一星了	-1
手机还行 对京东和三星客服一个大写的差评买之前承诺送的东西邮过来没有 还互相推皮球 京东让找三星三星让找京东的 聊天记录截图都不敢给钱了不敢承认了 只要一付钱就他们就是爹了 再也不在你们这里买了 差评差评差评差评！！！！！！！！	-1
手机还行，以后再也不在京东买东西了，去它妈的金牌会员，刚买十天就掉*，在店里买最起码还能有个补贴。	-1
手机还行，就是少个赠品，少个充电宝，明明带的，就是不给，哎！	-1
手机还行，就是屏幕不知道什么原因，是厂商，还是运营商的事，已经换过一次新机的，这次的屏幕虽然没有第一个机器屏幕严重，但是也有划痕，有点失望	-1
手机还行，就是耗电太大了，刚买一个月就降了100。千万别买移动联通版，后背的移动4g太丑了。	-1
手机送过来之后其他一切都好，用了一个多月之后发现手机自拍照片成相后显示照片为黑色底片状。申请维修里算外算大概小一个月，这次购物体验太差了。京东也不是没有假货。	-1
手机通话经常对面听不见我说话，什么鬼	-1
手机问题多，发热太严重。屏幕漏光。建议大家都别来买了，不值。	-1
手机除了外观好看些 像素高一些 最大的缺点就是发热厉害 充电发热 玩游戏发热 这手机真不咋好	-1
手机非常不错，可惜在618用*买了之后瞬间掉价400元。	-1
手机非常好，只是用了一个月后丢了，心塞塞	-1
手机频里有条竖线，每次看视频都好别扭。京东尽给发残次品，再也不会在京东上买东西了。	-1
手机颜值没得说 很漂亮 问题是为什么数据线不是三星原装的还有晃动机身有异响 很无奈 强烈要求退货	-1
手机颜值高，但收货当天使用就发现卡在某一操作页面无法动弹，也无法重启，已申请换货	-1
手机颜色与图色差异，实际颜色较深，我个人不大喜欢 。使用一天半 副卡型号极差，因为我自己用的电信?移动，移动做副卡会有电话进来无法服务 。最后无关紧要的白条分期好像是个幌子，退货需要检测 ，反正我怕麻烦今天已经低价卖给别人了。原本想晒信号图 可以手机给别人还原较快忘记了。且买且慎重	-1
手机颜色还好，可是手写输入总岀错，应用程序反应慢又卡，手机自发热，三星手机以前买过S4，很不满意，没想到S6还不如S4。还是苹果手机综合实力好，后悔。本人不是托，苹果5、6都用过，三星太差，除了相机外，和苹果手机无法比。不说了，棒子的手机以后一边去。	-1
手機還不錯，可惜前攝像頭有白點，這樣的不良手機都還要流入市場，想想三星手機的品質也只能這樣了	-1
才1天跑了200M流量而且耗电量巨大.我只是把自己试用的真实经历说了一下.	-1
才一天就被坑了300，不支持价格保护	-1
才不到2个月 屏幕先是花了 现在直接黑屏了 板砖一块 幸好买了一年的保修。而且手机本身很沉 发热量很大 各位买家多留心	-1
才买10天就换了关机键，怎么评价啊。。。。	-1
才买2天降*.你真行，就多了自拍杆和y就多了自拍杆和u 盘。真心太坑了	-1
才买一个多月，屏幕边缘就出现了两个黑色的坏点，只能拿去三星维修站更换屏幕，等了两个多星期才修好。三星的质量实在太差了，还买这么贵。	-1
才买一个多月手机就有杂音。。看来网购还是不靠谱啊	-1
才买一个星期不到就跌了九百块 还没有任何说法给我 无语	-1
才买一个月 就开始卡，卡到死机	-1
才买一周，降价800，不能价格保护。呵呵	-1
才买三天降价800！	-1
才买就降800？我靠	-1
才买来14天就坏了，用都没有用，就冲不进电，还开不开机。 完全变砖，差评，不用说。	-1
才买没几天，当时告诉是618价格，618不会再变，才买了几天而已，还没用，就掉了一百块，京东总是这样，买了东西就让你后悔，几天就损失一百块，客服能给一个合理的解释吗？谁的钱都不是大风刮来的，才几天就一百块，玩呢？京东最差劲就差劲在这，买的时候不说明白，过后不管你！	-1
才使用的十多天就发生了非常严重的问题，手机发烫剧烈，没有任何声音，卡顿，无法正常的操作，并且恢复出厂设置也是一样，非常不愉快的一次体验,希望能够做好妥善的售后服务，坚决不同意才买了十多天的手机维修！！！	-1
才几天就免息送充电器？	-1
才到手一天就降价600 你可以的京东	-1
才多久就降了1000元，现在用起也开始卡了，还是该买街机	-1
才用10天充电器就坏了 垃圾	-1
才用一个月 关机键已经不灵活了 按进去出不来！	-1
才用不到一个月，手机屏幕就出现花屏现象，有时出现红色线条，有时出现绿色线条，重启没用，恢复出厂设置也没用。现在已经返修，想到刚买就要大修，心里真难受，现在搞得也没有电话用了，非常不方便，真是非常差得一次购物体验	-1
才用了20天，就30厘米高度掉下去就摔碎了，后悔死了，差评，联系大家不要再买了。	-1
才用了20天，电源键就不灵了，去售后说是进土了，不知道怎么闹了下，又将就的能用了，电池也不行，其他还不错	-1
才用了几天手机就绿屏了，找了京东售后，说是屏幕坏了，要出一千多的维修费，日了?了。没摔过，后来又叫我找三星售后，明显是推卸责任嘛。	-1
才用了四天，手机也完全没有磕碰过，屏幕左下角就裂开来了，也不能退或者换，甚至要付费维修。这么脆的手机也真是醉了	-1
才用几天，按键就掉漆了	-1
才用几天，有时候会卡住	-1
才第3天 就死机 还想我说什么？	-1
打开相机时滋滋的有异响，还没有客服，差评	-1
打电话对方老是听不清，刚开始以为信号问题，后来才知道手机有问题	-1
扣了4个星。 我个人比较在意的： 1,32内存，本身机器内存就近6g，装点软件，基本50%，把歌曲和导航地图装进去就剩了5g，伤不起，国内没有64的？还是打算再出一批64的？安卓本身就爱存垃圾，这5g让我连游戏都不敢装了。无扩展内存有点伤。 2，电池不给力，虽说这个版本宣传的系统省电等等，但电池和我用了近一年多的s5差不多啊，说难听的都没苹果5电池耐用！ 3，发热明显，新机器和老机器比，都不如老的苹果5发热少，传输点东西，还没打游戏就开始发热，伤，还是shang. 4，整体看，机器确实做的不错，有苹果的fan，但新鲜过后发现也不过如此，卖价高，而且没有那么多让人惊喜的地方。电池和内存是硬伤。可惜了了。 如果不考虑双卡，还是考虑s6e吧，不光惊艳，而且确实比这个值。 有些失望，三星啊三星。期待摩托。	-1
抱着试试安卓的心态，用起来很卡，送人了，还是用苹果吧。	-1
拆开包装，屏幕就是坏的，无语了，看图吧！	-1
拉圾东西，冲电1小时才10％的电，联系客服都是推来推去的，不知道找谁才能解决问题，一点都不主动，最后让我自己去检查。我都醉了！三星那么大公司，京东那么大的平台，互相推卸责任，实在无力！	-1
拍照没有想象的好，客服长期没在线，还没有发票（连电子发票也没有）。	-1
拍照的屏上有条线纹，还有手机发热厉害，，，其他方面还是挺好的！！！	-1
拍的时候有无线充电器和手环，结果什么也没有！赤裸裸的诈骗，我强烈要求所有被骗的顾客联名起诉京东！	-1
招客服，好评师 打字员 工资，日结 qq5989133	-1
拨打电话对方经常听不到	-1
拿到不到2小时 屏幕有黑圈，换货要15天	-1
拿到屏幕有问题，后来大费周章的搞了一圈才换到货。。	-1
拿到手一个月就出现解不了屏，无法正常重启，很后悔买这款机子	-1
拿到手几天就出现这样的问题！以后教我怎么相信京东	-1
拿到手只用了2天就无法开机，联系京东的客服， 处理的时间不是一般的慢，以后，在京东上买东西 真的需要好好考虑考虑。	-1
拿到手是个二手货，开箱后出现这种问题。大家自己看。现在退货处理中。大概5天。	-1
拿到触摸不了，偶尔能动一下，按键有一个没作用。拿到假货了！！（三星维修店说的）谁告诉我怎么申请法院受理？？	-1
指纹按健的漆就掉了，质量有问题|	-1
指纹解锁识别太差，	-1
按理来说 应该有个无线充电器 为啥没有？	-1
按键很烂	-1
按键真是不灵光，真不顺手？	-1
挺失望的，手机的ime sn编码竟然跟包装不一致，国行能出现这问题挺值得怀疑。正在办理退货申请提交快一周了，售后审核遥遥无期......	-1
换了三台屏幕才没问题	-1
换了两台都是硬件故障，直接退款！一台不能充电，一台LED皮套无法使用，也就是NFC功能故障。	-1
换了两次手机都有问题，没办法买了	-1
换了几张膜 都贴不好 卖家既然说本来就这样 这售后 失败的购物	-1
换回来的货我只能说呵呵了手机上方传感器有明显的擦痕后面摄像头还是歪的真怀疑这是用过的！	-1
掉床上就摔成这样了。 屏幕真心烂	-1
掉电太快，样子是挺不错，安卓系统不如苹果的ios好用	-1
掉电是真的快，掉价比想像中的还要快，都没法接受。	-1
描述不清晰	-1
描述严重不符，还说什么顺丰专线。我同天发的韵达比这还近早到了，打电话顺丰问了才知道这家发的是特惠线，比韵达还慢，竟然6天才到。客服说话还特横！	-1
提前好多天前预定的 到了今天才到货 北京当天就有货就是不给发 想退？可以 订金不退！ 提前预定也没有任何好处 只能怪自己太贱！	-1
搞不懂为什么什么都不送，就连贴膜都没有 十个差评都不解气 垃圾玩意	-1
搞了半天，发票还是没收到，扯皮说已经给过了	-1
搞得预定活动太垃圾	-1
搞预售，要先交定金，那你倒是提前发货啊！不用预定的和预定的都是同时发货，预定有什么意义，完全坑人。而且后面买的送储存卡，送拍照支架，还有充电宝&hellip;&hellip;	-1
摄像头不正 卡槽下陷 严重差评	-1
摄像头进尘，！！！！！	-1
摄影选择专业模式 ios调成400以上 屏幕出现严重闪烁 照片出现很多棕色横纹 慢动作摄影也是这样 怎么解决？	-1
摔一次屏幕坏了,我用的苹果5都忘记摔了几次没有一个地方是完整的,屏幕也裂了,一点事都没	-1
摔了一下划了三道。太脆弱了	-1
操 开始没无线充电器 买完就有无线充电器 逗我呢	-1
支付完就显示只有1个移动电源的赠品！ 没有诚意就别搞这些虚的！ 搁谁能高兴？ 搁谁不退货？	-1
收到后开不了机，直接申请退货了，售后等了24天总算解决了，急死我了。	-1
收到当天，正导入通讯资料，触屏就突然失灵，重启4次后依然失灵&hellip;&hellip;&hellip;&hellip;这都什么情况，就算是优惠期间也不能发残次品给客户吧，，太不靠谱了！	-1
收到手机没有采取保护措施，直接就是一个破箱子装着的而且没有发票，手机还是可以的，送的东西不错，	-1
收到的是个次品，屏幕下方有黑点，换回来的机器一开苞里面很脏，三星的手机现在是在垃圾场里面封包的吗？	-1
收到货，连接wifi.玩了一下。发热严重	-1
收到货包装盒一点都不严实，细心，后悔在京东买了	-1
收到货时边框有划痕！	-1
收到货第一感觉就有点小失望，可能是看惯了6s，没用过三星，买这个手机时报的期望太高的缘故吧。外观好不好无所谓试试性能咋样，但用了一天手机热的能烫死人，不论是充电还是打电话看视频，都热的有四十度左右。申请换货客服说要到7-15个工作日，泥马7-15天不说，还是工作日。我也只能呵呵了&hellip;&hellip;哎在京东买东西也就是碰运气，运气好了皆大欢喜，运气坏了送个次品你也只能默默的用，没办法设让它们店大呢	-1
散热不好，看个视频30分钟左右，手机发烫；变相降价，10天前购机要自个购无线充电器，现可送无线充电器，多花进300大洋，棒子的东西降价太快，后悔没购iphon的	-1
散热垃圾，老子手都烫得不行	-1
整体感觉还可以 不过不知道是系统原因还是什么 第一天 微信变黑幕三次 而且重新开机后 微信还是那么回事 过一会就自然好了 不懂不懂	-1
整体还可以，但是有个问题，既然是双卡，为什么双卡是指开启时灰色的，点不了，导致一号在通话，另外一号短信呼，晕死，能试的法子都是了，明天还不可以坚决退货！说有礼物赠送也没有，就是裸机！	-1
新买的Galaxy 盖乐世 S6 edge 全网通刚用一个月屏幕上经常出现红色的竖线。。 看图片，那条线。。。	-1
新买的手机屏幕左上角一大块黑斑坏点心情十分不爽，打客服要求换货告我7到15天检测完才给换？我4G卡都换了我怎么用手机？？？	-1
新品上市销量这么差，三星公司又要伤心了吧～反正我是只用三星不用苹果的人～上了移动和电信的卡，双卡设置铃声和消息铃声有点麻烦，卡2设置不了呢	-1
新手机，此处有非常明显的划痕，求解释	-1
新手机屏幕鼓了个包 换机子还得十来天 什么事呀	-1
新手机没用一个月，就随意一放，手机屏幕碎了，已经忍了三星手机发热，软件不好用了的缺点，但是连硬件都这么不堪一击，三星，呵呵呵，差评，要买的想清楚。	-1
新机使用没多久出现粉色屏闪。无法正常使用。正在观察情况，不行就退货。	-1
新机器直接是坏的，退换货还要N多天，失望！	-1
新机第一次使用就遇到&ldquo;照相机故障&rdquo;，通过&ldquo;应用程序&rdquo;、&ldquo;重置&rdquo;均无法排除故障！本来网上购买就想图个便捷，现在不知怎么办！	-1
旗舰机的价格，千元机的品控，说真的品控还比不过千元机，第一台各种毛病，换回来第二台还是各种毛病，就算你是首发，品控稍差，但是你也不能比不上千元机吧，你这是旗舰啊，一台买人家5台，你就这么糊弄消费者。	-1
无力吐槽，旗舰产品质量都是这个样子，实在不敢恭维，考虑入手的朋友三思吧。。。一开机心情瞬间跌入冰谷	-1
无发票，要求补纸质票，居然收费，和他们理论，他们居然还说火星文。让人看不懂。我对这次京东的购物非常不满意请求解决如三天之内不给我补发票我就申请退货再也不会在京东买东西了	-1
无爱了，千万别摔倒背面~ 从桌子上摔下来	-1
无线充电器呢，被私吞啦	-1
无线冲呢	-1
无语	-1
无语，降价太猛，不到一周降了800元，返点京券吧。。。。	-1
无语了，新机到手3天，黑屏/卡机，手动重启好多次。。更新了6.0系统，目前未出现问题，希望能一直保持下去	-1
无语了，这几天趁着京东白条12月免息，才赶紧买的！没想到到头来还是跟我收*钱手续费！呵呵哒！第一次用白条就这么坑。联系客服也不回。就冲这个态度，呵呵！！！	-1
早上9点多拍下，系统显示下午派送，联系客服也说当天派送，网上客服还一直说是我放在寄存柜没去拿，五六千的东西你去寄存？本想投诉她的，晚上8点多再联系客服才说要延迟到明天才派送，妹的！还承诺什么211限时达，太让我失望了，坐标深圳	-1
早早预约，16号等到17号0时，抢呀。。。终于买到了，可是京东的仓库一天都不发货。京东你搞啥首发，要隔天才出仓干脆就别搞首发。还是货运罢工了？也不给客户一个解析赔偿。这次对京东服务大打折扣。	-1
早晚倒闭，不能在京东买东西	-1
明明买的是钛泽银，寄来的确不是，不知道是故意的还是太粗心大意，造成我非常生气，影响了以后再次购买的信心。	-1
星期六到货，今天玩王者荣耀，手机突然死机重启了，要不要退货啊？为什么我会遇到这种问题呢？	-1
昨天*买的，今天就*了。这降价也太快了吧。感觉被骗了。	-1
昨天买今天就降价，先提价给卷，再降回原价，佩服啊呵呵，屏幕还有一个小刀口，虽然不影响使用，但是以后不会在京东自营里给好评了，垃圾！	-1
昨天买的，今天赠品就多了两个，还不给补发，真是呵呵了~京东牛啊~售后全是官方回答，我退了再买可以吗	-1
昨天到的 用优惠券5288 今天来评价一看价格4988 你说是给好评还是差评吧	-1
昨天就送无线冲，今天送这么多东西	-1
昨天才收到，用着用着就黑屏了，一天时间黑了几次，第一次用三星，以后可能不会再买三星了，也不会在京东买了。	-1
昨天收到的机结果是次品开机屏幕左上方就有2个黑的	-1
昨天收到的货.可是插入SIM卡不识别 换了N张 电信 联通 移动的都试过就是不行.也去维修站了 也不行.今天给客服打电话要求换货..客服也给申请了.就看进度如何了. 希望不要太慢..暂不评分.	-1
昨天收到货，今天掉在地上屏幕就坏了。质量太不一般了，我要客服查换个屏幕多少钱，售后点什么的，给个链接我又看不到	-1
是不是正品我是真心不知道了。刚买回来没两天就老是死机，后来频率越来越高。然后联系客服，客服说没超过15天可以换货。然后送去检测了，确实有问题。就换了。结果寄回来的我想说肯定不是新机。手机肯定是别人返厂修了的。手机上面还有黑颜色类似油的东西，然后手机上的原装膜里全是灰尘。而且手机明显右边的缝隙比左边大。然后使用了一段时间，没有出现死机，但是电池确实没有第一次发过来的手机经用。就手机本身而言，如果不是有问题的手机用着还是可以的。只是老收到有问题的手机，谁也不会开心吧。我想以后应该不会再在这里买手机了。	-1
是实话京东最差劲的一次购物 说好现货购买 全款完 又说缺货7天才发货 无语！	-1
是真机，绝对不假。但是拍的时候上面显示送一个32G的U盘和手机套，但是却只送了个充电宝，感觉*给骗了	-1
显示送5个赠品的，没送差评	-1
晚上开机成图一那个样子，不愉快的购物	-1
曲屏，很不好用，拿着手机就相当于点击了屏幕的两边。 背面也是玻璃！从茶几上掉下来，背面碎了！！！ 网络不好！ 打电话用杂音！经常打到一半断掉！ 输入法很不人性化！	-1
曲面屏幕只要使用横屏模式，曲面那里就会闪烁，非常影响使用！！！！	-1
曲面特殊号码功能完全没用，添加上去过一下就消失，看网页视频卡屏，经常系统卡屏，屏幕粘合处漏胶，	-1
更新app特别的容易发烫！还有就是误触	-1
會有嚴重閃屏問題,等待回覆消息與處理方法 真的要評估清楚 造型是不錯啦！但是閃屏真的對眼睛很不好 使用起來也很難傳訊息ㄧ殖跳閃 請大家多多考慮	-1
有了一个月左右，就黑屏了，打不开了	-1
有划痕	-1
有品质管控麽？这什么玩意儿	-1
有时拿出使用，屏幕下方突然自己不断触动屏幕，手机屏幕，实键失效。只有重新启动。现在申请换货。	-1
有毛病 下次还是去实体店买比较放心 退换太麻烦	-1
有点像盗版的	-1
有点失望?手机没想象中好	-1
有瑕疵，建议到实体店看好了再买，退换货非常麻烦	-1
有的时候有点卡顿 别的都挺喜欢 什么礼品都不给送太抠了京东	-1
有的软件上不去。不知道真假。	-1
有种被欺骗的感觉。外观没得说，甩开其他机子几十条街，但内功真不怎么样，三星的系统真渣，升级5.1后，放在口袋里来个信息、电话，居然没有防误触，自己就操作了，好几次都自动把电话给挂了。再有后置摄像头是歪的，各个批次角度不一样，但都是歪的。。。。三星真的不注重细节！	-1
有顿卡现象打开软件的速度比较慢连已经用了3年的苹果手机的速度都比不上	-1
服务太差了	-1
服务太差了！东西还可以！	-1
服务态度不好。手机发热严重，电池不耐用，价格贵且容易迭价，没有保护膜贴。手机颜色不耐看。目前就这些，等用些时间再来评价。。。	-1
服务态度很不好，收到快递几个小时，开始没有细看，后来就细细的看了一下手机，看到我自己都气死了，手机上面两侧都开了，联系客服，说他们是三星客服不负责，说让我找京东客服，我联系了半天也没人给我回，还是算了，麻烦，不退了，客服态度恶劣，给个差评，告诫后面的人，谨慎购买吧	-1
期待不能太高，我不知道是不是所有s7都这样，至少我在京东买的这个s7非常差劲，触屏不灵敏，运行卡顿严重，甚至还不如s6流畅，京东的应该是真机，但是s7只能给差评	-1
未按时发货，投诉以后才发，这次的限量版诚意不足，不合算！	-1
本人网购多年，这是唯一一次差评，买来第一天，sim卡都没来得及安装，出现蓝屏，我从未对手机做过任何改动，然后提示非官方系统，返回京东，并没有做任何实质性的处理，给我原物返回，让我自行解决，拿去三星售后说明情况，售后表示可能是个二手货，是被别人退回的机器。然后我还花了65大洋修理。我本想再到京东退换货，后来一想算了，我退回去了以后这个手机就可能被京东再当成新机再次销售，那就说不上是几手货了，为了杜绝这种恶性循环，再说也已经修回来了，能正常使用，那就让它在我这里画上句号吧，我是京东的忠实粉，这次真的太让人寒心了。还有售后总是以一种非常傲慢，带走嘲讽的语气跟我对话，让我真心受不了。现在觉得我自己很冤，买了个垃圾货，还得自己掏腰包处理，真没想到京东也会出现二手货这种东西，真让人失望。不过要提一下，京东快递真心给力，快递员很细心，很负责任，而且态度极好。京东售后的态度要是能有快递员的一半好，那会更…	-1
本来以为贵就好点，但并非如此，首先说说屏幕，亮度调高点，认真一看，妈呀，屏幕不断跳动，尤其是白色屏幕的时候，看得更清楚。就像十几年前那种电脑大显示器一样，看着就眼花，更是心痛那么贵的手机如此质量。曲屏还不好贴膜。还是双曲屏呢，手机不好拿，手感差，手一抖就可能没了，尤其这曲屏是把屏幕突出来的，别说爆屏那么严重了，就平时也很容易刮花的。还有手感不好，在曲面上的东西就不好点了。算了，都买了就给差评吧。	-1
本来半星也不想给，无奈，只能选一星。618买的，5688，送四百的券，折后5288，觉得还行，今天同学告诉我这款手机在京东降价了，一看还真是4888，并且不能申请价格保护，说是有赠品，我就想知道为什么不让消费者选择？从此对京东无爱了。只能祝愿奶茶东永远4888吧。	-1
本来想买点儿零食，一看到从5688降到4888瞬间就什么都不想买了，那些赠品只有保护壳和SD卡在用，这俩加起来不超过100块，无线充电真是可有可无，其他的根本没用，做活动本来就应该比平时便宜，活动过后反而比活动价还便宜，做活动意义何在，以后你双十一等活动的时候还敢不敢跟你这儿买？真不敢了！商品本身是不错，但你这营销手段真是。。。。。。	-1
本来想把过程什么的都写着来，但是懒的写这一星是给快递小哥的，最重要一点同事比我后一天买的是六月份手机。我的第一部是四月份，第二部五月份，什么鬼这真的不是别人退回的货吗	-1
本来想给满星好评的 ，但是！送的赠品太垃圾 售后都不理人，全是坏的 次品！！！！现在开始怀疑手机是不是次品了！	-1
本来挺好的 今天收到货3天用着没有问题 结果今天第4天下午有电话打进来就听不到对方说话 对方也听不到我说话 手机重启两次才解决 所以我觉的一下子心情很差 第二点就是打电话和挂断电话的感应上较慢 体验质感全无。	-1
本来是因为抢不到iphonese才来买的S7edge，并且喜欢S7edge的快速无线充电器，下了单才发现有评论说是送的不是S7edge的无线充电器，后来就与客服咨询了，结果京东客服与店铺客服互相推诿，都表示不清楚赠品中充电器是哪一款，最后无奈了，请客服查询，若不是S7的无线充电器就不打算要了，客服表示查询后发短信告知，现在货也收了，短信还没见到，充电器我自己都收到了，确实不是S7edge 的，最不开心的购物了，以后拒绝三星了。	-1
本来没什么评价的习惯的 手机没有问题使用体验非常棒对京东的服也一直没有什么诟病 直到今天下午接到客服电话来给我推销什么手机意外险 你京东学谁不好学那些贱逼卖保险的 爸爸买不买意外险爸爸自己会考虑要你推销? 还由于我是钻石用户特别给我推荐 钻石用户反而要更多的忍受你们的这些垃圾信息? 以后没事不要给爸爸来电话！	-1
本来计划买了在曼谷有水的环境下使用该手机，但是手机在水里，水流的冲击就会形成触控操作，根本没法正常使用。（比如拍照按钮失灵，一直自动返回等）不能区分水流还是手指。这样一来，我买这个手机的最主要的愿望（水下使用）基本就是幻想，哭晕在厕所。三星S7系列的手机广告都在宣传防水性，误导了消费者可以在水下使用。重点是10小时过去后，打开音乐播放，居然喇叭不出声，甩了几下甩出水后有了点声音！！这能算是不合格产品吗？强烈要求退货！	-1
本来说前200名送蓝牙耳机的、本来是前50以内拍的、硬是说我拍的时候在200之外、你不想送就不要说送啊，虚伪！如果不是给朋友买的直接退货！预祝三星滚出中国市场！	-1
本次体验只能用曲折来表达，虽然京东物流速度很赞，计划时间内送到手，但最终还是漏了一件赠品，再补发呗！拿到手机后一阵兴奋，然而并没有持续多久，所有的兴奋便一扫而空。到货的第八天也就是无理由退货期限过后一天，手机屏幕息屏后自己又亮了，屏幕显墨绿色，想退货但是客服说退不了，那就换吧！大概一周时间第二部新机到手，手机屏幕保护膜不再像第一部那样整齐，感觉手机是其他问题手机处理之后重新包装再发过来的！刚开始两周没任何异常，心里的大石头终于放下，但是第三周问题又来了，在白色背景下，发现屏幕有明显的闪动。这就是我购买这部手机的体验，给大家做个参考！	-1
本次物流是是京东最大的败笔，预示着京东的没落的前兆。	-1
机器入手3天，综合的测了下。这机器外形很不错，其他的就不提了。充电时候发热奇高，拿到手里刷微信时候温度奇高，揣在兜里听音乐的时候机器发热腿部明显能感觉到。电池待机堪称垃圾中的垃圾。这手机6000多元绝对不值，谁买谁上当！最重要的是手机信号一般，在信号弱的地方明显不如苹果6和三星的NOTE 3和三星的T705C （这三款机器是我同事的，都是移动卡，我用的也是移动卡）	-1
机器尚可，随机赠品中午看到的和晚上实际购买的有差别，中午明明有送蓝牙耳机，晚上购买的时候确没了，意外保修也是无货的，必须要自己自愿去掉才能下单。jd的手机差评是应该的	-1
机器很好，三星这几年还是不错的。但!但!但!配件上午下单时候是立式快充加32g卡，下午付款时就变成了什么投屏器和白色平方的快充。还有买一个月就能少花600毛爷爷!分期一个月也就还300多，也就是说。买了之后1一月就会亏600!去年买s6e也是，一个月600!三星有问题，京东也跟着有!差评不是给机器的，是给服务。要不是这个我才懒得评价呢	-1
机器有问题 已退回客服	-1
机器有问题，指纹频繁错误	-1
机器没话说，这曾品买的时候还是无线充电器 来了就成内存卡了。。。在购买选单里面就没有个随机赠品。我真是无语了，这是我已经315了 太坑爸爸了 买的时候一定看清楚	-1
机器没问题，拍照给力，续航稍差，没有其他人说的各种各样的小毛病，最不满意的是京东搞的预售，本来订的32g，15号当天全款下单，等了20多天也没到货，一周拖一周，后来退掉换的64g，下午下单第二天早上就到了，没货你京东搞毛线预售，在京东买到金牌从来都是五星，这次必须一星，就是给你预售的	-1
机器肯定是拆过的，封口那贴了两张纸，你们可以注意一下，京东什么时候给个解释	-1
机子不错，一星是因为预约配送时间。。。	-1
机子发应太慢，老是转圈圈正常浏览网页都很难。不知道是不是买了翻新机。好像跟以前用的功能机一样好卡。82O不是应该快些吗 ？下载东西也不能下，真的蛮拉圾的！	-1
机子发热太严重了	-1
机子发热太厉害，花屏、反应慢，还是比不了苹果	-1
机子外观不错，潮人必备。 但，我这里要强调个但。 系统真是各种Keng爹Keng娘Keng全家，刚开机就叫系统升级，升级了一个世纪都没有升完，最后就是死机，联系京东让我重启，重启了之后也是无限死机。哎，可能自己运气不好，也可能机子本身有问题，最后退掉了。	-1
机子很美很好用，卖家的服务很差劲，发货直接就发了一部质量问题机过来，摄像头会偏，没有注意到手机有裂缝开机了退回去居然说是我摔坏的给我退回来，退就算了，赠品加发票就扣留起来，不找他们的话还没打算发回来给我。手机包装得不安全。然后发票居然开着插边球的晶东发票过来，我是在京东买的东西为啥是晶东的发票？ 第一次在京东买手机也是最后一次，在也不相信京东了。	-1
机子收到不到一周就出现问题，申请换货却一直忽悠拖着，请问这就是京东的服务态度吗？消费者的还能相信你们吗？	-1
机子有刮痕，已经晒单	-1
机身3处划伤 再加上京东那种牛B的售后服务态度 我想说 顾客到底是上帝还是奴隶了？	-1
机身发烫太历害了，电池真心不够用。希望你们能否换一台给我。	-1
机身外形挺不错的，使用体验也不错。只是好奇为何包装挺好好的如何刷的机，三星110上并查不到生产日期和生产地址。4688的价格入手勉强接受。	-1
机身有使用过的痕迹，条形码标签有揭开过的污渍，已经申请换货	-1
来的就是坏的，屏幕有亮条，果断退货	-1
果断入土亢，费电，电池不挺用，比我口袋里的票票消的还快！	-1
果断差评！！气炸消费者！！买手机这样的价钱是冲着赠品去的，卖家私自调换赠品，发的赠品与图片不一样，调了两次货也没有调过来，皮套送的一般，钢化莫送的是曲面的，一个也用不上，并且在调货的时候客服服务也不及时，前一次在旺旺上还有人搭理你，后来直接都不理你，后来还是打电话才有人理，真是存在欺诈消费者，有图有真相，附聊天记录，赠品图片！！！！差评差评差评！！	-1
果然是店大欺人！说好的赠品结果一样都没有！打电话问客服，说我拍的时候没这个活动，要以下单时的页面显示为准！没赠品没活动你写上去干嘛，连个提醒说明都没有！忽悠人吗？早知这样还不如去别家买，人家还返500的卷！	-1
某* 某*那些用卷了4000多 亏了 买亏了 只能这样说	-1
根本没当面签收，直接扔自提柜里	-1
根本没有发票，那个意外险也没有，而且时间太长！太差了	-1
根本没有送货就签收了	-1
次品，发票也没，里面有白的点	-1
次品退了退了退了退了	-1
欺骗消费者 我17号收货 618活动满5000减400 妈的我下单只有5288的 送过来当时也就没看直接刷卡了 后来才发现根本就是以原价买的 煞笔玩意 一星都不想给 桃宝虽然假东西多 但价格不会骗人 真垃圾京东	-1
正在申请退货，我发誓如果是我弄的屏幕划痕出去马上被车撞死	-1
正面朝地，一下就坏了	-1
此生不再买三星，屏幕有坏点，换了一个屏幕发红，质量真的令人担忧	-1
死机，重启不了。系统乱码一样，谁买谁SB	-1
死机严重，莫名其妙的突然就死机了，拍照片一会就死机了，玩游戏业业也死机，	-1
死过一次机，鸣响，5分钟后好了	-1
每次买东西都不给发票 明明已经注明了纸质发票 逃税还是漏税	-1
比其他卖家送少了很多东西，价格都是一样的，真后悔啊！	-1
比别的地方贵了好几百块钱！三星的掉价太快了！！！如果不是很着急换手机，我建议不买！！！	-1
比较便宜 而且刚买来系统更新过一次，可能是翻新机	-1
比较糟糕的体验，手机用一会就烫的厉害，还特别容易卡机	-1
毕竟这么贵的东西 刚买回来不敢评价 呵呵 我就日了哈士奇了 手机不兼容游戏不说 手机自起是什么鬼？微博字都打不了 我是刚重启完就来评价的	-1
毫无疑问预售差评。手机还可以。三星量产品相粗糙。	-1
没买的不用买了，触屏太垃圾，尤其玩游戏或者使用app不是点了不管用，就是一点就跑屏，屏幕一下就跳到别处了。之所以没退就是看在基本功能不影响使用，款式比较好看，还有不错的相机	-1
没什么好说的，东西有问题就自己去弄，弄好再给你们京东，然后还要等几天看看是不是允许我换货，在京东，没付钱你是大爷，付了钱的客户京东是大爷	-1
没几天，数据线内部就断了	-1
没啥吸引我的东西，平平淡淡的，不值这个钱	-1
没啥说的，不如苹果	-1
没想到无线充电器是与手机分开卖的，更没想到的是刚过七日无理由退款日才发觉现在有送无线充了，感觉太冤了，先前也没留意有没有送就签收了，（10月4日买的，今天是10月14日）刚客服说了，京东根据市场，，，，，太失望了，以后也没啥信心再在京东买东西了	-1
没想到真的出问题了 说用一个月来评价 真的就出问题了 电池一个小时掉50%的电 不用放那也会掉很多电 那个送的耳机第一次拿出来用就是坏的 花了这么多钱 就买了这么一个东西	-1
没想到网购一款所谓的高端手机，就让我中了大奖，扬声器经常出现颤音，现在干脆就无声，幸好有听筒模式（听微信），振动模式（接电话），不然就是个废品，下载的手机银行客户端，（工行农行都一样）超过十天没用过就登录不上了，又要把它卸载后再下载，还还一天出现N次工行手机银行已停止的字样，烦得要死，现在就像大爷一样，太难伺候了，拿到手机第三天就出现问题了，我想等等看，一直到过了免费更换期还是一样，才打客服电话，叫我恢复出厂设置，还是一样。	-1
没收到32g存储卡	-1
没有为什么，就是不爽	-1
没有任何磕碰，买来不到五十天就这样了，说是过了包换包退期，只有修了。如此机器，强烈建议不要买	-1
没有最差的服务，只有更差的服务，态度好不能解决问题，要好态度有什么意义！要是有负分肯定给负分。	-1
没有双击点亮屏幕功能.本以为指纹解锁是放上去就能解的,但是必须点亮屏幕才可以用指纹解锁.物理按键使用率超高.而且手机玩游戏发热.快速充电也发热.电池不耐用.上班上午玩一会.下午玩一会都坚持不到一天.根本不值这个价.而且曲屏感觉就是个鸡肋.根本用不上.谁会有时间总去搓它来看时间看信息?只能用来装X.没有一丝亮点.很后悔购买. 最后说下快递.EMS超慢.态度超不好.网站写着7号下午1点半就货到了,我打电话说自取邮政说没到.8号打电话,说货以下发到邮递员,让给邮递员打电话,给邮递员打电话结果他说他喝多了,送不了.自取也不让.说第二天给送.结果第二天9号打电话整整一上午不接电话.给投递班打电话也没人接.中午邮递员打电话说让去取货.人去了,又告诉钥匙没带.他一会还要办别的事,说下午给送.下午打电话他又说他去外地看病,明天给送.这样,7号到的货.10号上午才拿到手.反正就是一次很失败的购物.	-1
没有发票 冲电很烫 可以煎鸡蛋了 电池超不耐用 电一会就没了 建议去实体店买 还有运行内存 系统直接占了1.6g 再加上软件的300多兆 运行内存只剩下1个g不到 呵呵 你们自己掂量掂量	-1
没有发票 鄙视	-1
没有发票？什么情况！差评！	-1
没有发票。。。。。。。。。。。。。。。。	-1
没有啥意思，	-1
没有想象的那么好 老死机	-1
没有红外线 和电信卡一起 4G 只能用电信 什么玩意	-1
没有给无线充电。差评差评差评	-1
没有耳机不开心~手机还没用 不知怎么样 就是sim卡要剪这么小的啊 一开始都用不来	-1
没有苹果手机好，三星里面下载的软件也不能	-1
没有货预定个屁 等了那么长时间 *就是*	-1
没有赠品不开心23333	-1
没用几分钟就发热..........	-1
没用几天 金属边框就划了	-1
没用几天hoom键就掉色，打开套报和京东经常卡在页面上，已经挂在58同城了，以后再也不会买三星了！！！	-1
没磕没摔，三星一定要说人为，拿手1个小时，就充了个点，无语了，不过快递点赞，客服也点赞，起码耐心OK	-1
没给发票	-1
没苹果的质量，却卖的和苹果差不的价，才用2月就有问题！	-1
没见过这么坑的，这手机买了就后悔，玩一会就会很热！	-1
没见过这么无耻的电商，还有煞笔的可爱的专员	-1
[truncated: 6,187 more rows]
